# Supplementary material for: Ruthenium(ii)-catalyzed regioselective 1,6-conjugate addition of umpolung aldehydes as carbanion equivalents
Source: Royal Society of Chemistry journal article supplement (doi:10.1039/d1sc03732c), 2021-11-29
Supplement: d1sc03732c1.pdf [file d1sc03732c1.pdf]

## Supporting Information

# Ruthenium(II)-Catalyzed Regioselective 1,6-Conjugate Addition of Umpolung Aldehydes as Carbanion Equivalents

Hyotaik Kang and Chao-Jun Li\*

Department of Chemistry, FRQNT Centre for Green Chemistry and Catalysis, McGill  
University, 801 Sherbrooke St. W., Montreal, Quebec, Canada H3A 0B8

correspondence E-mail: [cj.li@mcgill.ca](mailto:cj.li@mcgill.ca)

## Table of Contents

|                                                        |    |
|--------------------------------------------------------|----|
| 1. General Experimental Information .....              | 3  |
| 2. Experimental Procedures.....                        | 4  |
| 3. Optimization for the Reaction Conditions .....      | 6  |
| 4. Synthesis of Starting Materials.....                | 9  |
| 5. Chemoselective Competition Experiment .....         | 9  |
| 6. Deuterium- Labelling Studies .....                  | 10 |
| 7. <sup>13</sup> C- Labelling Study .....              | 15 |
| 8. Product and Starting Material Characterization..... | 17 |
| 9. <sup>1</sup> H and <sup>13</sup> C NMR Spectra..... | 34 |
| 10. HPLC Chromatograph .....                           | 93 |
| 11. References .....                                   | 94 |

## 1. General Experimental Information

Solvents: Tetrahydrofuran (THF) was taken from Pure Solvent MD-7 purification system from Innovative Technology in a dry round bottom flask with activated 5 Å molecular sieves beads activated in the oven at 380 °C for at least 12 h before use and purchased from Millipore Sigma. Solvents for filtration, transfers, and chromatography, were acetone (ACS grade), dichloromethane (CH<sub>2</sub>Cl<sub>2</sub>) (ACS grade), ethyl acetate (EtOAc) (ACS grade), hexane (Fisher, ACS grade), pentane (ACS grade), methanol (ACS grade), and chloroform (ACS grade).

Purification: All work-up and purification procedures were carried out with reagent-grade solvents. Analytical thin-layer chromatography (TLC) was performed using E. Merck silica gel 60 F<sub>254</sub> pre-coated plates (0.25 mm). Flash column chromatography was performed with E. Merck silica gel P60 (40–63 μm particle size, 230–400 mesh) (SiO<sub>2</sub>). Visualization was accomplished with UV light. Automated flash column chromatography was performed on Biotage Isolera™ Spektra Systems with ACI™.

Chemicals: In the model study, benzaldehyde (Millipore Sigma) was distilled before use. Other commercially available chemicals are purchased from Millipore Sigma, Alfa Aesar, Oakwood Chemicals, Thermo Fisher Scientific, and Santa Cruz Biotechnology and used without further purification.

NMR Spectroscopy: Nuclear magnetic resonance (<sup>1</sup>H, <sup>13</sup>C, and <sup>19</sup>F) spectra were recorded on a Bruker AV500 equipped with a 60-position Sample Xpress sample changer (<sup>1</sup>H, 500 MHz; <sup>13</sup>C, 125 MHz, <sup>19</sup>F 471 MHz). Chemical shifts are expressed in parts per million (ppm) units downfield from TMS, with the solvent residue peak as the chemical shift standard (CDCl<sub>3</sub>: δ 7.26 ppm in <sup>1</sup>H NMR, δ 77.0 ppm in <sup>13</sup>C NMR). Data are reported as following: chemical shift, multiplicity (s = singlet, d = doublet, dd = doublet of doublets, t = triplet, td = triplet of doublets, q = quartet, quint = quintet, sext = sextet, sept = septet, m = multiplet, br = broad singlet), coupling constants *J* (Hz), and integration.

Mass Spectrometry: EI-MS was obtained from the Agilent GC-MS system. High-Resolution Mass (HRMS) spectra were performed by the McGill Chemistry Department Mass Spectrometry Facility and were recorded using electrospray ionization (ESI+) and/or atmospheric pressure chemical ionization APCI(+/-), performed either on an "Exactive Plus Orbitrap" ThermoScientific high-resolution accurate mass (HR/AM) FT mass spectrometer, or a Bruker Daltonics Maxis Impact quadrupole-time of flight (QTOF) mass spectrometer. Protonated molecular ions (M+H)<sup>+</sup> or sodium adducts (M+Na)<sup>+</sup> were used for empirical formula confirmation.

## 2. Experimental Procedures

### 2.1 Preparation of hydrazone solution

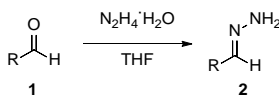

Hydrazone solution (1.25 M): Dry THF (1.0 mL) was added first into a small vial with a stir bar. Hydrazine monohydrate (2.3 mmol, 111.6  $\mu$ L, 64-65 wt%) was added into the vial at 0 °C. Then, the corresponding aldehyde **1** (1.5 mmol) was added dropwise into the stirred solution and the mixture was stirred for 30 minutes. The solution was warmed to room temperature and stirred for an additional 3 h with the addition of a proper amount of anhydrous  $Na_2SO_4$  for water removal.

### 2.2 General procedure for the regioselective 1,6-conjugate addition reaction

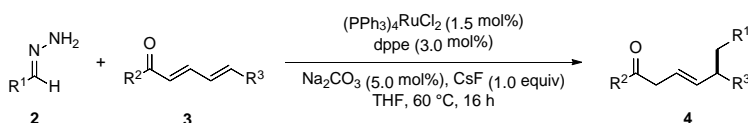

In a flame-dried or oven-dried V-shaped microwave reaction vial (2.0 mL) equipped with a Teflon-coated magnetic stirring bar, electron-deficient diene **3** (0.2 mmol),  $(PPh_3)_4RuCl_2$  (0.003 mmol, 3.7 mg, 1.5 mol%), dppe (0.006 mmol, 2.4 mg, 3.0 mol%), and  $Na_2CO_3$  (0.01 mmol, 1.1 mg, 5.0 mol%) were charged. The vial was sealed and transferred into the glovebox and charged with hydrazone solution **2** (1.25 M THF solution, 240  $\mu$ L, 1.5 equiv), CsF (0.2 mmol, 30.4 mg, 1.0 equiv), and dry THF (100  $\mu$ L). The vial was sealed with aluminum seals with PTFE-faced silicone septa, under an atmosphere of nitrogen. The mixture was stirred for 16 h under  $N_2$  at 60 °C. After completion, the solution was filtered by celite with DCM as eluent, concentrated, and purified by silica gel thin-layer chromatography (TLC) to give the corresponding product.

### 2.3 General procedure for the enantioselective 1,6-addition reaction

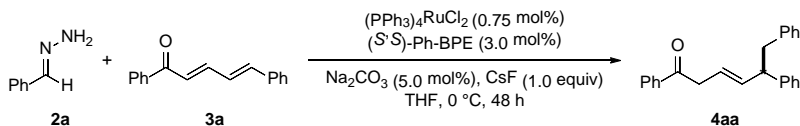

In a flame-dried or oven-dried V-shaped microwave reaction vial (2.0 mL) equipped with a Teflon-coated magnetic stirring bar, electron-deficient diene **3a** (0.2 mmol, 46.8 mg),  $(PPh_3)_4RuCl_2$  (0.0015 mmol, 1.8 mg, 0.75 mol%), and  $Na_2CO_3$  (0.01 mmol, 1.1 mg, 5.0 mol%) were charged. The vial was sealed and transferred into the glovebox and charged with hydrazone solution **2a** (1.25 M THF solution, 320  $\mu$ L, 2.0 equiv), (*S,S*)-Ph-BPE (0.006 mmol, 3.0 mg, 3.0 mol%), CsF (0.2 mmol, 30.4 mg, 1.0 equiv), and dry THF (100  $\mu$ L). The vial was sealed with aluminum seals with PTFE-faced silicone septa, under a nitrogen atmosphere. The mixture was stirred for 48 h under  $N_2$  at 0 °C. After completion, the solution was filtered by celite with DCM as eluent, concentrated, and purified by silica gel TLC to give the corresponding product. The enantiomeric excess (ee %) was determined by HPLC.

### 2.4 Gram-scale synthesis of **4a**

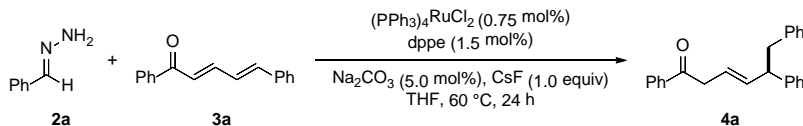

In a flame-dried screw-capped pressure reaction vial (15 mL) equipped with a Teflon-coated magnetic stirring bar, electron-deficient diene **3a** (5 mmol, 1.17 g),  $(PPh_3)_4RuCl_2$  (0.0375 mmol, 45.9 mg, 0.75 mol%), dppe (0.075 mmol,

29.9 mg, 1.5 mol%), and  $\text{Na}_2\text{CO}_3$  (0.25 mmol, 26.5 mg, 5.0 mol%) were charged. The vial was sealed and transferred into the glovebox, and charged with hydrazone solution **2a** (1.25 M THF solution, 6.0 mL, 1.5 equiv), CsF (5 mmol, 759.5 mg, 1.0 equiv), and dry THF (2.5 mL). The vial was sealed with a rubber O-ring attached screwcap under a nitrogen atmosphere. The mixture was stirred for 24 h under  $\text{N}_2$  at 60 °C. After completion, the reaction mixture was then filtered by celite with DCM as eluent, concentrated, and purified by automated flash column chromatography (hexanes/ethyl acetate 9:1) to give the desired product **4a** as yellow crystal (1.45 g, 89% yield).

### 3. Optimization for the Reaction Conditions

**Table S1.** Evaluation of different bases<sup>a</sup>

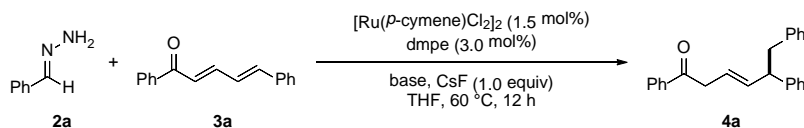

| Entry | Base (5.0 mol%)                 | Yield (%) |
|-------|---------------------------------|-----------|
| 1     | KOtBu                           | 48        |
| 2     | LiOtBu                          | 47        |
| 3     | K <sub>3</sub> PO <sub>4</sub>  | 52        |
| 4     | CaCO <sub>3</sub>               | 58        |
| 5     | K <sub>2</sub> CO <sub>3</sub>  | 57        |
| 6     | Cs <sub>2</sub> CO <sub>3</sub> | 55        |
| 7     | Na <sub>2</sub> CO <sub>3</sub> | 62        |
| 8     | -                               | 15        |

<sup>a</sup>Reaction conditions: **2a** (1.25 M THF solution, 1.5 equiv), **3a** (0.2 mmol),  $[\text{Ru}(\textit{p}\text{-cymene})\text{Cl}_2]_2$  (0.003 mmol, 1.5 mol%), dmpe (0.006 mmol, 3.0 mol%), base (0.01 mmol, 5.0 mol%), CsF (0.2 mmol, 1.0 equiv), dry THF (100  $\mu\text{L}$ ), 60 °C, 12 h, and under N<sub>2</sub>. Yields determined by crude <sup>1</sup>H NMR using mesitylene as an internal standard.

**Table S2.** Evaluation of catalyst<sup>a</sup>

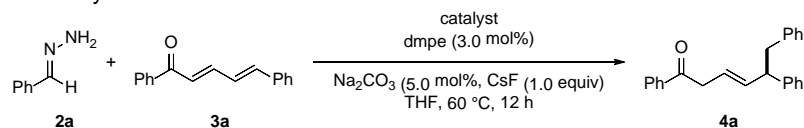

| Entry | Catalyst (1.5 mol%)                                  | Yield (%) |
|-------|------------------------------------------------------|-----------|
| 1     | $[\text{Ru}(\textit{p}\text{-cymene})\text{Cl}_2]_2$ | 62        |
| 2     | $[\text{Ru}(\text{COD})\text{Cl}_2]_n$               | 56        |
| 3     | (PPh <sub>3</sub> ) <sub>4</sub> RuCl <sub>2</sub>   | 66        |
| 4     | $[\text{Rh}(\textit{nbd})\text{Cl}]_2$               | 7         |
| 5     | $[\text{Rh}(\text{COD})\text{Cl}]_2$                 | 7         |
| 6     | $[\text{Cp}^*\text{RhCl}_2]_2$                       | 20        |
| 7     | $[\text{Cp}^*\text{IrCl}_2]_2$                       | 15        |

<sup>a</sup>Reaction conditions: **2a** (1.25 M THF solution, 1.5 equiv), **3a** (0.2 mmol), catalyst (0.003 mmol, 1.5 mol%), dmpe (0.006 mmol, 3.0 mol%), Na<sub>2</sub>CO<sub>3</sub> (0.01 mmol, 5.0 mol%), CsF (0.2 mmol, 1.0 equiv), dry THF (100  $\mu\text{L}$ ), 60 °C, 12 h, and under N<sub>2</sub>. Yields determined by crude <sup>1</sup>H NMR using mesitylene as an internal standard.

**Table S3.** Evaluation of ligands<sup>a</sup>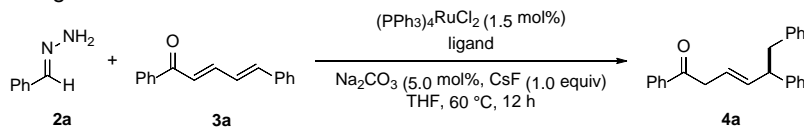

| Entry | Ligand (3.0 mol %) | Yield (%) |
|-------|--------------------|-----------|
| 1     | SL1                | 30        |
| 2     | SL2                | 66        |
| 3     | SL3                | 51        |
| 4     | SL4                | 53        |
| 5     | SL5                | 86        |
| 6     | SL6                | 56        |
| 7     | SL7                | 61        |
| 8     | SL8                | 43        |
| 9     | SL9                | 54        |

<sup>a</sup>Reaction conditions: **2a** (1.25 M THF solution, 1.5 equiv), **3a** (0.2 mmol), (PPh<sub>3</sub>)<sub>4</sub>RuCl<sub>2</sub> (0.003 mmol, 1.5 mol%), ligand (0.006 mmol, 3.0 mol%), Na<sub>2</sub>CO<sub>3</sub> (0.01 mmol, 5.0 mol%), CsF (0.2 mmol, 1.0 equiv), dry THF (100 μL), 60 °C, 12 h, and under N<sub>2</sub>. Yields determined by crude <sup>1</sup>H NMR using mesitylene as an internal standard.

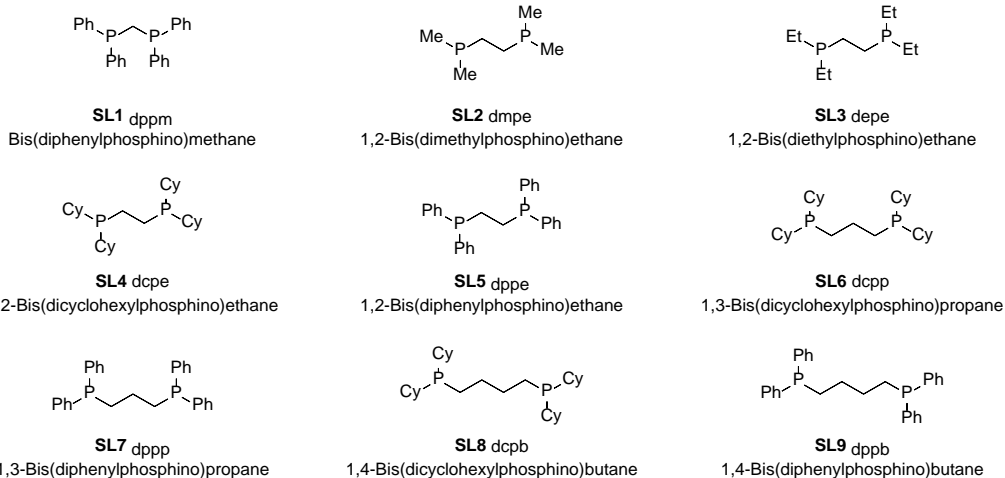**Figure S1.** Ligands in Tables S3.

**Table S4.** Evaluation of different experimental parameters<sup>a</sup>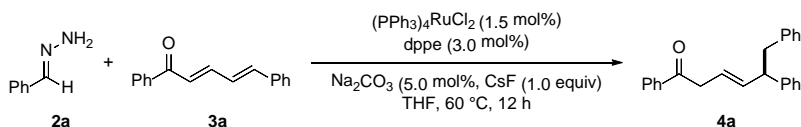

| Entry | Variation from conditions above | Yield (%) |
|-------|---------------------------------|-----------|
| 1     | none                            | 86        |
| 2     | 10 h                            | 70        |
| 3     | 16 h                            | 96        |
| 4     | no CsF                          | n.d.      |
| 5     | CsF (0.50 equiv)                | 75        |
| 6     | CsF (1.50 equiv)                | 78        |
| 7     | 40 °C                           | 60        |
| 8     | 80 °C                           | 72        |
| 9     | diethyl ether                   | 60        |
| 10    | 1,4-dioxane                     | 65        |
| 11    | 2-methyltetrahydrofuran         | 70        |

<sup>a</sup>Reaction conditions: **2a** (1.25 M THF solution, 1.5 equiv), **3a** (0.2 mmol),  $(\text{PPh}_3)_4\text{RuCl}_2$  (0.003 mmol, 1.5 mol%), dppe (0.006 mmol, 3.0 mol%),  $\text{Na}_2\text{CO}_3$  (0.01 mmol, 5.0 mol%), CsF (0.2 mmol, 1.0 equiv), dry THF (100  $\mu\text{L}$ ), 60 °C, 12 h, and under  $\text{N}_2$ . Yields determined by crude  $^1\text{H}$  NMR using mesitylene as an internal standard.

**Table S5.** Evaluation of asymmetric reaction conditions<sup>a</sup>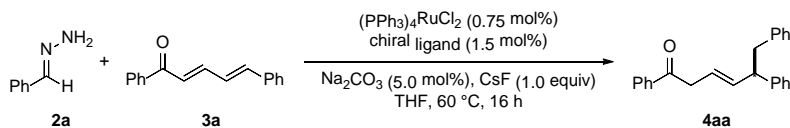

| Entry           | Chiral ligand | ee (%) | Yield (%) |
|-----------------|---------------|--------|-----------|
| 1               | SCL1          | 0      | 51        |
| 2               | SCL2          | 0      | 43        |
| 3               | SCL3          | 0      | 54        |
| 4               | SCL4          | 0      | 28        |
| 5               | SCL5          | 0      | 46        |
| 6               | SCL6          | 0      | 55        |
| 7               | SCL7          | 0      | 91        |
| 8               | SCL8          | 0      | 52        |
| 9               | SCL9          | 19     | 59        |
| 10 <sup>b</sup> | SCL9          | 44     | 55        |
| 11 <sup>c</sup> | SCL9          | 98     | 28        |

<sup>a</sup>Reaction conditions: **2a** (1.25 M THF solution, 1.5 equiv), **3a** (0.2 mmol),  $(\text{PPh}_3)_4\text{RuCl}_2$  (0.0015 mmol, 0.75 mol%), CL (0.003 mmol, 1.5 mol%),  $\text{Na}_2\text{CO}_3$  (0.01 mmol, 5.0 mol%), CsF (0.2 mmol, 1.0 equiv), dry THF (100  $\mu\text{L}$ ), 60 °C, 16 h, and under  $\text{N}_2$ . Yields determined by crude  $^1\text{H}$  NMR using mesitylene as an internal standard. <sup>b</sup>40 °C. <sup>c</sup>0 °C, 48 h, **2a** (1.25 M THF solution, 2.0 equiv), SCL9 3.0 mol%.



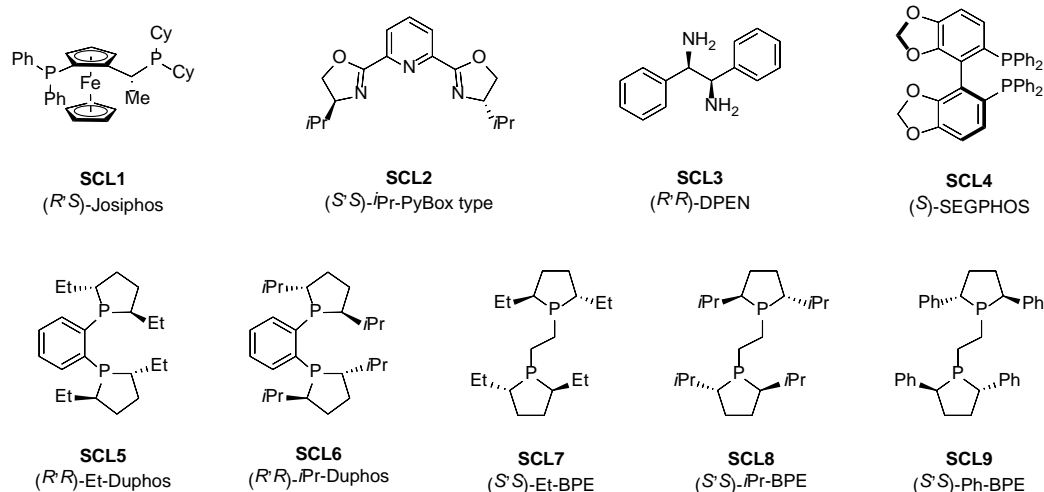

**Figure S2.** Chiral ligands in Table S5.

#### 4. Synthesis of Starting Materials

The general procedures are demonstrated by the synthesis of (*E,E*)-cinnamylideneacetophenone, and other conjugated ketones are synthesized in similar methods with the appropriate substitution of acetophenone or cinnamaldehyde. The starting materials **3l** and **3m** are synthesized following a different method according to reported literature.<sup>3</sup>

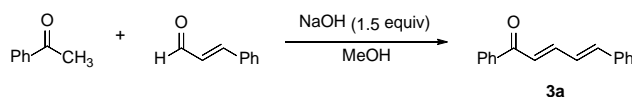

Synthesis of (*E,E*)-cinnamylideneacetophenone (**3a**): The methods used were according to reported literature.<sup>1,2</sup> To a 50 mL round-bottom flask charged with a magnetic stir bar, acetophenone (4.0 mmol, 466.6  $\mu$ L), 20 mL methanol, and sodium hydroxide (6 mmol, 240 mg, 1.5 equiv) were slowly added and cooled to 0  $^{\circ}$ C. After cooling the solution to 0  $^{\circ}$ C, cinnamaldehyde (4.8 mmol, 604.1  $\mu$ L, 1.2 equiv) was added dropwise under constant stirring. The mixture was brought to room temperature and stirred for an additional 20 h. After completion of the reaction, the mixture was quenched by water and dilute hydrochloric acid (1 M). The obtained precipitate was filtered, washed with cooled methanol, and purified by silica gel chromatography. The purity of the product was determined by  $^1$ H NMR and recrystallized from ethanol if needed. The **3a** was isolated as yellow crystals (80% yield) and shown to match analytical data to those previously reported.<sup>1,2</sup>

#### 5. Chemoselective Competition Experiment

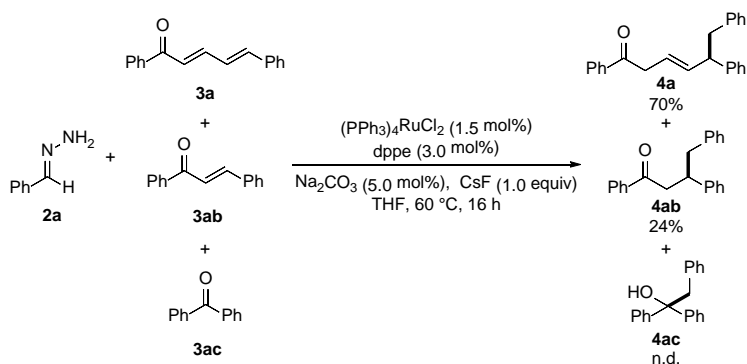

A competition experiment was designed with a 1:1:1 mixture of (*E,E*)-cinnamylideneacetophenone (**3a**), (*E*)-chalcone (**3ab**), and benzophenone (**3ac**). In a flame-dried or oven-dried V-shaped microwave reaction vial (2 mL) equipped with a Teflon-coated magnetic stirring bar, **3a** (0.1 mmol, 23.4 mg, 1.0 equiv), **3ab** (0.1 mmol, 20.8 mg, 1.0 equiv), **3ac** (0.1 mmol, 18.2 mg, 1.0 equiv), (PPh<sub>3</sub>)<sub>4</sub>RuCl<sub>2</sub> (0.0015 mmol, 1.8 mg, 1.5 mol%), dppe (0.003 mmol, 1.2 mg, 3.0 mol%), and Na<sub>2</sub>CO<sub>3</sub> (0.005 mmol, 0.5 mg, 5.0 mol%) were charged. The vial was transferred into the glovebox and charged with hydrazone solution (1.25M, 80 μL, 1.0 equiv), CsF (0.1 mmol, 15.2 mg, 1.0 equiv), and 100 μL of dry THF and then sealed with a PTEF-faced silicone septum under N<sub>2</sub> atmosphere. The reaction system was then heated to 60 °C in an oil bath. After completion, the solution was filtered by celite, concentrated, and the yield was determined by <sup>1</sup>H NMR with dibromomethane as the internal standard (**4a** 70%, **4ab** 24%, and **4ac** n.d.), we observed high chemoselectivity for the 1,6-addition.

## 6. Deuterium-Labeling Studies

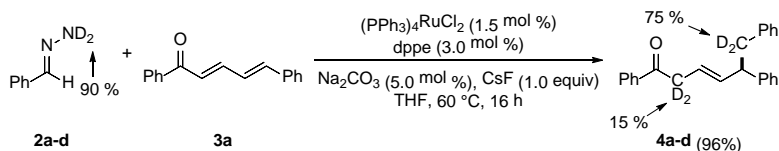

The deuterated hydrazone **2a-d** was synthesized according to the literature.<sup>4</sup> Hydrazone **2-d** (90% D): <sup>1</sup>H NMR (500 MHz, CDCl<sub>3</sub>) δ 7.75 (s, 1H), 7.56 – 7.54 (m, 2H), 7.37 – 7.33 (m, 2H), 7.32 – 7.28 (m, 1H), 5.49 (br, 0.20H). <sup>2</sup>H NMR (77 MHz, CDCl<sub>3</sub>) δ 5.45

The other operations were following the general procedures at 0.1 mmol scale. **4a-d** (31.2 mg, 96%). Isolated by preparative TLC. Percent deuterium (% D) incorporation was depicted as the amount of deuterium in place of the combined hydrogen atoms at that site. **4a-d**: <sup>1</sup>H NMR (500 MHz, CDCl<sub>3</sub>): 7.89 – 7.85 (m, 2H), 7.56 – 7.53 (m, 1H), 7.48 – 7.44 (m, 2H), 7.30 – 7.27 (m, 5H), 7.22 – 7.17 (m, 5H), 6.33 – 6.29 (m, 1H), 6.18 – 6.13 (m, 1H), 3.26 (dt, *J* = 8.1, 6.7 Hz, 1H), 3.10 – 3.04 (m, 1.70H), 2.90 – 2.83 (m, 0.50H). HRMS (ESI +ve, *m/z*) Calculated for C<sub>24</sub>H<sub>20</sub>D<sub>2</sub>ONa [M+Na]<sup>+</sup> 351.1688; found: 351.1685. Deuterium incorporation was determined by <sup>1</sup>H NMR.

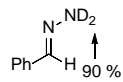

2a-d

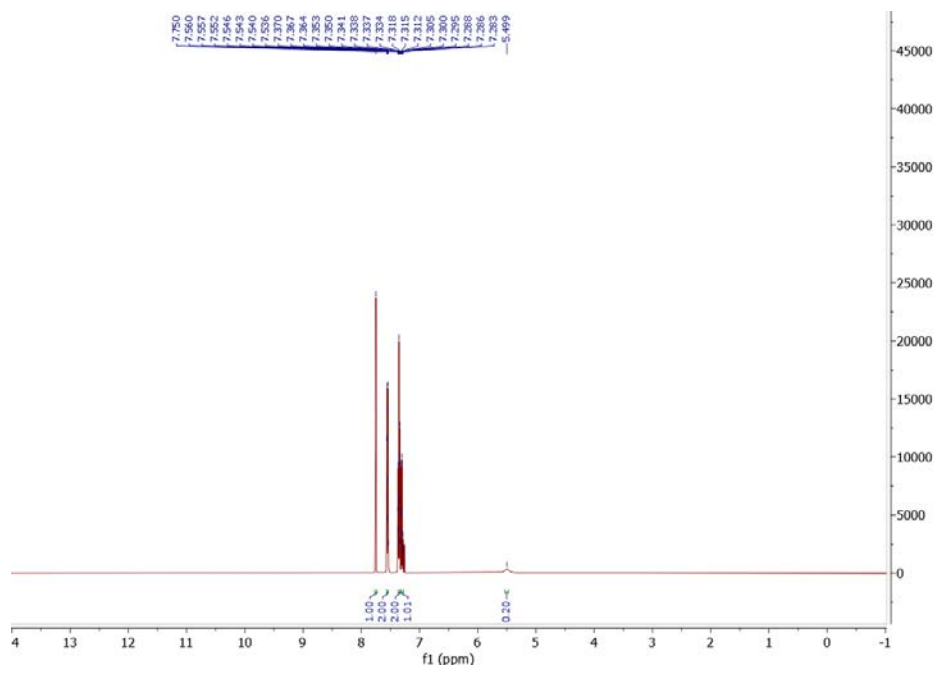

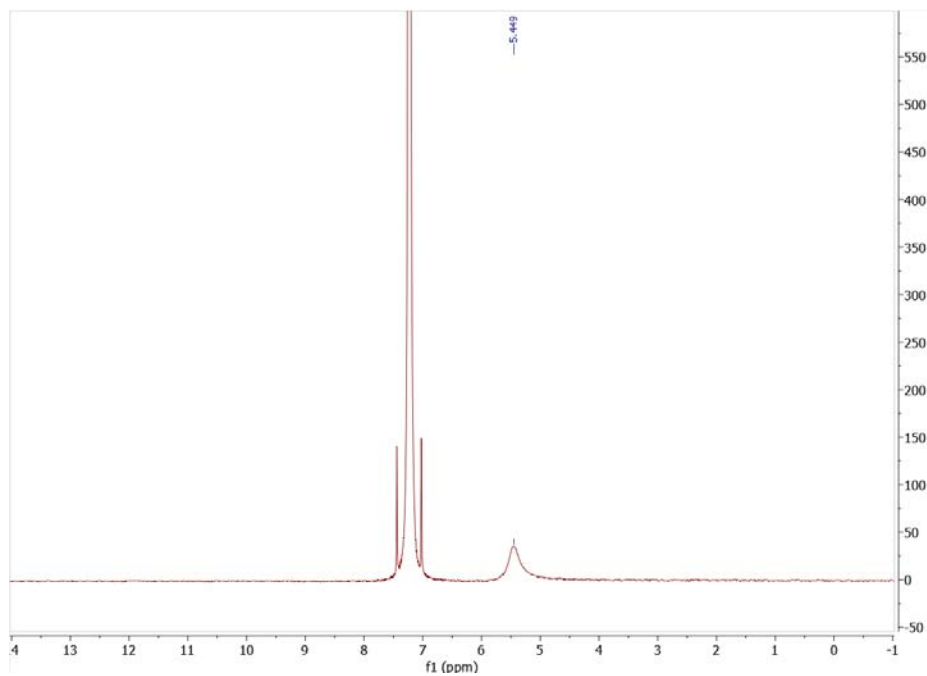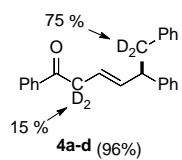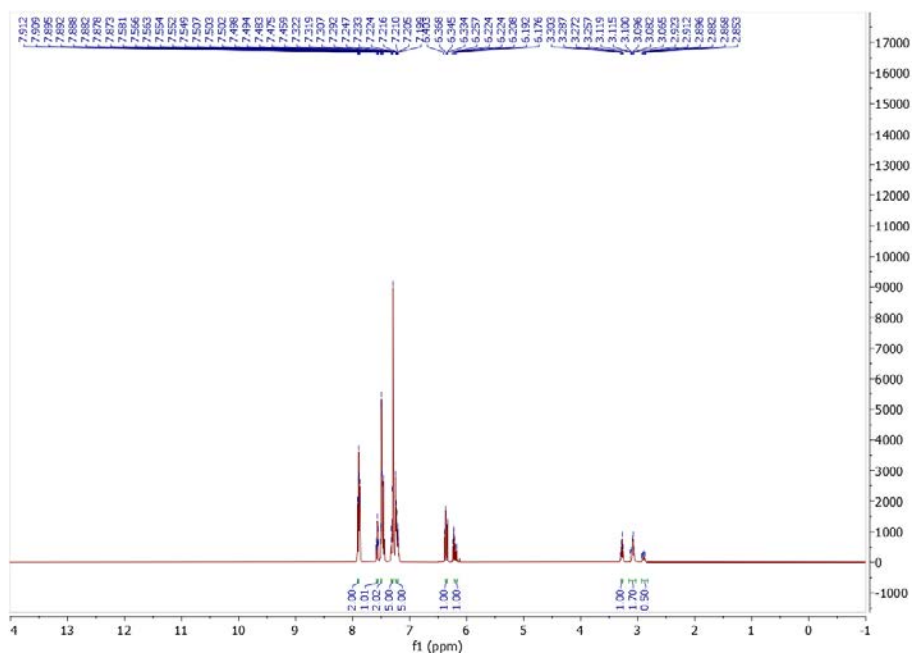

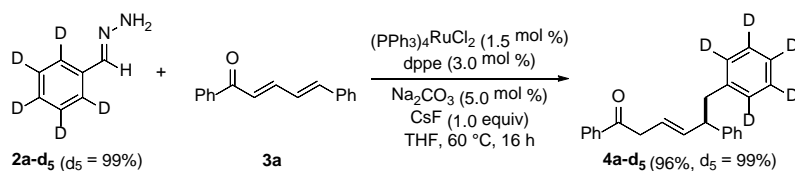

The deuterated hydrazone **2a-d<sub>5</sub>** was synthesized according to the literature.<sup>4</sup> Hydrazone **2-d<sub>5</sub>** (99% D): <sup>1</sup>H NMR (500 MHz, CDCl<sub>3</sub>) δ 7.90 (s, 0.01H), 7.75 (s, 1H), 7.59 (s, 0.01H), 7.36 (s, 0.01H), 5.52 (br, 2H). <sup>2</sup>H NMR (77 MHz, CDCl<sub>3</sub>) δ 7.89, 7.56, 7.38.

The other operations were following the general procedures at 0.1 mmol scale. **4a-d<sub>5</sub>** (31.8 mg, 96%). Isolated by preparative TLC. Percent deuterium (% D) incorporation was depicted as the amount of deuterium in place of the combined hydrogen atoms at that site. **4a-d<sub>5</sub>**: <sup>1</sup>H NMR (500 MHz, CDCl<sub>3</sub>): 7.87 (dd,  $J = 8.4, 1.3$  Hz, 2H), 7.55 – 7.51 (m, 1H), 7.44 – 7.41 (m, 2H), 7.26 – 7.25 (m, 4H), 7.19 – 7.16 (m, 1H), 6.29 (dd,  $J = 15.9, 8.0$  Hz, 1H), 6.15 (dt,  $J = 15.9, 7.2$  Hz, 1H), 3.26 (dt,  $J = 8.1, 6.7$  Hz, 1H), 3.06 (d,  $J = 7.2$  Hz, 2H), 2.86 (d,  $J = 6.7$  Hz, 2H). HRMS (ESI +ve,  $m/z$ ) Calculated for C<sub>24</sub>H<sub>17</sub>D<sub>5</sub>ONa [M+Na]<sup>+</sup> 354.1877; found: 354.1883. Deuterium incorporation was determined by <sup>1</sup>H NMR.

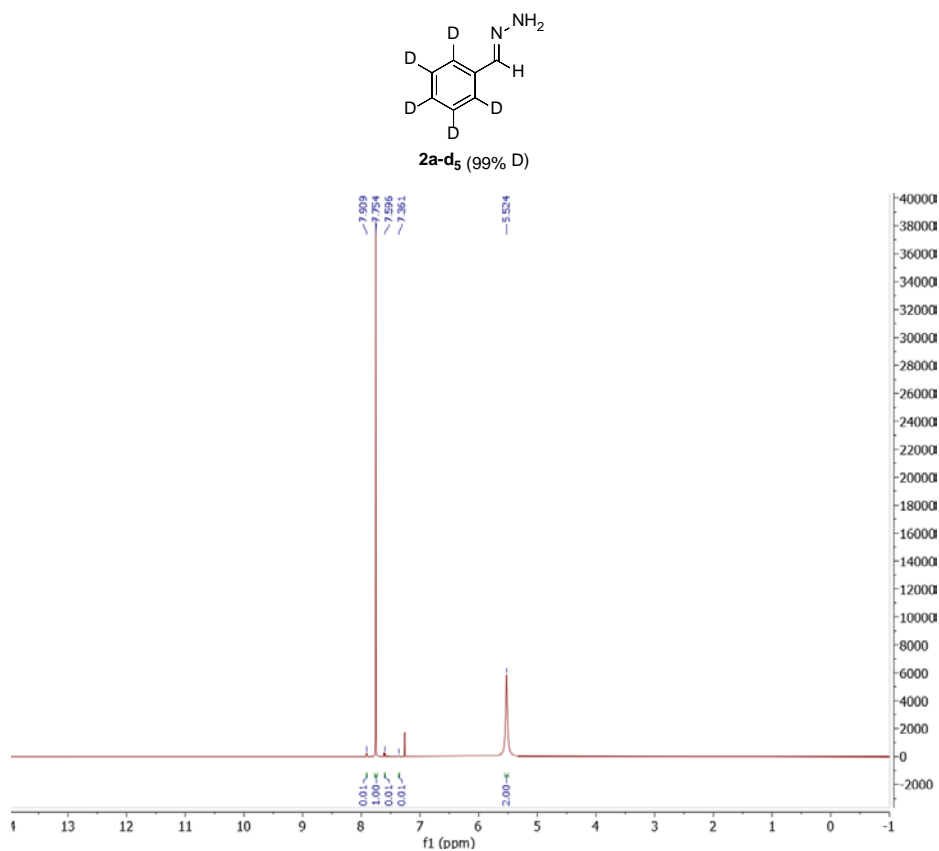



## 7. <sup>13</sup>C-Labeling Study

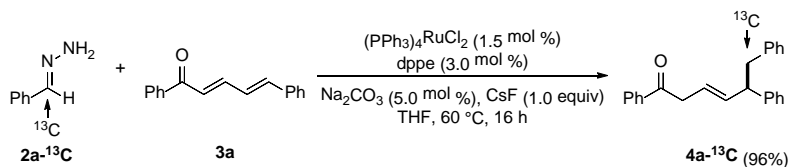

Hydrazone **2a-<sup>13</sup>C**: <sup>1</sup>H NMR (500 MHz, CDCl<sub>3</sub>) δ 7.75 (d,  $J = 156$  Hz, 1H), 7.59 – 7.53 (m, 2H), 7.37 – 7.33 (m, 2H), 7.32 – 7.27 (m, 1H), 5.52 (br, 2H).

The other operations were following the general procedures at 0.1 mmol scale. **4a-<sup>13</sup>C** (31.2 mg, 96%). Isolated by preparative TLC. **4a-<sup>13</sup>C**: <sup>1</sup>H NMR (500 MHz, CDCl<sub>3</sub>): 7.88 (dd,  $J = 8.4, 1.3$  Hz, 2H), 7.56 – 7.52 (m, 1H), 7.45 – 7.42 (m, 2H), 7.35 – 7.27 (m, 5H), 7.24 – 7.16 (m, 5H), 6.29 (dd,  $J = 15.9, 8.1$  Hz, 1H), 6.19 – 6.15 (m, 1H), 3.26 (dt,  $J = 8.1, 6.7$  Hz, 1H), 3.09 (d,  $J = 7.2$  Hz, 2H), 3.00 – 2.72 (m, 2H).

<sup>13</sup>C NMR (126 MHz, CDCl<sub>3</sub>) δ 199.2, 139.4, 137.4, 137.2, 132.9, 132.7, 130.2, 129.4, 129.4, 128.5, 128.4, 128.4, 128.3, 128.0, 127.1, 126.2, 126.1, 42.9, 41.4, 40.4. HRMS (ESI +ve,  $m/z$ ) Calculated for C<sub>23</sub><sup>13</sup>CH<sub>22</sub>ONa [M+Na]<sup>+</sup> 350.1596; found: 350.1603.

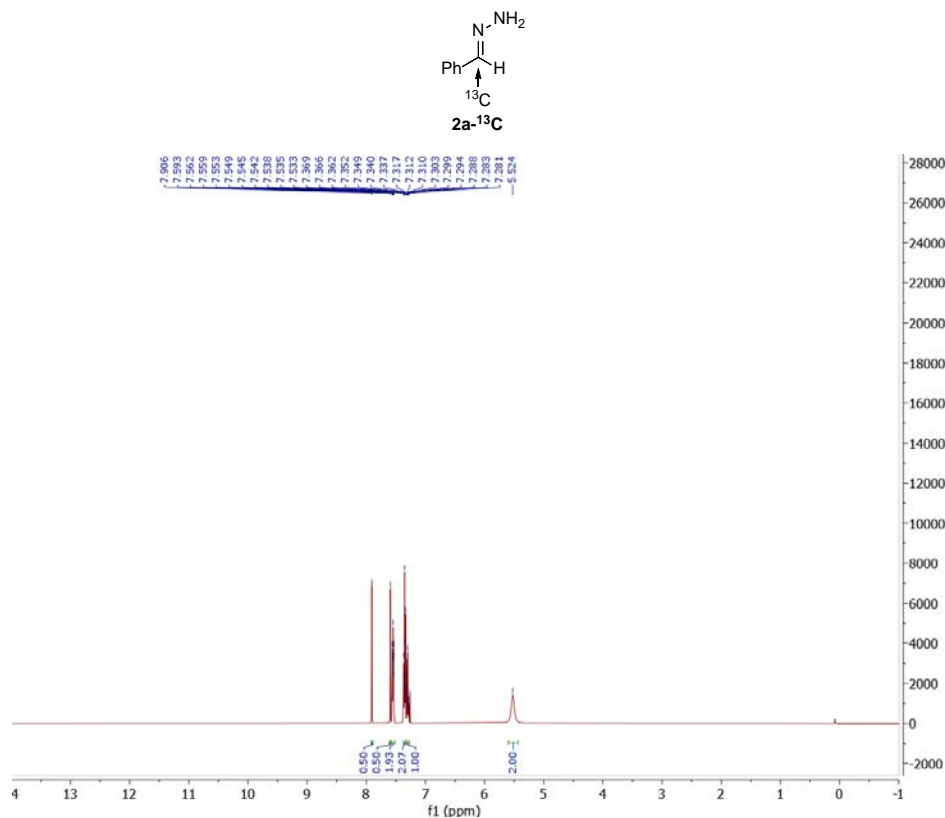

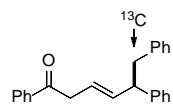

4a-<sup>13</sup>C

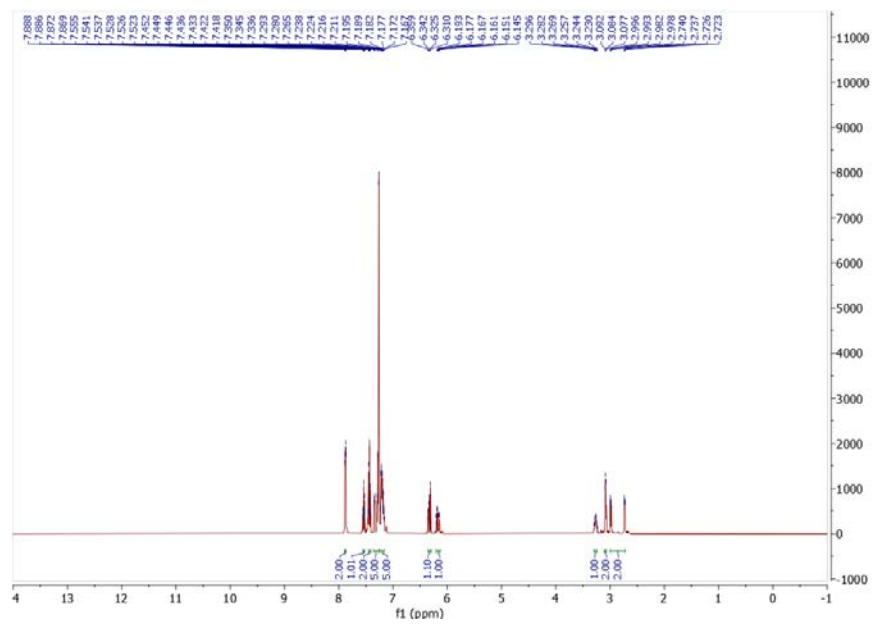



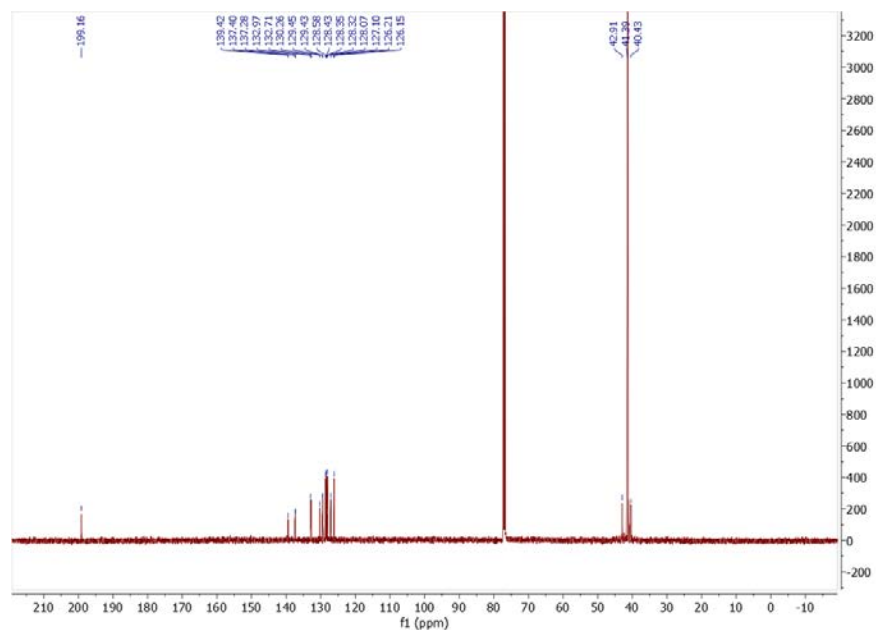

## 8. Product and Starting Material Characterization

### 8.1 1,6-conjugate addition electrophilic substrates

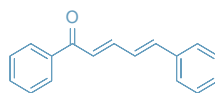

**3a**

#### (2*E*,4*E*)-1,5-diphenylpenta-2,4-dien-1-one (**3a**)

Appearance: Yellow solid

**<sup>1</sup>H NMR** (500 MHz, CDCl<sub>3</sub>) δ 8.03 – 7.98 (m, 2H), 7.65 – 7.57 (m, 2H), 7.53 – 7.49 (m, 4H), 7.41 – 7.33 (m, 3H), 7.13 – 7.08 (m, 1H), 7.07 – 7.03 (m, 2H).

**<sup>13</sup>C NMR** (126 MHz, CDCl<sub>3</sub>) δ 190.5, 144.8, 141.9, 138.2, 136.1, 132.6, 129.2, 128.8, 128.6, 128.4, 127.3, 126.9, 125.4.

**HRMS** (APCI +ve, *m/z*) Calculated for C<sub>17</sub>H<sub>15</sub>O [M+H]<sup>+</sup> 235.1117; found: 235.1119.

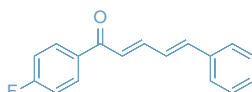

**3b**

#### (2*E*,4*E*)-1-(4-fluorophenyl)-5-phenylpenta-2,4-dien-1-one (**3b**)

Appearance: Yellow solid

**<sup>1</sup>H NMR** (500 MHz, CDCl<sub>3</sub>) δ 8.07 – 8.00 (m, 2H), 7.66 – 7.61 (m, 1H), 7.53 – 7.51 (m, 2H), 7.42 – 7.34 (m, 3H), 7.21 – 7.15 (m, 2H), 7.11 – 7.03 (m, 3H).

**<sup>13</sup>C NMR** (126 MHz, CDCl<sub>3</sub>) δ 188.8, 165.5 (d, *J* = 254.1 Hz), 145.1, 142.2, 136.1, 134.5 (d, *J* = 3.0 Hz), 131.0 (d, *J* = 9.1 Hz), 129.3, 128.9, 127.4, 126.8, 124.9, 115.7 (d, *J* = 22.3 Hz).

**HRMS** (ESI +ve, *m/z*) Calculated for C<sub>17</sub>H<sub>13</sub>FONa [M+Na]<sup>+</sup> 275.0847; found: 275.0843.

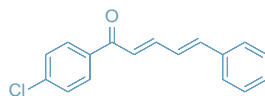

3c

(2*E*,4*E*)-1-(4-chlorophenyl)-5-phenylpenta-2,4-dien-1-one (**3c**)

Appearance: Yellow solid

**<sup>1</sup>H NMR** (500 MHz, CDCl<sub>3</sub>) δ 8.00 – 7.90 (m, 2H), 7.85 – 7.74 (m, 1H), 7.66 – 7.61 (m, 1H), 7.55 – 7.51 (m, 2H), 7.42 – 7.37 (m, 4H), 7.06 – 7.05 (m, 2H), 6.63 – 6.44 (m, 1H).

**<sup>13</sup>C NMR** (126 MHz, CDCl<sub>3</sub>) δ 189.1, 145.3, 142.4, 139.0, 136.5, 136.0, 129.8, 129.3, 128.9, 128.9, 127.3, 126.7, 124.8.

**HRMS** (APCI +ve, *m/z*) Calculated for C<sub>17</sub>H<sub>14</sub>ClO [M+H]<sup>+</sup> 269.0725; found: 269.0728.

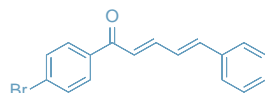

3d

(2*E*,4*E*)-1-(4-bromophenyl)-5-phenylpenta-2,4-dien-1-one (**3d**)

Appearance: Yellow solid

**<sup>1</sup>H NMR** (500 MHz, CDCl<sub>3</sub>) δ 7.9 – 7.83 (m, 2H), 7.72 – 7.70 (m, 1H), 7.67 – 7.65 (m, 2H), 7.57 – 7.53 (m, 2H), 7.43 – 7.37 (m, 4H), 7.08 – 7.05 (m, 1H), 6.58 – 6.51 (m, 1H).

**<sup>13</sup>C NMR** (126 MHz, CDCl<sub>3</sub>) δ 189.3, 145.4, 142.4, 136.9, 136.0, 131.9, 129.9, 129.3, 128.9, 127.7, 127.3, 126.7, 124.7.

**HRMS** (APCI +ve, *m/z*) Calculated for C<sub>17</sub>H<sub>14</sub>BrO [M+H]<sup>+</sup> 313.0223; found: 313.0220.

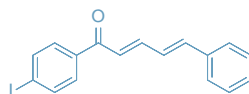

3e

(2*E*,4*E*)-1-(4-iodophenyl)-5-phenylpenta-2,4-dien-1-one (**3e**)

Appearance: Yellow solid

**<sup>1</sup>H NMR** (500 MHz, CDCl<sub>3</sub>) δ 7.92 – 7.84 (m, 2H), 7.74 – 7.69 (m, 2H), 7.66 – 7.61 (m, 1H), 7.56 – 7.52 (m, 2H), 7.47 – 7.29 (m, 4H), 7.08 – 7.01 (m, 2H).

**<sup>13</sup>C NMR** (126 MHz, CDCl<sub>3</sub>) δ 189.6, 145.4, 142.4, 137.9, 137.5, 136.0, 129.8, 129.3, 128.9, 127.3, 126.8, 124.7, 100.4.

**HRMS** (ESI +ve, *m/z*) Calculated for C<sub>17</sub>H<sub>13</sub>IO<sub>2</sub>Na [M+Na]<sup>+</sup> 382.9903; found: 382.9902.

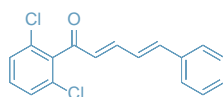

3f

(2*E*,4*E*)-1-(2,6-dichlorophenyl)-5-phenylpenta-2,4-dien-1-one (**3f**)

Appearance: Yellow solid

**<sup>1</sup>H NMR** (500 MHz, CDCl<sub>3</sub>) δ 7.50 – 7.48 (m, 2H), 7.41 – 7.31 (m, 6H), 7.08 – 6.92 (m, 3H), 6.62 – 6.42 (m, 1H).

**<sup>13</sup>C NMR** (126 MHz, CDCl<sub>3</sub>) δ 192.7, 147.7, 143.0, 138.0, 135.7, 131.9, 130.5, 129.7, 129.6, 128.9, 128.2, 127.5, 126.5.

**HRMS** (ESI +ve, *m/z*) Calculated for C<sub>17</sub>H<sub>12</sub>Cl<sub>2</sub>ONa [M+Na]<sup>+</sup> 325.0167; found: 325.0157.

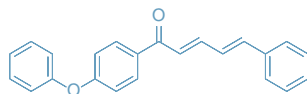

3g

(2*E*,4*E*)-1-(4-phenoxyphenyl)-5-phenylpenta-2,4-dien-1-one (**3g**)

Appearance: Yellow solid

**<sup>1</sup>H NMR** (500 MHz, CDCl<sub>3</sub>) δ 8.09 – 7.95 (m, 2H), 7.66 – 7.61 (m, 1H), 7.59 – 7.47 (m, 2H), 7.47 – 7.32 (m, 5H), 7.25 – 7.22 (m, 1H), 7.22 – 6.90 (m, 7H).

**<sup>13</sup>C NMR** (126 MHz, CDCl<sub>3</sub>) δ 188.8, 161.7, 155.6, 144.4, 141.7, 136.2, 132.8, 130.7, 130.1, 129.2, 128.9, 127.3, 127.0, 125.1, 124.6, 120.1, 117.4.

**HRMS** (APCI +ve, *m/z*) Calculated for C<sub>23</sub>H<sub>19</sub>O<sub>2</sub> [M+H]<sup>+</sup> 327.1380; found: 327.1367.

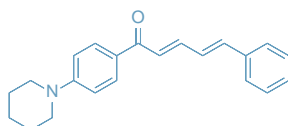

3h

(2*E*,4*E*)-5-phenyl-1-(4-(piperidin-1-yl)phenyl)penta-2,4-dien-1-one (**3h**)

Appearance: Yellow solid

**<sup>1</sup>H NMR** (500 MHz, CDCl<sub>3</sub>) δ 7.99 – 7.94 (m, 2H), 7.63 – 7.58 (m, 1H), 7.53 – 7.51 (m, 2H), 7.41 – 7.32 (m, 3H), 7.19 – 6.88 (m, 5H), 3.42 – 3.40 (m, 4H), 1.69 – 1.61 (m, 6H).

**<sup>13</sup>C NMR** (126 MHz, CDCl<sub>3</sub>) δ 187.8, 154.3, 142.8, 140.5, 136.4, 130.6, 128.8, 128.8, 127.3, 127.3, 127.1, 125.6, 113.3, 48.6, 25.4, 24.3.

**HRMS** (APCI +ve, *m/z*) Calculated for C<sub>22</sub>H<sub>24</sub>NO [M+H]<sup>+</sup> 318.1780; found: 318.1790.

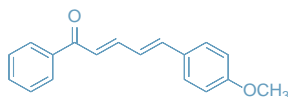

3i

(2*E*,4*E*)-5-(4-methoxyphenyl)-1-phenylpenta-2,4-dien-1-one (**3i**)

Appearance: Yellow solid

**<sup>1</sup>H NMR** (500 MHz, CDCl<sub>3</sub>) δ 8.02 – 7.97 (m, 2H), 7.65 – 7.56 (m, 2H), 7.52 – 7.45 (m, 4H), 7.09 – 6.90 (m, 5H), 3.84 (s, 3H).

**<sup>13</sup>C NMR** (126 MHz, CDCl<sub>3</sub>) δ 190.5, 160.6, 145.4, 141.8, 138.4, 132.5, 128.9, 128.8, 128.5, 128.3, 124.8, 124.2, 114.3, 55.3.

**HRMS** (ESI +ve, *m/z*) Calculated for C<sub>18</sub>H<sub>16</sub>ONa [M+Na]<sup>+</sup> 271.1093; found: 271.1105.

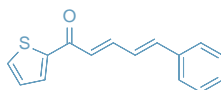

3j

(2*E*,4*E*)-5-phenyl-1-(thiophen-2-yl)penta-2,4-dien-1-one (**3j**)

Appearance: Yellow solid

**<sup>1</sup>H NMR** (500 MHz, CDCl<sub>3</sub>) δ 7.83 (dd, *J* = 3.8, 1.2 Hz, 1H), 7.70 – 7.64 (m, 2H), 7.55 – 7.51 (m, 2H), 7.43 – 7.34 (m, 3H), 7.21 – 7.19 (m, 1H), 7.09–7.00 (m, 3H).

**<sup>13</sup>C NMR** (126 MHz, CDCl<sub>3</sub>) δ 182.1, 145.7, 144.0, 142.1, 136.1, 133.6, 131.5, 129.2, 128.8, 128.2, 127.3, 126.7, 125.0.

**HRMS** (APCI +ve, *m/z*) calculated for C<sub>15</sub>H<sub>13</sub>OS [M+H]<sup>+</sup> 241.0682m; found: 241.0672.

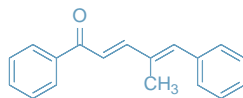

**3k**

(2*E*,4*E*)-4-methyl-1,5-diphenylpenta-2,4-dien-1-one (**3k**)

Appearance: Yellow solid

**<sup>1</sup>H NMR** (500 MHz, CDCl<sub>3</sub>) δ 8.03 – 8.02 (m, 2H), 7.68 (d, *J* = 15.3 Hz, 1H), 7.62 – 7.59 (m, 1H), 7.54 – 7.51 (m, 2H), 7.44 – 7.40 (m, 4H), 7.35 – 7.32 (m, 1H), 7.09 (d, *J* = 15.3 Hz, 1H), 7.00 (s, 1H), 2.20 (s, 3H).

**<sup>13</sup>C NMR** (126 MHz, CDCl<sub>3</sub>) δ 190.8, 150.2, 140.5, 138.5, 136.7, 134.7, 132.6, 129.5, 128.5, 128.4, 128.4, 127.9, 121.5, 13.9.

**HRMS** (ESI +ve, *m/z*) calculated for C<sub>18</sub>H<sub>16</sub>ONa [M+Na]<sup>+</sup> 271.1093; found: 271.1105.

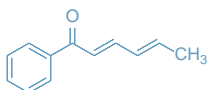

**3l**

(2*E*,4*E*)-1-phenylhexa-2,4-dien-1-one (**3l**)

Appearance: Yellow solid

**<sup>1</sup>H NMR** (500 MHz, CDCl<sub>3</sub>) δ 7.97 – 7.95 (m, 2H), 7.57 – 7.53 (m, 1H), 7.49 – 7.45 (m, 2H), 7.43 – 7.38 (m, 1H), 6.87 (d, *J* = 15.1 Hz, 1H), 6.37 – 6.23 (m, 2H), 1.90 (d, *J* = 6.4 Hz, 3H).

**<sup>13</sup>C NMR** (126 MHz, CDCl<sub>3</sub>) δ 191.0, 145.3, 141.1, 138.3, 132.5, 130.6, 128.5, 128.4, 123.4, 18.9.

**HRMS** (ESI +ve, *m/z*) calculated for C<sub>12</sub>H<sub>12</sub>ONa [M+Na]<sup>+</sup> 195.0780; found: 195.0784.

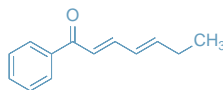

**3m**

(2*E*,4*E*)-1-phenylhepta-2,4-dien-1-one (**3m**)

Appearance: Yellow solid

**<sup>1</sup>H NMR** (500 MHz, CDCl<sub>3</sub>) δ 7.95 – 7.92 (m, 2H), 7.57 – 7.52 (m, 1H), 7.49 – 7.37 (m, 3H), 6.89 (d, *J* = 14.9 Hz, 1H), 6.35 – 6.23 (m, 2H), 2.28 – 2.21 (m, 2H), 1.08 (t, *J* = 7.4 Hz, 3H).

**<sup>13</sup>C NMR** (126 MHz, CDCl<sub>3</sub>) δ 191.0, 147.9, 145.5, 138.3, 132.5, 128.5, 128.4, 128.2, 123.6, 26.3, 12.9.

**HRMS** (ESI +ve, *m/z*) Calculated for C<sub>13</sub>H<sub>14</sub>ONa [M+Na]<sup>+</sup> 209.0937; found: 209.0940.

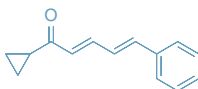

**3n**

(2*E*,4*E*)-1-cyclopropylhexa-2,4-dien-1-one (**3n**)

Appearance: Yellow solid

**<sup>1</sup>H NMR** (500 MHz, CDCl<sub>3</sub>) δ 7.53 – 7.47 (m, 2H), 7.45 – 7.32 (m, 4H), 7.02 – 6.87 (m, 2H), 6.45 (d, *J* = 15.4 Hz, 1H), 2.20 (tt, *J* = 7.8, 4.5 Hz, 1H), 1.18 – 1.13 (m, 2H), 0.99 – 0.95 (m, 2H).

**<sup>13</sup>C NMR** (126 MHz, CDCl<sub>3</sub>) δ 200.1, 142.0, 141.2, 136.1, 129.8, 129.1, 128.9, 127.2, 126.9, 19.55, 11.2.

**HRMS** (ESI +ve, *m/z*) calculated for C<sub>14</sub>H<sub>14</sub>ONa [M+Na]<sup>+</sup> 221.0937; found: 221.0944.

## 8.2 1,6-conjugate addition products

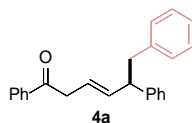

**4a**

(*E*)-1,5,6-triphenylhex-3-en-1-one (**4a**) (96%, 62.5 mg)

Appearance: Yellow solid

**<sup>1</sup>H NMR** (500 MHz, CDCl<sub>3</sub>) δ 7.88 – 7.86 (m, 2H), 7.56 – 7.52 (m, 1H), 7.46 – 7.41 (m, 2H), 7.29 – 7.26 (m, 5H), 7.24 – 7.12 (m, 5H), 6.28 (dd, *J* = 15.9, 8.1 Hz, 1H), 6.16 (dt, *J* = 15.9, 7.2 Hz, 1H), 3.26 (dt, *J* = 8.1, 6.7 Hz, 1H), 3.08 (d, *J* = 7.2 Hz, 2H), 2.86 (d, *J* = 6.7 Hz, 2H).

**<sup>13</sup>C NMR** (126 MHz, CDCl<sub>3</sub>) δ 199.1, 139.6, 137.4, 137.2, 132.9, 132.7, 130.2, 129.4, 128.5, 128.4, 128.3, 128.0, 127.1, 126.2, 126.1, 42.9, 41.3, 40.3.

**TLC** *R<sub>f</sub>* = 0.55 in hexanes/ethyl acetate 20:1

**HRMS** (ESI +ve, *m/z*) Calculated for C<sub>24</sub>H<sub>22</sub>ONa [M+Na]<sup>+</sup> 349.1563; found: 349.1574.

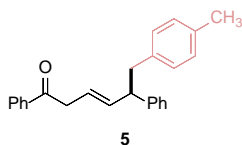

(*E*)-1,5-diphenyl-6-(*p*-tolyl)hex-3-en-1-one (**5**) (76%, 51.6 mg)

Appearance: Yellow solid

**<sup>1</sup>H NMR** (500 MHz, CDCl<sub>3</sub>) δ 7.89 – 7.87 (m, 2H), 7.75 – 7.73 (m, 2H), 7.56 – 7.52 (m, 1H), 7.46 – 7.42 (m, 2H), 7.29 – 7.27 (m, 1H), 7.20 – 7.16 (m, 1H), 7.13 – 7.04 (m, 5H), 6.41 – 6.33 (m, 1H), 6.20 – 6.13 (m, 1H), 3.25 (dt, *J* = 8.0, 7.0 Hz, 1H), 3.08 (d, *J* = 6.7 Hz, 2H), 2.87 – 2.78 (m, 2H), 2.32 (s, 3H).

**<sup>13</sup>C NMR** (126 MHz, CDCl<sub>3</sub>) δ 199.2, 141.6, 137.4, 137.3, 136.4, 135.6, 131.5, 129.3, 129.0, 128.5, 128.5, 128.4, 128.0, 127.0, 126.1, 42.8, 40.9, 40.3, 21.6.

**TLC** *R<sub>f</sub>* = 0.57 in hexanes/ethyl acetate 20:1

**HRMS** (ESI +ve, *m/z*) Calculated for C<sub>25</sub>H<sub>24</sub>ONa [M+Na]<sup>+</sup> 363.1719; found: 363.1729.

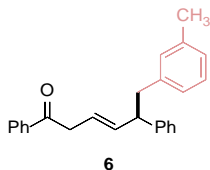

(*E*)-1,5-diphenyl-6-(*m*-tolyl)hex-3-en-1-one (**6**) (68%, 46.2 mg)

Appearance: Yellow solid

**<sup>1</sup>H NMR** (500 MHz, CDCl<sub>3</sub>) δ 7.89 – 7.87 (m, 2H), 7.56 – 7.52 (m, 1H), 7.45 – 7.40 (m, 2H), 7.30 – 7.27 (m, 3H), 7.20 – 7.14 (m, 3H), 7.04 – 7.01 (m, 3H), 6.41 – 6.33 (m, 1H), 6.24 – 6.16 (m, 1H), 3.26 (dt, *J* = 8.1, 6.8 Hz, 1H), 3.08 (d, *J* = 6.8 Hz, 2H), 2.87 – 2.78 (m, 2H), 2.31 (s, 3H).

**<sup>13</sup>C NMR** (126 MHz, CDCl<sub>3</sub>) δ 199.2, 139.5, 138.5, 137.8, 137.4, 137.3, 132.1, 128.8, 128.7, 128.5, 128.4, 128.2, 128.0, 127.0, 126.9, 126.4, 126.1, 42.8, 41.3, 40.3, 21.4.

**TLC** *R<sub>f</sub>* = 0.57 in hexanes/ethyl acetate 20:1

**HRMS** (ESI +ve, *m/z*) Calculated for C<sub>25</sub>H<sub>24</sub>ONa [M+Na]<sup>+</sup> 363.1719; found: 363.1723.

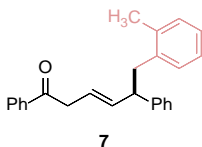

(*E*)-1,5-diphenyl-6-(*o*-tolyl)hex-3-en-1-one (**7**) (56%, 38.0 mg)

Appearance: Yellow solid

**<sup>1</sup>H NMR** (500 MHz, CDCl<sub>3</sub>) δ 7.88 (dd, *J* = 8.3, 1.3 Hz, 2H), 7.57 – 7.53 (m, 1H), 7.45 – 7.43 (m, 2H), 7.26 – 7.23 (m, 4H), 7.17 – 7.09 (m, 5H), 6.36 – 6.28 (m, 1H), 6.20 – 6.09 (m, 1H), 3.25 (dt, *J* = 8.1, 6.8 Hz, 1H), 3.14 (d, *J* = 6.7, 2H), 2.89 – 2.82 (m, 2H), 2.36 (s, 3H).

**<sup>13</sup>C NMR** (126 MHz, CDCl<sub>3</sub>) δ 199.1, 138.5, 137.9, 137.3, 137.2, 136.4, 133.1, 130.9, 128.5, 128.4, 128.2, 128.0, 127.4, 127.1, 126.3, 126.1, 125.7, 43.2, 39.4, 38.7, 19.6.

TLC  $R_f$  = 0.57 in hexanes/ethyl acetate 20:1

HRMS (ESI +ve,  $m/z$ ) Calculated for  $C_{25}H_{24}ONa$   $[M+Na]^+$  363.1719; found: 363.1721.

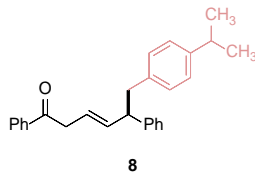

(*E*)-6-(3-isopropylphenyl)-1,5-diphenylhex-3-en-1-one (**8**) (50%, 36.8 mg)

appearance: Light yellow solid

$^1H$  NMR  $\delta$  7.87 – 7.85 (m, 2H), 7.55 – 7.52 (m, 1H), 7.44 – 7.41 (m, 2H), 7.29 – 7.24 (m, 4H), 7.20 – 7.14 (m, 5H), 6.40 – 6.33 (m, 1H), 6.24 – 6.17 (m, 1H), 3.25 (dt,  $J$  = 8.0, 7.2 Hz, 1H), 3.06 (d,  $J$  = 7.0 Hz, 2H), 2.91 – 2.85 (m, 2H), 2.81 – 2.76 (m, 1H), 1.23 (d,  $J$  = 6.9 Hz, 6H).

$^{13}C$  NMR (126 MHz,  $CDCl_3$ )  $\delta$  199.2, 146.7, 137.4, 137.3, 136.8, 132.9, 132.9, 130.0, 129.3, 128.5, 128.4, 128.0, 127.0, 126.3, 126.1, 42.8, 40.9, 40.3, 33.7, 24.0.

HRMS (ESI +ve,  $m/z$ ) calculated for  $C_{27}H_{28}ONa$   $[M+Na]^+$  391.2032; found: 391.2039.

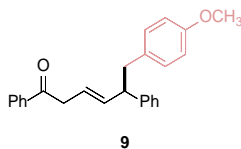

(*E*)-6-(4-methoxyphenyl)-1,5-diphenylhex-3-en-1-one (**9**) (62%, 44.2 mg)

Appearance: Light yellow solid

$^1H$  NMR (500 MHz,  $CDCl_3$ )  $\delta$  7.88 (dd,  $J$  = 8.4, 1.3 Hz, 2H), 7.56 – 7.52 (m, 1H), 7.45 – 7.42 (m, 2H), 7.28 – 7.27 (m, 4H), 7.20 – 7.16 (m, 1H), 7.13 – 7.11 (m, 2H), 6.84 – 6.81 (m, 2H), 6.38 – 6.31 (m, 1H), 6.22 – 6.14 (m, 1H), 3.78 (s, 3H), 3.22 (dt,  $J$  = 8.1, 7.1 Hz, 1H), 3.08 (d,  $J$  = 7.1 Hz, 2H), 2.84 – 2.77 (m, 2H).

$^{13}C$  NMR (126 MHz,  $CDCl_3$ )  $\delta$  199.2, 158.0, 137.4, 137.3, 132.9, 132.8, 131.6, 130.3, 130.1, 128.5, 128.4, 128.0, 127.0, 126.1, 113.7, 55.2, 42.8, 40.5, 40.5.

TLC  $R_f$  = 0.57 in hexane/ethyl acetate 20:1

HRMS (APCI +ve,  $m/z$ ) Calculated for  $C_{25}H_{25}O_2$   $[M+H]^+$  357.1849; found: 357.1846.

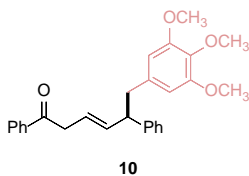

(*E*)-1,5-diphenyl-6-(3,4,5-trimethoxyphenyl)hex-3-en-1-one (**10**) (57%, 47.4 mg)

Appearance: Bright yellow solid

$^1H$  NMR (500 MHz,  $CDCl_3$ )  $\delta$  7.89 (dd,  $J$  = 8.4, 1.4 Hz, 2H), 7.57 – 7.53 (m, 1H), 7.47 – 7.41 (m, 2H), 7.37 – 7.26 (m, 4H), 7.21 – 7.16 (m, 1H), 6.40 (s, 2H), 6.38 – 6.34 (m, 1H), 6.21 (dt,  $J$  = 15.9, 7.1 Hz, 1H), 3.82 (s, 3H), 3.76 (s, 6H), 3.27 (dt,  $J$  = 7.9, 6.9 Hz, 1H), 3.09 (d,  $J$  = 7.1 Hz, 2H), 2.81 – 2.79 (m, 2H).

$^{13}C$  NMR (126 MHz,  $CDCl_3$ )  $\delta$  199.1, 152.9, 137.3, 137.2, 136.3, 135.2, 133.0, 132.7, 130.2, 128.6, 128.5, 128.0, 127.2, 126.0, 106.3, 60.8, 56.0, 42.6, 41.5, 40.1.

TLC  $R_f$  = 0.57 in hexane/ethyl acetate 20:1

HRMS (APCI +ve,  $m/z$ ) Calculated for  $C_{27}H_{29}O_4$   $[M+H]^+$  417.2060; found: 417.2059.

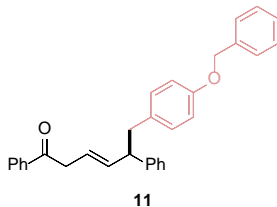

(*E*)-6-(4-(benzyloxy)phenyl)-1,5-diphenylhex-3-en-1-one (**11**) (56%, 48.4 mg)

Appearance: Light yellow solid

**<sup>1</sup>H NMR** (500 MHz, CDCl<sub>3</sub>) δ 7.88 (dd, *J* = 8.4, 1.3 Hz, 2H), 7.64 – 7.49 (m, 3H), 7.45 – 7.40 (m, 5H), 7.36 – 7.27 (m, 4H), 7.20 – 7.17 (m, 1H), 7.14 – 7.10 (m, 2H), 6.91 – 6.87 (m, 2H), 6.40 – 6.31 (m, 2H), 6.23 – 6.14 (m, 2H), 5.04 (s, 2H), 3.22 (dt, *J* = 8.1, 7.0 Hz, 1H), 3.08 (d, *J* = 6.8 Hz, 2H), 2.84 – 2.76 (m, 2H).

**<sup>13</sup>C NMR** (126 MHz, CDCl<sub>3</sub>) δ 199.2, 157.3, 144.8, 141.9, 137.4, 137.3, 137.1, 132.9, 132.8, 131.9, 130.4, 130.2, 128.5, 128.4, 128.0, 127.9, 127.5, 127.0, 126.1, 114.7, 70.0, 42.8, 40.5.

**TLC R<sub>f</sub>** = 0.66 in hexane/ethyl acetate 20:1

**HRMS** (APCI +ve, *m/z*) Calculated for C<sub>31</sub>H<sub>29</sub>O<sub>2</sub> [M+H]<sup>+</sup> 433.2162; found: 433.2156.

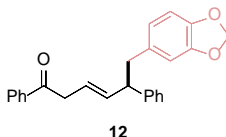

(*E*)-6-(benzo[d][1,3]dioxol-5-yl)-1,5-diphenylhex-3-en-1-one (**12**) (62%, 45.9 mg)

**<sup>1</sup>H NMR** (500 MHz, ) δ 7.89 (dd, *J* = 8.4, 1.3 Hz, 2H), 7.56 – 7.53 (m, 1H), 7.46 – 7.42 (m, 2H), 7.27 (m, 4H), 7.20 – 7.16 (m, 1H), 6.72 – 6.70 (m, 2H), 6.65 (dd, *J* = 7.9, 1.7 Hz, 1H), 6.38 – 6.32 (m, 1H), 6.21 – 6.13 (m, 1H), 5.92 (s, 2H), 3.20 (dt, *J* = 8.1, 7.0 Hz, 1H), 3.07 (d, *J* = 7.4 Hz, 2H), 2.77 (d, *J* = 7.1 Hz, 2H).

**<sup>13</sup>C NMR** (126 MHz, CDCl<sub>3</sub>) δ 199.1, 147.5, 145.9, 137.3, 137.2, 133.4, 132.9, 132.6, 130.2, 128.5, 128.4, 128.0, 127.1, 126.1, 122.3, 109.6, 108.0, 100.8, 42.8, 41.1, 40.5.

**HRMS** (ESI +ve, *m/z*) calculated for C<sub>25</sub>H<sub>22</sub>O<sub>3</sub>Na [M+Na]<sup>+</sup> 393.1461; found: 393.1461.

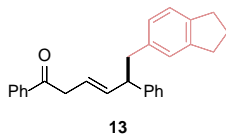

(*E*)-6-(2,3-dihydro-1H-inden-5-yl)-1,5-diphenylhex-3-en-1-one (**13**) (66%, 48.3 mg)

Appearance: Light yellow solid

**<sup>1</sup>H NMR** (500 MHz, CDCl<sub>3</sub>) δ 7.88 – 7.86 (m, 2H), 7.55 – 7.52 (m, 1H), 7.44 – 7.41 (m, 2H), 7.31 – 7.27 (m, 4H), 7.20 – 7.08 (m, 4H), 6.40 – 6.33 (m, 1H), 6.26 – 6.17 (m, 1H), 3.25 (dt, *J* = 7.4, 6.9 Hz, 1H), 3.07 (d, *J* = 7.4, 2H), 2.98 – 2.94 (m, 4H), 2.87 – 2.84 (m, 2H), 2.15 – 2.07 (m, 2H).

**<sup>13</sup>C NMR** (126 MHz, CDCl<sub>3</sub>) δ 199.3, 145.0, 144.4, 142.0, 137.5, 137.3, 137.2, 133.1, 132.9, 128.5, 128.4, 128.0, 127.2, 126.1, 125.4, 124.6, 42.8, 41.2, 40.4, 33.0, 32.5, 25.4.

**TLC R<sub>f</sub>** = 0.45 in hexane/ethyl acetate 20:1

**HRMS** (APCI +ve, *m/z*) Calculated for C<sub>27</sub>H<sub>27</sub>O [M+H]<sup>+</sup> 367.1900; found: 367.1904.

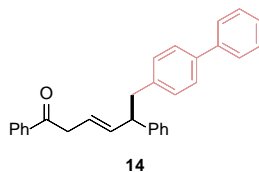

(*E*)-6-([1,1'-biphenyl]-4-yl)-1,5-diphenylhex-3-en-1-one (**14**) (88%, 70.7 mg)

Appearance: Light yellow solid

**<sup>1</sup>H NMR** (500 MHz, CDCl<sub>3</sub>) δ 7.90 – 7.88 (m, 2H), 7.59 – 7.51 (m, 5H), 7.45 – 7.40 (m, 5H), 7.34 – 7.28 (m, 6H), 7.20 – 7.17 (m, 1H), 6.40 – 6.34 (m, 1H), 6.21 (dt, *J* = 15.9, 7.1 Hz, 1H), 3.30 (dt, *J* = 7.2, 6.7 Hz, 1H), 3.12 (d, *J* = 7.1 Hz, 2H), 2.91 – 2.89 (d, *J* = 6.7 Hz, 2H).

**<sup>13</sup>C NMR** (126 MHz, CDCl<sub>3</sub>) δ 199.1, 140.9, 139.1, 138.7, 137.3, 137.2, 133.0, 132.6, 130.3, 129.8, 128.7, 128.5, 128.4, 128.0, 127.1, 127.0, 127.0, 126.1, 42.9, 41.0, 40.2.

**TLC** *R<sub>f</sub>* = 0.47 in hexane/ethyl acetate 20:1

**HRMS** (APCI +ve, *m/z*) Calculated for C<sub>30</sub>H<sub>27</sub>O [M+H]<sup>+</sup> 403.2056; found: 403.2055.

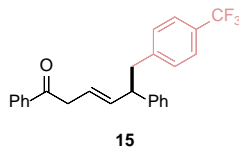

(*E*)-1,5-diphenyl-6-(4-(trifluoromethyl)phenyl)hex-3-en-1-one (**15**) (33%, 26.1 mg)

Appearance: Light yellow solid

**<sup>1</sup>H NMR** (500 MHz, CDCl<sub>3</sub>) δ 7.90 (dd, *J* = 8.4, 1.3 Hz, 2H), 7.60 – 7.39 (m, 6H), 7.35 – 7.32 (m, 2H), 7.29 – 7.27 (m, 3H), 7.22 – 7.18 (m, 1H), 6.31 (dd, *J* = 15.9, 6.6 Hz, 1H), 6.20 – 6.12 (m, 1H), 3.29 (dt, *J* = 7.9, 6.6 Hz, 1H), 3.12 (d, *J* = 6.6 Hz, 2H), 2.98 – 2.85 (m, 2H).

**<sup>13</sup>C NMR** (126 MHz, CDCl<sub>3</sub>) δ 198.7, 143.8, 137.2, 137.1, 133.1, 131.9, 130.7, 129.7, 128.8, 128.6 (q, *J* = 20.5 Hz), 128.5, 128.4, 128.0, 127.3, 126.1 (q, *J* = 238.4 Hz), 125.1 (q, *J* = 3.7 Hz), 42.9, 41.0, 40.1.

**TLC** *R<sub>f</sub>* = 0.70 in hexane/ethyl acetate 20:1

**HRMS** (APCI +ve, *m/z*) Calculated for C<sub>25</sub>H<sub>22</sub>F<sub>3</sub>O [M+H]<sup>+</sup> 395.1617; found: 395.1634.

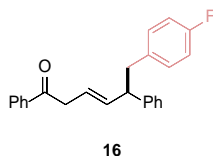

(*E*)-6-(4-fluorophenyl)-1,5-diphenylhex-3-en-1-one (**16**) (69%, 47.3 mg)

Appearance: Light yellow solid

**<sup>1</sup>H NMR** (500 MHz, CDCl<sub>3</sub>) δ 7.90 (dd, *J* = 8.3, 1.4 Hz, 2H), 7.86 – 7.82 (m, 1H), 7.58 – 7.53 (m, 1H), 7.48 – 7.43 (m, 2H), 7.31 – 7.27 (m, 2H), 7.21 – 7.15 (m, 4H), 6.96 – 6.94 (m, 2H), 6.33 – 6.29 (m, 1H), 6.21 – 6.12 (m, 1H), 3.23 (dt, *J* = 8.7, 6.8 Hz, 1H), 3.09 (d, *J* = 6.6 Hz, 2H), 2.88 – 2.79 (m, 2H).

**<sup>13</sup>C NMR** (126 MHz, CDCl<sub>3</sub>) δ 198.9, 161.0 (d, *J* = 246.5 Hz), 139.3, 137.2 (d, *J* = 5.0 Hz), 135.2 (d, *J* = 3.3 Hz), 133.0, 132.3, 130.5, 128.6, 128.4, 128.3, 128.0, 127.2, 126.1, 115.0 (d, *J* = 20.9 Hz), 42.8, 40.5, 40.4.

**TLC** *R<sub>f</sub>* = 0.60 in hexane/ethyl acetate 20:1

**HRMS** (APCI +ve, *m/z*) Calculated for C<sub>24</sub>H<sub>22</sub>FO [M+H]<sup>+</sup> 345.1649; found: 345.1647.

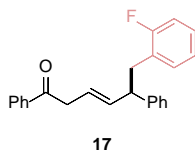

(*E*)-6-(2-fluorophenyl)-1,5-diphenylhex-3-en-1-one (**17**) (87%, 59.8 mg)

Appearance: Light yellow solid

**<sup>1</sup>H NMR** (500 MHz, CDCl<sub>3</sub>) δ 7.91 – 7.89 (m, 2H), 7.56 – 7.53 (m, 1H), 7.46 – 7.43 (m, 2H), 7.25 – 7.12 (m, 4H), 7.07 – 6.98 (m, 2H), 6.37 – 6.30 (m, 1H), 6.21 – 6.14 (m, 1H), 3.30 (dt, *J* = 7.4, 6.4 Hz, 1H), 3.14 (d, *J* = 7.1 Hz, 2H), 2.92 (d, *J* = 6.4 Hz, 2H).

**<sup>13</sup>C NMR** (126 MHz, CDCl<sub>3</sub>) δ 198.9, 161.3 (d, *J* = 252.5 Hz), 139.2, 137.3 (d, *J* = 14.6 Hz), 132.9, 132.3, 131.6 (d, *J* = 4.7 Hz), 130.5, 128.5, 128.4, 128.0 (d, *J* = 8.3 Hz), 127.9, 127.1, 126.5, 126.1, 123.9 (d, *J* = 4.3 Hz), 115.3 (d, *J* = 22.5 Hz), 43.1, 39.7, 34.2.

**TLC** *R<sub>f</sub>* = 0.60 in hexane/ethyl acetate 20:1

**HRMS** (APCI +ve, *m/z*) Calculated for C<sub>24</sub>H<sub>22</sub>FO [M+H]<sup>+</sup> 345.1649; found: 345.1647.



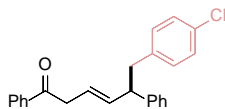

18

(*E*)-6-(4-chlorophenyl)-1,5-diphenylhex-3-en-1-one (**18**) (88%, 63.4 mg)

Appearance: Light yellow solid

**<sup>1</sup>H NMR** (500 MHz, CDCl<sub>3</sub>) δ 7.91 – 7.89 (m, 2H), 7.57 – 7.54 (m, 1H), 7.47 – 7.40 (m, 3H), 7.25 – 7.24 (m, 4H), 7.23 – 7.05 (m, 4H), 6.36 – 6.28 (m, 1H), 6.18 – 6.11 (m, 1H), 3.28 – 3.20 (m, 1H), 3.09 (d, *J* = 6.8 Hz, 2H), 2.88 – 2.77 (m, 2H).

**<sup>13</sup>C NMR** (126 MHz, CDCl<sub>3</sub>) δ 198.9, 138.1, 137.2, 133.1, 132.2, 131.9, 130.6, 129.7, 129.1, 128.6, 128.4, 128.4, 128.0, 127.2, 126.1, 42.8, 40.6, 40.2.

**TLC R<sub>f</sub>** = 0.65 in hexane/ethyl acetate 20:1

**HRMS** (ESI +ve, *m/z*) Calculated for C<sub>25</sub>H<sub>21</sub>ClONa [M+Na]<sup>+</sup> 383.1173; found: 383.1165.

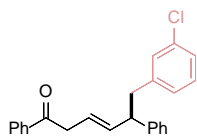

19

(*E*)-6-(3-chlorophenyl)-1,5-diphenylhex-3-en-1-one (**19**) (69%, 49.7 mg)

Appearance: Light yellow solid

**<sup>1</sup>H NMR** (500 MHz, CDCl<sub>3</sub>) δ 7.91 – 7.88 (m, 2H), 7.57 – 7.53 (m, 1H), 7.46 – 7.42 (m, 2H), 7.32 – 7.27 (m, 3H), 7.23 – 7.18 (m, 4H), 7.12 – 7.02 (m, 2H), 6.36 – 6.31 (m, 1H), 6.18 – 6.11 (m, 1H), 3.26 (dt, *J* = 8.2, 6.9 Hz, 1H), 3.09 (d, *J* = 6.7 Hz, 2H), 2.88 – 2.78 (m, 2H).

**<sup>13</sup>C NMR** (126 MHz, CDCl<sub>3</sub>) δ 198.8, 141.7, 137.2, 137.2, 134.1, 133.1, 132.1, 130.6, 129.5, 129.4, 128.6, 128.4, 128.0, 127.6, 127.2, 126.4, 126.1, 42.9, 40.9, 40.1.

**TLC R<sub>f</sub>** = 0.65 in hexane/ethyl acetate 20:1

**HRMS** (ESI +ve, *m/z*) Calculated for C<sub>25</sub>H<sub>21</sub>ClONa [M+Na]<sup>+</sup> 383.1173; found: 383.1179.

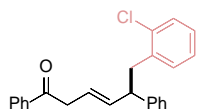

20

(*E*)-6-(2-chlorophenyl)-1,5-diphenylhex-3-en-1-one (**20**) (73%, 52.5 mg)

Appearance: Light yellow solid

**<sup>1</sup>H NMR** (500 MHz, CDCl<sub>3</sub>) δ 7.90 (dd, *J* = 7.7, 2.1 Hz, 2H), 7.56 – 7.53 (m, 1H), 7.46 – 7.43 (m, 2H), 7.34 (dd, *J* = 7.6, 1.7 Hz, 1H), 7.25 – 7.11 (m, 8H), 6.32 – 6.26 (m, 1H), 6.21 – 6.15 (m, 1H), 3.36 (dt, *J* = 7.7, 6.7 Hz, 1H), 3.14 (d, *J* = 6.2 Hz, 2H), 3.05 – 2.96 (m, 2H).

**<sup>13</sup>C NMR** (126 MHz, CDCl<sub>3</sub>) δ 198.9, 137.4, 137.3, 137.2, 134.3, 133.0, 132.2, 131.5, 130.5, 129.5, 128.5, 128.4, 128.1, 127.7, 127.1, 126.6, 126.2, 43.2, 39.5, 38.6.

**TLC R<sub>f</sub>** = 0.65 in hexane/ethyl acetate 20:1

**HRMS** (ESI +ve, *m/z*) Calculated for C<sub>25</sub>H<sub>21</sub>ClONa [M+Na]<sup>+</sup> 383.1173; found: 383.1173.

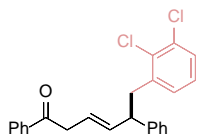

21

(*E*)-6-(2,3-dichlorophenyl)-1,5-diphenylhex-3-en-1-one (**21**) (46%, 36.3 mg)

Appearance: Light yellow solid

**<sup>1</sup>H NMR** (500 MHz, CDCl<sub>3</sub>) δ 7.90 (dd, *J* = 8.4, 1.3 Hz, 2H), 7.57 – 7.54 (m, 1H), 7.46 – 7.43 (m, 2H), 7.32 – 7.30 (m, 1H), 7.26 – 7.24 (m, 4H), 7.20 – 7.07 (m, 3H), 6.32 – 6.26 (m, 1H), 6.20 – 6.13 (m, 1H), 3.36 (dt, *J* = 7.7, 7.1 Hz, 1H), 3.17 – 2.97 (m, 4H).

**<sup>13</sup>C NMR** (126 MHz, CDCl<sub>3</sub>) δ 198.7, 139.9, 137.1, 137.1, 133.2, 133.0, 132.5, 131.8, 130.8, 129.6, 128.6, 128.5, 128.4, 128.1, 127.2, 126.9, 126.2, 43.3, 39.5, 39.3.

**TLC** *R<sub>f</sub>* = 0.65 in hexane/ethyl acetate 20:1

**HRMS** (APCI +ve, *m/z*) Calculated for C<sub>24</sub>H<sub>21</sub>Cl<sub>2</sub>O [M+H]<sup>+</sup> 395.0964; found: 395.0967.

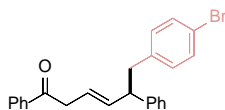

22

(*E*)-6-(4-bromophenyl)-1,5-diphenylhex-3-en-1-one (**22**) (86%, 69.5 mg)

Appearance: Bright yellow solid

**<sup>1</sup>H NMR** (500 MHz, CDCl<sub>3</sub>) δ 7.89 (dd, *J* = 8.3, 1.3 Hz, 2H), 7.58 – 7.54 (m, 1H), 7.47 – 7.43 (m, 2H), 7.40 – 7.37 (m, 2H), 7.28 – 7.26 (m, 3H), 7.25 – 7.18 (m, 2H), 7.10 – 7.07 (m, 2H), 6.35 – 6.29 (m, 1H), 6.18 – 6.11 (m, 1H), 3.24 (dt, *J* = 8.2, 7.0 Hz, 1H), 3.09 (m, *J* = 6.7 Hz, 2H), 2.89 – 2.75 (m, 2H).

**<sup>13</sup>C NMR** (126 MHz, CDCl<sub>3</sub>) δ 198.8, 138.6, 137.2, 133.1, 132.1, 131.3, 131.1, 130.6, 128.6, 128.5, 128.0, 127.2, 126.1, 125.5, 120.0, 42.8, 40.7, 40.1.

**TLC** *R<sub>f</sub>* = 0.70 in hexane/ethyl acetate 20:1

**HRMS** (APCI +ve, *m/z*) Calculated for C<sub>24</sub>H<sub>22</sub>BrO [M+H]<sup>+</sup> 405.0848; found: 405.0848.

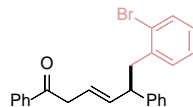

23

(*E*)-6-(2-bromophenyl)-1,5-diphenylhex-3-en-1-one (**23**) (93%, 74.9 mg)

Appearance: Light yellow solid

**<sup>1</sup>H NMR** (500 MHz, CDCl<sub>3</sub>) δ 7.90 (dd, *J* = 8.4, 1.3 Hz, 2H), 7.56 – 7.48 (m, 3H), 7.46 – 7.42 (m, 2H), 7.25 – 7.15 (m, 6H), 7.07 – 7.03 (m, 1H), 6.34 – 6.26 (m, 1H), 6.21 – 6.16 (m, 1H), 3.37 (dt, *J* = 7.3, 6.6 Hz, 1H), 3.15 (d, *J* = 6.3 Hz, 2H), 3.06 – 2.96 (m, 2H).

**<sup>13</sup>C NMR** (126 MHz, CDCl<sub>3</sub>) δ 198.9, 139.2, 137.3, 137.1, 132.9, 132.9, 132.1, 131.6, 130.5, 128.5, 128.4, 128.1, 127.9, 127.2, 127.1, 126.2, 120.3, 43.2, 41.1, 39.6.

**TLC** *R<sub>f</sub>* = 0.70 in hexane/ethyl acetate 20:1

**HRMS** (ESI +ve, *m/z*) Calculated for C<sub>24</sub>H<sub>21</sub>BrONa [M+Na]<sup>+</sup> 427.0668; found: 427.0652.

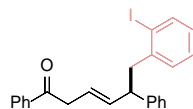

24

(*E*)-6-(2-iodophenyl)-1,5-diphenylhex-3-en-1-one (**24**) (78%, 70.5 mg)

Appearance: Light yellow solid

**<sup>1</sup>H NMR** (500 MHz, CDCl<sub>3</sub>) δ 7.90 (dd, *J* = 8.3, 1.3 Hz, 2H), 7.82 – 7.80 (m, 1H), 7.56 – 7.53 (m, 1H), 7.46 – 7.43 (m, 2H), 7.26 – 7.22 (m, 6H), 7.19 – 7.16 (m, 1H), 6.89 – 6.86 (m, 1H), 6.27 – 6.15 (m, 2H), 3.33 (dt, *J* = 7.8, 6.8 Hz, 1H), 3.16 (d, *J* = 7.4 Hz, 2H), 3.05 – 2.95 (m, 2H).

**<sup>13</sup>C NMR** (126 MHz, CDCl<sub>3</sub>) δ 198.9, 142.4, 139.6, 137.2, 137.1, 133.0, 131.9, 130.7, 130.6, 128.8, 128.6, 128.4, 128.1, 128.1, 127.1, 126.2, 101.4, 45.6, 43.2, 39.9.

TLC  $R_f$  = 0.70 in hexane/ethyl acetate 20:1

HRMS (APCI +ve,  $m/z$ ) Calculated for  $C_{24}H_{22}IO$   $[M+H]^+$  453.0710; found: 453.0713.

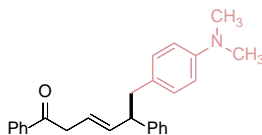

25

(*E*)-6-(4-(dimethylamino)phenyl)-1,5-diphenylhex-3-en-1-one (**25**) (70%, 51.7 mg)

Appearance: Light yellow solid

$^1H$  NMR (500 MHz,  $CDCl_3$ )  $\delta$  7.87 (dd,  $J$  = 8.4, 1.4 Hz, 2H), 7.54 – 7.51 (m, 1H), 7.44 – 7.41 (m, 2H), 7.31 – 7.27 (m, 3H), 7.26 – 7.25 (m, 1H), 7.19 – 7.16 (m, 1H), 7.10 – 7.07 (m, 2H), 6.70 – 6.68 (m, 2H), 6.39 – 6.33 (m, 1H), 6.25 – 6.17 (m, 1H), 3.21 (dt,  $J$  = 8.4, 6.4 Hz, 1H), 3.08 (d,  $J$  = 7.8 Hz, 2H), 2.91 (s, 6H), 2.84 – 2.71 (m, 2H).

$^{13}C$  NMR (126 MHz,  $CDCl_3$ )  $\delta$  199.4, 148.8, 140.6, 137.5, 137.3, 133.2, 132.8, 130.0, 129.9, 128.5, 128.4, 128.1, 126.9, 126.1, 112.8, 42.8, 40.8, 40.5, 40.4.

TLC  $R_f$  = 0.59 in hexane/ethyl acetate 20:1

HRMS (APCI +ve,  $m/z$ ) Calculated for  $C_{26}H_{28}NO$   $[M+H]^+$  370.1093; found: 370.1091.

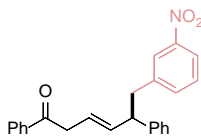

26

(*E*)-6-(3-nitrophenyl)-1,5-diphenylhex-3-en-1-one (**26**) (40%, 29.6 mg)

Appearance: Light yellow solid

$^1H$  NMR (500 MHz,  $CDCl_3$ )  $\delta$  8.10 – 8.04 (m, 2H), 7.92 (dd,  $J$  = 8.4, 1.3 Hz, 2H), 7.59 – 7.54 (m, 2H), 7.48 – 7.42 (m, 3H), 7.25 – 7.23 (m, 4H), 7.21 – 7.16 (m, 1H), 6.35 – 6.25 (m, 1H), 6.17 – 6.09 (m, 1H), 3.33 (dt,  $J$  = 7.5, 6.2 Hz, 1H), 3.16 (d,  $J$  = 6.9 Hz, 2H), 3.11 – 2.86 (m, 2H).

$^{13}C$  NMR (126 MHz,  $CDCl_3$ )  $\delta$  198.5, 148.2, 141.8, 137.0, 136.9, 135.6, 133.2, 131.4, 131.3, 129.1, 128.7, 128.5, 128.0, 127.4, 126.1, 124.1, 121.4, 43.1, 40.8, 40.2.

TLC  $R_f$  = 0.45 in hexane/ethyl acetate 20:1

HRMS (ESI +ve,  $m/z$ ) Calculated for  $C_{24}H_{21}NO_3Na$   $[M+Na]^+$  394.1414; found: 394.1409.

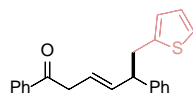

27

(*E*)-1,5-diphenyl-6-(thiophen-2-yl)hex-3-en-1-one (**27**) (31%, 20.6 mg)

Appearance: Light yellow solid

$^1H$  NMR (500 MHz,  $CDCl_3$ )  $\delta$  7.90 (dd,  $J$  = 8.4, 1.4 Hz, 2H), 7.56 – 7.53 (m, 1H), 7.50 – 7.42 (m, 2H), 7.31 – 7.28 (m, 4H), 7.21 – 7.17 (m, 1H), 7.14 – 7.10 (m, 3H), 6.48 – 6.39 (m, 1H), 6.27 – 6.18 (m, 1H), 3.29 (dt,  $J$  = 8.1, 6.1 Hz, 1H), 3.15 – 3.09 (m, 4H).

$^{13}C$  NMR (126 MHz,  $CDCl_3$ )  $\delta$  198.8, 141.8, 137.2, 133.0, 132.4, 130.8, 130.0, 128.6, 128.4, 128.0, 127.8, 127.2, 126.7, 126.2, 123.8, 42.7, 40.3, 35.2.

TLC  $R_f$  = 0.65 in hexane/ethyl acetate 20:1

HRMS (APCI +ve,  $m/z$ ) Calculated for  $C_{22}H_{21}OS$   $[M+H]^+$  333.1307; found: 333.1305.

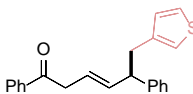

28

(*E*)-1,5-diphenyl-6-(thiophen-3-yl)hex-3-en-1-one (**28**) (27%, 17.9 mg)

Appearance: Light yellow solid

**<sup>1</sup>H NMR** (500 MHz, CDCl<sub>3</sub>) δ 7.89 (dd, *J* = 8.3, 1.3 Hz, 2H), 7.56 – 7.53 (m, 1H), 7.46 – 7.42 (m, 2H), 7.30 – 7.28 (m, 3H), 7.25 – 7.24 (m, 2H), 7.20 – 7.17 (m, 1H), 6.99 – 6.97 (m, 2H), 6.42 – 6.34 (m, 1H), 6.22 – 6.15 (m, 1H), 3.29 (dt, *J* = 7.1, 6.2 Hz, 1H), 3.09 (d, *J* = 7.4 Hz, 2H), 2.90 (d, *J* = 6.9 Hz, 2H).

**<sup>13</sup>C NMR** (126 MHz, CDCl<sub>3</sub>) δ 199.0, 139.8, 137.3, 137.2, 133.0, 132.7, 130.3, 128.8, 128.6, 128.4, 128.0, 127.1, 126.1, 125.3, 121.7, 42.9, 39.6, 35.6.

**TLC R<sub>f</sub>** = 0.65 in hexane/ethyl acetate 20:1

**HRMS** (APCI +ve, *m/z*) Calculated for C<sub>22</sub>H<sub>21</sub>OS [M+H]<sup>+</sup> 333.1307; found: 333.1303.

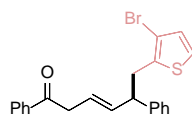

29

(*E*)-6-(3-bromothiophen-2-yl)-1,5-diphenylhex-3-en-1-one (**29**) (33%, 27.0 mg)

Appearance: Light yellow solid

**<sup>1</sup>H NMR** (500 MHz, CDCl<sub>3</sub>) δ 7.93 – 7.91 (m, 2H), 7.57 – 7.54 (m, 1H), 7.47 – 7.43 (m, 2H), 7.31 – 7.26 (m, 3H), 7.21 – 7.17 (m, 1H), 7.15 – 7.12 (m, 1H), 7.11 – 7.08 (m, 1H), 6.90 – 6.89 (m, 1H), 6.45 – 6.37 (m, 1H), 6.22 – 6.16 (m, 1H), 3.36 (dt, *J* = 7.4, 6.8 Hz, 1H), 3.18 (d, *J* = 7.4 Hz, 2H), 3.11 – 3.05 (m, 2H).

**<sup>13</sup>C NMR** (126 MHz, CDCl<sub>3</sub>) δ 198.5, 137.2, 137.1, 136.6, 133.0, 131.6, 131.1, 129.8, 128.6, 128.4, 128.1, 127.2, 126.2, 124.0, 110.1, 42.9, 40.0, 34.2.

**TLC R<sub>f</sub>** = 0.68 in hexane/ethyl acetate 20:1

**HRMS** (APCI +ve, *m/z*) Calculated for C<sub>22</sub>H<sub>20</sub>BrOS [M+H]<sup>+</sup> 411.1304; found: 411.1300.

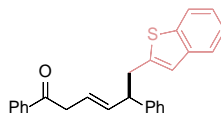

30

(*E*)-6-(benzo[b]thiophen-2-yl)-1,5-diphenylhex-3-en-1-one (**30**) (67%, 51.2 mg)

Appearance: Light yellow solid

**<sup>1</sup>H NMR** (500 MHz, CDCl<sub>3</sub>) δ 7.93 – 7.91 (m, 2H), 7.78 – 7.76 (m, 1H), 7.67 – 7.65 (m, 1H), 7.57 – 7.53 (m, 1H), 7.46 – 7.40 (m, 2H), 7.33 – 7.28 (m, 7H), 7.22 – 7.19 (m, 1H), 6.51 – 6.46 (m, 1H), 6.31 – 6.22 (m, 1H), 3.42 (dt, *J* = 8.0, 6.8 Hz, 1H), 3.20 – 3.13 (m, 4H).

**<sup>13</sup>C NMR** (126 MHz, CDCl<sub>3</sub>) δ 198.7, 143.1, 140.0, 139.7, 137.2, 137.1, 133.0, 132.0, 130.9, 128.6, 128.5, 128.1, 127.3, 126.2, 124.1, 123.6, 122.9, 122.4, 122.1, 42.7, 39.8, 36.1.

**TLC R<sub>f</sub>** = 0.66 in hexane/ethyl acetate 20:1

**HRMS** (APCI +ve, *m/z*) Calculated for C<sub>26</sub>H<sub>23</sub>OS [M+H]<sup>+</sup> 383.1307; found: 383.1301.

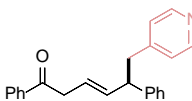

31

(*E*)-1,5-diphenyl-6-(pyridin-4-yl)hex-3-en-1-one (**31**) (86%, 56.2 mg)

Appearance: Light yellow solid

**<sup>1</sup>H NMR** (500 MHz, CDCl<sub>3</sub>) δ 8.51 – 8.50 (m, 2H), 7.93 – 7.91 (m, 2H), 7.60 – 7.56 (m, 1H), 7.50 – 7.45 (m, 2H), 7.41 – 7.27 (m, 2H), 7.25 – 7.18 (m, 5H), 6.35 – 6.28 (m, 1H), 6.16 – 6.08 (m, 1H), 3.32 – 3.28 (m, 1H), 3.16 (d, *J* = 7.5 Hz, 2H), 3.00 – 2.78 (m, 2H).

**<sup>13</sup>C NMR** (126 MHz, CDCl<sub>3</sub>) δ 198.4, 150.0, 148.2, 137.0, 136.7, 133.3, 131.3, 131.1, 128.7, 128.5, 128.0, 127.5, 126.1, 125.2, 43.0, 40.6, 39.5.

TLC  $R_f$  = 0.59 in hexane/ethyl acetate 20:1

HRMS (APCI +ve,  $m/z$ ) Calculated for  $C_{23}H_{22}NO$   $[M+H]^+$  328.1823; found: 328.1803.

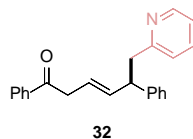

(*E*)-1,5-diphenyl-6-(pyridin-2-yl)hex-3-en-1-one (**32**) (76%, 49.7 mg)

Appearance: Light yellow solid

$^1H$  NMR (500 MHz,  $CDCl_3$ )  $\delta$  8.54 – 8.52 (m, 1H), 7.92 – 7.90 (m, 2H), 7.61 – 7.58 (m, 1H), 7.55 – 7.52 (m, 1H), 7.45 – 7.42 (m, 2H), 7.25 – 7.21 (m, 5H), 7.18 – 7.15 (m, 1H), 7.13 – 7.10 (m, 1H), 6.36 – 6.31 (m, 1H), 6.25 – 6.18 (m, 1H), 3.49 (dt,  $J$  = 8.6, 7.0 Hz, 1H), 3.24 – 3.07 (m, 4H).

$^{13}C$  NMR (126 MHz,  $CDCl_3$ )  $\delta$  198.9, 159.7, 149.0, 137.3, 137.2, 136.5, 132.9, 132.3, 130.5, 128.5, 128.4, 128.1, 127.1, 126.1, 123.9, 121.4, 43.3, 43.3, 39.4.

TLC  $R_f$  = 0.59 in hexane/ethyl acetate 20:1

HRMS (APCI +ve,  $m/z$ ) Calculated for  $C_{23}H_{22}NO$   $[M+H]^+$  328.1823; found: 328.1803.

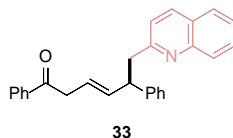

(*E*)-1,5-diphenyl-6-(quinolin-2-yl)hex-3-en-1-one (**33**) (45%, 33.9 mg)

Appearance: Light yellow solid

$^1H$  NMR (500 MHz,  $CDCl_3$ )  $\delta$  8.08 – 7.98 (m, 2H), 7.92 – 7.90 (m, 2H), 7.78 – 7.76 (m, 1H), 7.69 – 7.66 (m, 1H), 7.54 – 7.36 (m, 6H), 7.24 – 7.22 (m, 3H), 7.19 – 7.14 (m, 1H), 6.44 – 6.36 (m, 1H), 6.30 – 6.25 (m, 1H), 3.65 (dt,  $J$  = 8.9, 7.1 Hz, 1H), 3.31 – 3.13 (m, 4H).

$^{13}C$  NMR (126 MHz,  $CDCl_3$ )  $\delta$  199.0, 160.4, 147.8, 137.2, 137.2, 136.3, 132.9, 132.4, 130.4, 129.4, 128.8, 128.5, 128.4, 128.1, 127.5, 127.1, 126.8, 126.2, 125.9, 122.1, 44.2, 43.3, 39.1.

TLC  $R_f$  = 0.59 in hexane/ethyl acetate 20:1

HRMS (ESI +ve,  $m/z$ ) Calculated for  $C_{27}H_{23}NONa$   $[M+Na]^+$  400.1672; found: 400.1675.

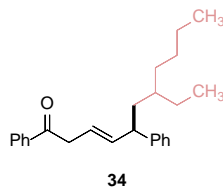

(*E*)-7-ethyl-1,5-diphenylundec-3-en-1-one (**34**) (27%, 18.8 mg)

Appearance: Light yellow solid

$^1H$  NMR (500 MHz,  $CDCl_3$ )  $\delta$  7.98 (dd,  $J$  = 8.3, 1.4 Hz, 2H), 7.70 – 7.65 (m, 3H), 7.48 – 7.43 (m, 4H), 7.32 – 7.28 (s, 1H), 6.19 – 6.14 (m, 1H), 6.05 – 6.02 (dt,  $J$  = 16.0, 6.0 Hz, 1H), 3.14 (d,  $J$  = 7.8 Hz, 2H), 2.81 – 2.76 (m, 1H), 1.29 – 1.25 (m, 11H), 0.89 – 0.86 (m, 6H).

$^{13}C$  NMR (126 MHz,  $CDCl_3$ )  $\delta$  200.1, 139.7, 136.6, 133.6, 132.1, 128.7, 128.5, 128.4, 128.1, 127.7, 126.5, 45.2, 44.4, 39.2, 36.0, 33.1, 31.7, 29.3, 22.4, 14.0, 10.9.

TLC  $R_f$  = 0.30 in hexane/ethyl acetate 20:1

HRMS (APCI +ve,  $m/z$ ) Calculated for  $C_{25}H_{33}O$   $[M+H]^+$  349.2212; found: 349.2218.

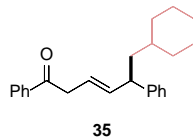

(*E*)-6-cyclohexyl-1,5-diphenylhex-3-en-1-one (**35**) (34%, 22.6 mg)

Appearance: Light yellow solid

**<sup>1</sup>H NMR** (500 MHz, CDCl<sub>3</sub>) δ 7.99 – 7.97 (m, 2H), 7.76 – 7.64 (m, 3H), 7.49 – 7.43 (m, 4H), 7.34 – 7.30 (m, 1H), 6.25 – 6.17 (m, 1H), 5.96 – 5.91 (m, 1H), 3.20 (d, *J* = 7.5 Hz, 2H), 2.73 – 2.62 (m, 1H), 1.51 – 1.45 (m, 2H), 1.31 – 1.16 (m, 11H).

**<sup>13</sup>C NMR** (126 MHz, CDCl<sub>3</sub>) δ 200.1, 140.3, 136.6, 133.7, 132.1, 128.7, 128.6, 128.4, 128.1, 127.7, 126.5, 45.2, 42.7, 38.1, 33.4, 25.7, 25.3, 25.0.

**TLC** *R<sub>f</sub>* = 0.32 in hexane/ethyl acetate 20:1

**HRMS** (APCI +ve, *m/z*) Calculated for C<sub>24</sub>H<sub>29</sub>O [M+H]<sup>+</sup> 333.2056; found: 333.2060.

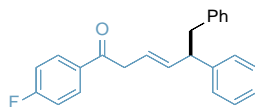

36

(*E*)-1-(4-fluorophenyl)-5,6-diphenylhex-3-en-1-one (**36**) (49%, 33.7 mg)

Appearance: Light yellow solid

**<sup>1</sup>H NMR** (500 MHz, CDCl<sub>3</sub>) δ 7.90 – 7.87 (m, 2H), 7.52 – 7.46 (m, 2H), 7.30 – 7.27 (m, 4H), 7.21 – 7.17 (m, 4H), 7.12 – 7.07 (m, 2H), 6.37 – 6.31 (m, 1H), 6.19 – 6.13 (m, 1H), 3.26 (d, *J* = 7.7, 6.3 Hz, 1H), 3.05 (d, *J* = 7.4 Hz, 2H), 2.90 – 2.81 (m, 2H).

**<sup>13</sup>C NMR** (126 MHz, CDCl<sub>3</sub>) δ 197.4, 165.7 (d, *J* = 250.9 Hz), 139.5, 137.3, 134.1, 132.5, 130.7 (d, *J* = 9.3 Hz), 130.3, 128.8, 128.5, 128.4, 128.3, 126.3, 126.2, 115.5 (d, *J* = 22.5 Hz), 42.7, 41.3, 40.3.

**TLC** *R<sub>f</sub>* = 0.60 in hexane/ethyl acetate 20:1

**HRMS** (APCI +ve, *m/z*) Calculated for C<sub>24</sub>H<sub>22</sub>FO [M+H]<sup>+</sup> 345.1649; found: 345.1647.

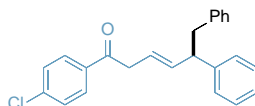

37

(*E*)-1-(4-chlorophenyl)-5,6-diphenylhex-3-en-1-one (**37**) (46%, 33.1 mg)

Appearance: Light yellow solid

**<sup>1</sup>H NMR** (500 MHz, CDCl<sub>3</sub>) δ 7.81 – 7.79 (m, 2H), 7.48 – 7.44 (m, 2H), 7.41 – 7.39 (m, 2H), 7.30 – 7.27 (m, 4H), 7.22 – 7.17 (m, 4H), 6.37 – 6.31 (m, 1H), 6.21 – 6.13 (m, 1H), 3.25 (dt, *J* = 7.3, 6.7 Hz, 1H), 3.03 (d, *J* = 7.5 Hz, 2H), 2.90 – 2.80 (m, 2H).

**<sup>13</sup>C NMR** (126 MHz, CDCl<sub>3</sub>) δ 197.8, 139.4, 137.2, 135.5, 134.1, 132.4, 129.5, 129.4, 128.8, 128.5, 128.4, 128.3, 127.2, 126.2, 126.1, 42.8, 41.3, 40.4.

**TLC** *R<sub>f</sub>* = 0.65 in hexane/ethyl acetate 20:1

**HRMS** (ESI +ve, *m/z*) Calculated for C<sub>24</sub>H<sub>21</sub>ClONa [M+Na]<sup>+</sup> 383.1173; found: 383.1179.

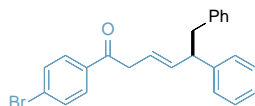

38

(*E*)-1-(4-bromophenyl)-5,6-diphenylhex-3-en-1-one (**38**) (46%, 37.2 mg)

Appearance: Light yellow solid

**<sup>1</sup>H NMR** (500 MHz, CDCl<sub>3</sub>) δ 7.89 (dd, *J* = 7.4, 2.0 Hz, 2H), 7.76 – 7.73 (m, 2H), 7.60 – 7.58 (m, 2H), 7.52 – 7.47 (m, 2H), 7.32 – 7.29 (m, 2H), 7.24 – 7.19 (m, 4H), 6.39 – 6.33 (m, 1H), 6.23 – 6.15 (m, 1H), 3.26 (dt, *J* = 8.2, 6.5 Hz, 1H), 3.05 (d, *J* = 7.8 Hz, 2H), 2.92 – 2.83 (m, 2H).

**<sup>13</sup>C NMR** (126 MHz, CDCl<sub>3</sub>) δ 198.0, 139.4, 135.9, 132.4, 131.8, 130.4, 129.6, 129.4, 128.8, 128.5, 128.4, 128.3, 127.2, 126.3, 126.1, 42.8, 41.3, 40.4.

**TLC** *R<sub>f</sub>* = 0.70 in hexane/ethyl acetate 20:1

**HRMS** (APCI +ve, *m/z*) Calculated for C<sub>24</sub>H<sub>22</sub>BrO [M+H]<sup>+</sup> 405.0848; found: 405.0848.

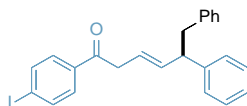

39

(*E*)-1-(4-iodophenyl)-5,6-diphenylhex-3-en-1-one (**39**) (46%, 41.6 mg)

Appearance: Light yellow solid

<sup>1</sup>H NMR (500 MHz, CDCl<sub>3</sub>) δ 7.82 – 7.78 (m, 2H), 7.57 – 7.55 (m, 2H), 7.48 – 7.44 (m, 6H), 7.30 – 7.27 (m, 2H), 7.21 – 7.18 (m, 2H), 6.36 – 6.29 (m, 1H), 6.18 – 6.12 (m, 1H), 3.23 (dt, *J* = 8.1, 7.1 Hz, 1H), 3.03 (d, *J* = 7.6 Hz, 2H), 2.89 – 2.80 (m, 2H).

<sup>13</sup>C NMR (126 MHz, CDCl<sub>3</sub>) δ 198.4, 139.4, 137.8, 136.4, 134.1, 132.4, 131.2, 130.4, 128.8, 128.5, 128.4, 128.3, 127.2, 126.1, 100.9, 42.7, 41.3, 40.4.

TLC R<sub>f</sub> = 0.70 in hexane/ethyl acetate 20:1

HRMS (ESI +ve, *m/z*) Calculated for C<sub>24</sub>H<sub>21</sub>I ONa [M+Na]<sup>+</sup> 475.0529; found: 475.0525.

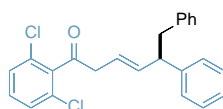

40

(*E*)-1-(2,6-dichlorophenyl)-5,6-diphenylhex-3-en-1-one (**40**) (71%, 56.0 mg)

Appearance: Light yellow solid

<sup>1</sup>H NMR (500 MHz, CDCl<sub>3</sub>) δ 7.31 – 7.28 (m, 1H), 7.27 – 7.20 (m, 12H), 6.34 (dd, *J* = 15.9, 8.0 Hz, 1H), 6.15 (dt, *J* = 15.9, 7.1 Hz, 1H), 3.33 – 3.25 (m, 1H), 3.01 (d, *J* = 7.0 Hz, 2H), 2.98 – 2.80 (m, 2H).

<sup>13</sup>C NMR (126 MHz, CDCl<sub>3</sub>) δ 200.7, 139.6, 139.5, 137.4, 132.2, 130.5, 130.5, 130.4, 129.4, 128.4, 128.3, 128.1, 127.1, 126.2, 126.1, 48.0, 41.1, 38.9.

TLC R<sub>f</sub> = 0.65 in hexane/ethyl acetate 20:1

HRMS (APCI +ve, *m/z*) Calculated for C<sub>24</sub>H<sub>21</sub>Cl<sub>2</sub>O [M+H]<sup>+</sup> 395.0964; found: 395.0967.

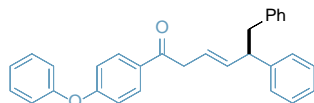

41

(*E*)-1-(4-phenoxyphenyl)-5,6-diphenylhex-3-en-1-one (**41**) (48%, 40.1 mg)

Appearance: Light yellow solid

<sup>1</sup>H NMR (500 MHz, CDCl<sub>3</sub>) δ 7.88 – 7.85 (m, 2H), 7.41 – 7.37 (m, 2H), 7.29 – 7.27 (m, 5H), 7.22 – 7.16 (m, 6H), 7.07 – 7.04 (m, 2H), 6.98 – 6.95 (m, 2H), 6.37 – 6.31 (m, 1H), 6.17 (dt, *J* = 15.9, 6.9 Hz, 1H), 3.26 (dt, *J* = 8.3, 7.2 Hz, 1H), 3.03 (d, *J* = 6.9 Hz, 2H), 2.86 (d, *J* = 7.2 Hz, 2H).

<sup>13</sup>C NMR (126 MHz, CDCl<sub>3</sub>) δ 197.6, 161.8, 155.5, 139.6, 137.4, 132.7, 131.9, 130.3, 130.2, 130.0, 129.4, 128.4, 128.3, 127.1, 126.2, 126.1, 124.5, 120.1, 117.3, 42.6, 41.4, 40.4.

TLC R<sub>f</sub> = 0.66 in hexane/ethyl acetate 20:1

HRMS (APCI +ve, *m/z*) Calculated for C<sub>30</sub>H<sub>27</sub>O<sub>2</sub> [M+H]<sup>+</sup> 419.2005; found: 419.2003.

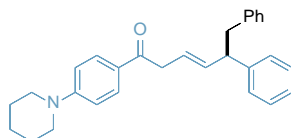

42

(*E*)-5,6-diphenyl-1-(4-(piperidin-1-yl)phenyl)hex-3-en-1-one (**42**) (52%, 42.5 mg)

Appearance: Light yellow solid

**<sup>1</sup>H NMR** (500 MHz, CDCl<sub>3</sub>) δ 7.81 – 7.79 (m, 2H), 7.28 – 7.27 (m, 1H), 7.25 – 7.13 (m, 9H), 6.84 – 6.81 (m, 2H), 6.34 – 6.29 (m, 1H), 6.20 – 6.15 (m, 1H), 3.37 – 3.33 (m, 4H), 3.25 (dt, *J* = 7.3, 6.2 Hz, 1H), 2.98 (d, *J* = 7.5 Hz, 2H), 2.88 – 2.80 (m, 2H), 1.67 – 1.64 (m, 6H).

**<sup>13</sup>C NMR** (126 MHz, CDCl<sub>3</sub>) δ 197.1, 154.3, 139.8, 137.6, 133.2, 130.2, 129.8, 129.5, 128.3, 128.2, 126.9, 126.6, 126.1, 126.0, 113.2, 48.6, 42.2, 41.4, 40.6, 25.3, 24.3.

**TLC** *R<sub>f</sub>* = 0.60 in hexane/ethyl acetate 20:1

**HRMS** (APCI +ve, *m/z*) Calculated for C<sub>29</sub>H<sub>32</sub>NO [M+H]<sup>+</sup> 410.2478; found: 410.2477.

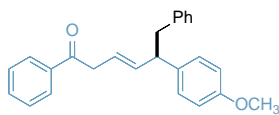

43

(*E*)-5-(4-methoxyphenyl)-1,6-diphenylhex-3-en-1-one (**43**) (78%, 55.5 mg)

Appearance: Light yellow solid

**<sup>1</sup>H NMR** (500 MHz, CDCl<sub>3</sub>) δ 7.87 (dd, *J* = 8.4, 1.4 Hz, 2H), 7.55 – 7.49 (m, 2H), 7.45 – 7.40 (m, 2H), 7.30 – 7.27 (m, 2H), 7.22 – 7.19 (m, 4H), 6.83 – 6.79 (m, 2H), 6.26 (dd, *J* = 15.9, 8.0 Hz, 1H), 6.02 (dt, *J* = 15.9, 7.1 Hz, 1H), 3.78 (s, 3H), 3.24 (dt, *J* = 8.0, 7.0 Hz, 1H), 3.06 (d, *J* = 7.1 Hz, 2H), 2.85 – 2.83 (m, 2H).

**<sup>13</sup>C NMR** (126 MHz, CDCl<sub>3</sub>) δ 199.2, 158.8, 139.7, 137.3, 132.9, 130.5, 130.2, 129.5, 129.4, 128.5, 128.3, 128.0, 127.2, 126.1, 113.8, 55.2, 43.0, 41.5, 40.3.

**TLC** *R<sub>f</sub>* = 0.60 in hexane/ethyl acetate 20:1

**HRMS** (APCI +ve, *m/z*) Calculated for C<sub>25</sub>H<sub>25</sub>O<sub>2</sub> [M+H]<sup>+</sup> 357.1852; found: 357.1849.

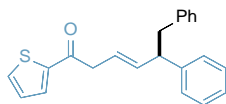

44

(*E*)-5,6-diphenyl-1-(thiophen-2-yl)hex-3-en-1-one (**44**) (42%, 27.9 mg)

Appearance: Light yellow solid

**<sup>1</sup>H NMR** (500 MHz, CDCl<sub>3</sub>) δ 7.63 – 7.60 (m, 2H), 7.29 – 7.27 (m, 6H), 7.22 – 7.17 (m, 4H), 7.11 – 7.09 (m, 1H), 6.35 (dd, *J* = 15.9, 8.0 Hz, 1H), 6.16 (dt, *J* = 15.9, 7.1 Hz, 1H), 3.30 – 3.22 (m, 1H), 3.01 (d, *J* = 7.1 Hz, 2H), 2.86 (d, *J* = 7.2 Hz, 2H).

**<sup>13</sup>C NMR** (126 MHz, CDCl<sub>3</sub>) δ 191.9, 144.7, 139.4, 137.3, 133.6, 132.4, 131.8, 130.4, 129.4, 128.4, 128.3, 128.0, 127.1, 126.2, 126.1, 43.7, 41.3, 40.7.

**TLC** *R<sub>f</sub>* = 0.60 in hexane/ethyl acetate 20:1

**HRMS** (APCI +ve, *m/z*) Calculated for C<sub>22</sub>H<sub>21</sub>OS [M+H]<sup>+</sup> 333.1307; found: 333.13059.

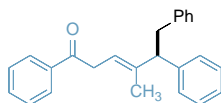

45

(*E*)-4-methyl-1,5,6-triphenylhex-3-en-1-one (**45**) (74%, 50.3 mg)

Appearance: Light yellow solid

**<sup>1</sup>H NMR** (500 MHz, CDCl<sub>3</sub>) δ 7.89 (dd, *J* = 8.4, 1.3 Hz, 2H), 7.56 – 7.53 (m, 1H), 7.47 – 7.43 (m, 2H), 7.30 – 7.27 (m, 2H), 7.26 – 7.13 (m, 6H), 7.06 – 7.03 (m, 2H), 6.12 (t, *J* = 6.8 Hz, 1H), 3.22 – 3.08 (m, 3H), 2.88 (d, *J* = 6.9 Hz, 2H), 1.86 (s, 3H).

**<sup>13</sup>C NMR** (126 MHz, CDCl<sub>3</sub>) δ 199.4, 140.0, 139.0, 138.0, 137.3, 132.9, 129.2, 128.8, 128.5, 128.2, 128.0, 127.9, 126.9, 126.1, 126.0, 47.0, 42.1, 40.1, 15.3.

**TLC** *R<sub>f</sub>* = 0.60 in hexane/ethyl acetate 20:1

**HRMS** (ESI +ve, *m/z*) Calculated for C<sub>25</sub>H<sub>24</sub>ONa [M+Na]<sup>+</sup> 363.1719; found: 363.1709.



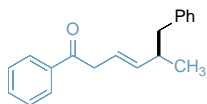

46

(*E*)-5-methyl-1,6-diphenylhex-3-en-1-one (**46**) (63%, 33.1 mg)

Appearance: Light yellow solid

**<sup>1</sup>H NMR** (500 MHz, CDCl<sub>3</sub>) δ 7.89 – 7.87 (m, 2H), 7.59 – 7.55 (m, 1H), 7.48 – 7.45 (m, 2H), 7.33 – 7.31 (m, 2H), 7.24 – 7.21 (m, 3H), 5.65 – 5.56 (m, 2H), 3.28 (d, *J* = 7.8 Hz, 2H), 3.10 – 3.03 (m, 1H), 2.78 – 2.75 (m, 2H), 1.60 (d, *J* = 5.0 Hz, 3H).

**<sup>13</sup>C NMR** (126 MHz, CDCl<sub>3</sub>) δ 199.6, 140.0, 137.4, 133.5, 132.8, 129.4, 128.5, 128.2, 128.1, 126.0, 125.5, 43.1, 41.6, 40.1, 17.9.

**TLC** *R<sub>f</sub>* = 0.50 in hexane/ethyl acetate 20:1

**HRMS** (ESI +ve, *m/z*) Calculated for C<sub>19</sub>H<sub>20</sub>ONa [M+Na]<sup>+</sup> 287.1406; found: 287.1407.

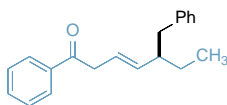

47

(*E*)-5-benzyl-1-phenylhept-3-en-1-one (**47**) (58%, 32.2 mg)

Appearance: Light yellow solid

**<sup>1</sup>H NMR** (500 MHz, CDCl<sub>3</sub>) δ 7.86 – 7.84 (m, 2H), 7.55 – 7.51 (m, 1H), 7.44 – 7.41 (m, 2H), 7.28 – 7.27 (m, 2H), 7.20 – 7.16 (m, 3H), 5.69 – 5.68 (m, 2H), 3.24 (d, *J* = 7.2 Hz, 2H), 3.04 – 2.97 (m, 1H), 2.73 (d, *J* = 7.0 Hz, 2H), 1.94 – 1.88 (m, 2H), 0.85 (t, *J* = 7.3 Hz, 3H).

**<sup>13</sup>C NMR** (126 MHz, CDCl<sub>3</sub>) δ 199.7, 140.0, 137.5, 132.8, 132.8, 131.2, 129.5, 128.5, 128.2, 128.1, 126.0, 43.2, 41.7, 40.2, 25.5, 13.7.

**TLC** *R<sub>f</sub>* = 0.50 in hexane/ethyl acetate 20:1

**HRMS** (ESI +ve, *m/z*) Calculated for C<sub>20</sub>H<sub>22</sub>ONa [M+Na]<sup>+</sup> 301.1562; found: 301.1566.

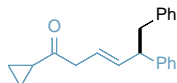

48

(*E*)-1-cyclopropyl-5-methyl-6-phenylhex-3-en-1-one (**48**) (44%, 25.1 mg)

Appearance: Light yellow solid

**<sup>1</sup>H NMR** (500 MHz, CDCl<sub>3</sub>) δ 7.34 – 7.27 (m, 6H), 7.21 – 7.18 (m, 4H), 6.13 (dd, *J* = 15.9, 8.0 Hz, 1H), 5.93 (dt, *J* = 15.9, 7.2 Hz, 1H), 3.12 (dt, *J* = 7.2, 6.6 Hz, 1H), 2.78 (d, *J* = 7.3 Hz, 2H), 2.68 – 2.66 (m, 2H), 1.92 – 1.88 (m, 1H), 1.00 – 0.97 (m, 2H), 0.84 – 0.81 (m, 2H).

**<sup>13</sup>C NMR** (126 MHz, CDCl<sub>3</sub>) δ 209.7, 139.6, 137.4, 132.7, 130.2, 129.4, 128.5, 128.3, 127.1, 126.1, 126.1, 48.1, 41.4, 40.3, 21.0, 10.8.

**TLC** *R<sub>f</sub>* = 0.50 in hexane/ethyl acetate 20:1

**HRMS** (APCI +ve, *m/z*) Calculated for C<sub>21</sub>H<sub>23</sub>O [M+H]<sup>+</sup> 291.1743; found: 291.1740.

## 9. $^1\text{H}$ and $^{13}\text{C}$ NMR Spectra

### 9.1 1,6-conjugate addition electrophilic substrates

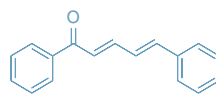

3a

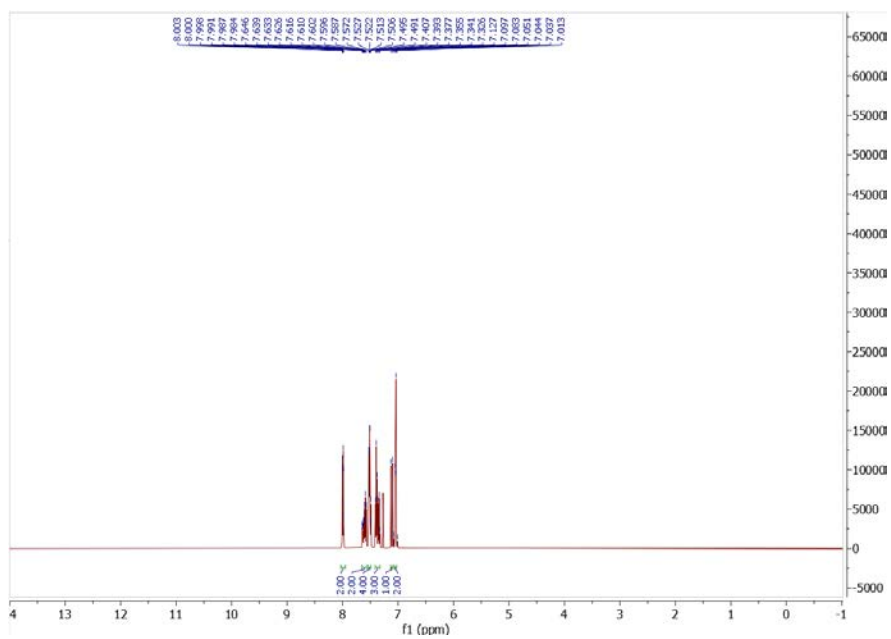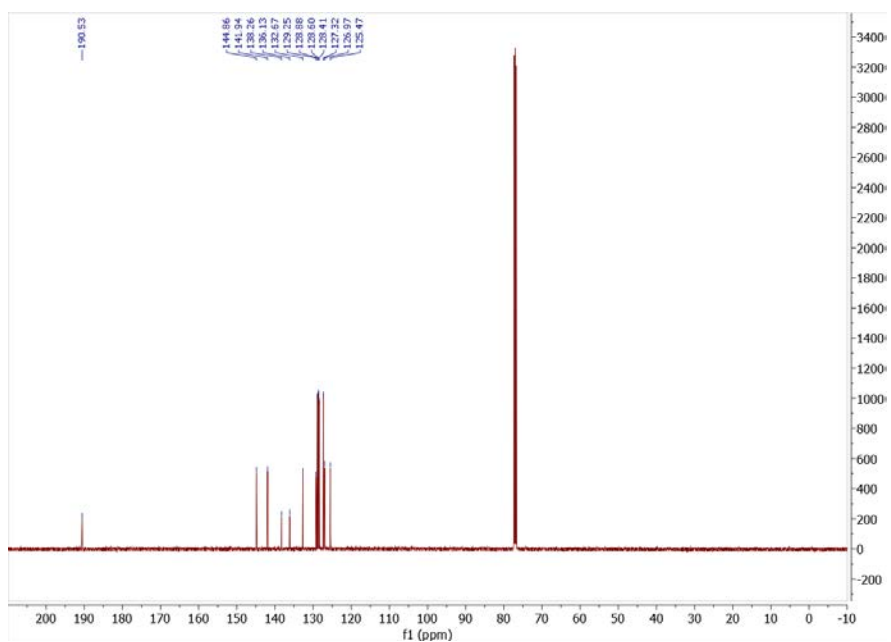

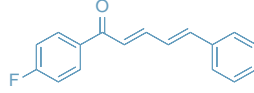

**3b**

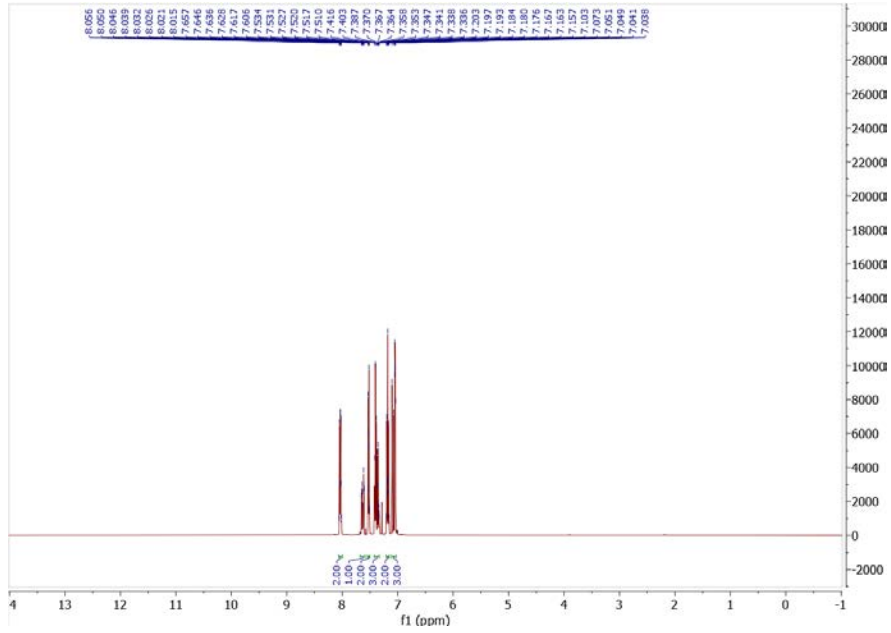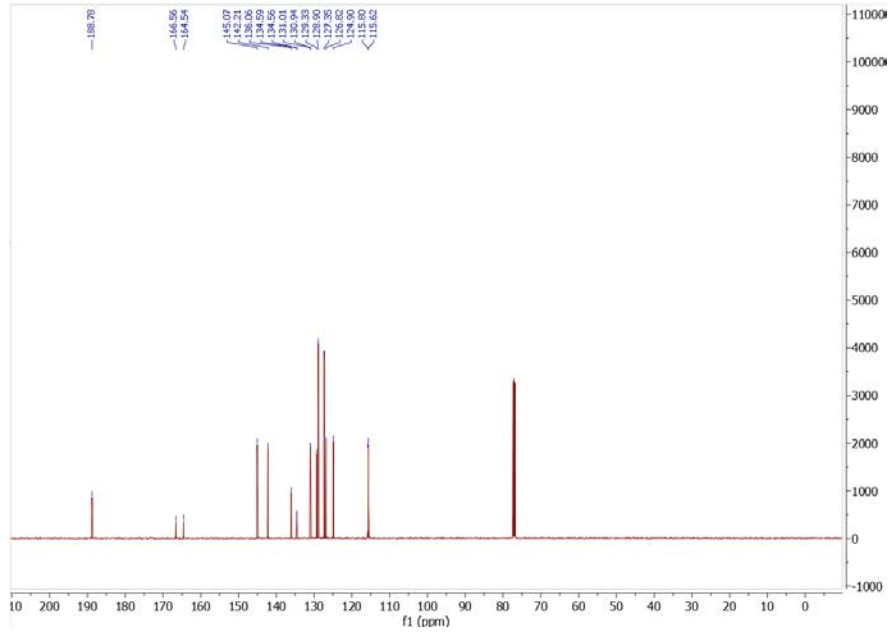



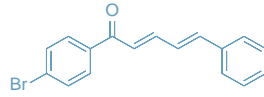

3d

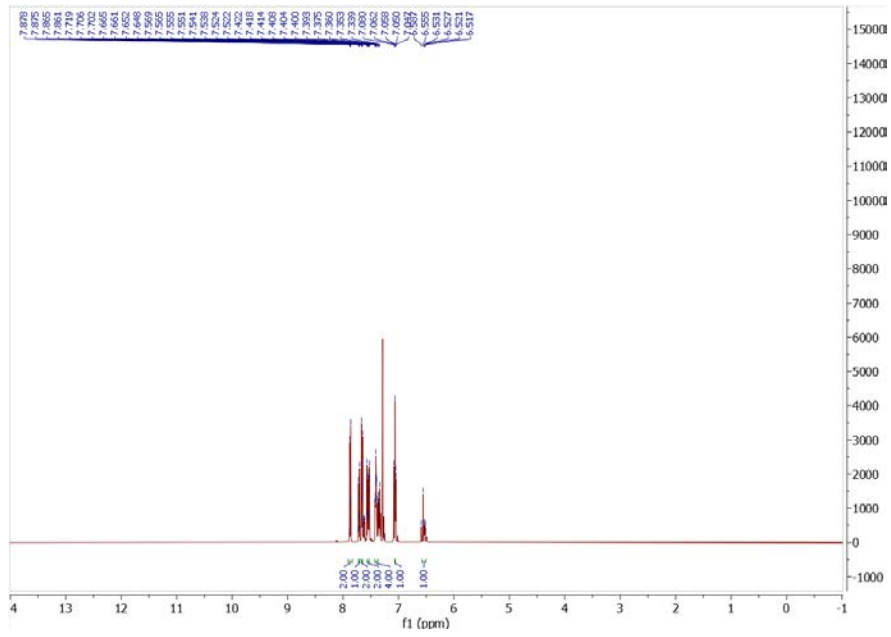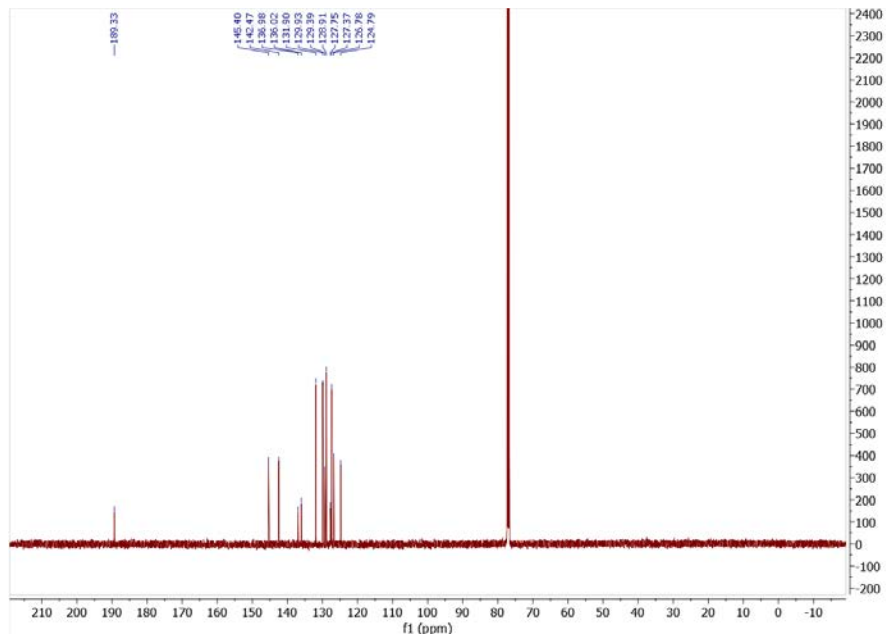

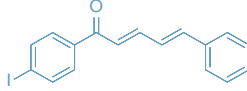

3e

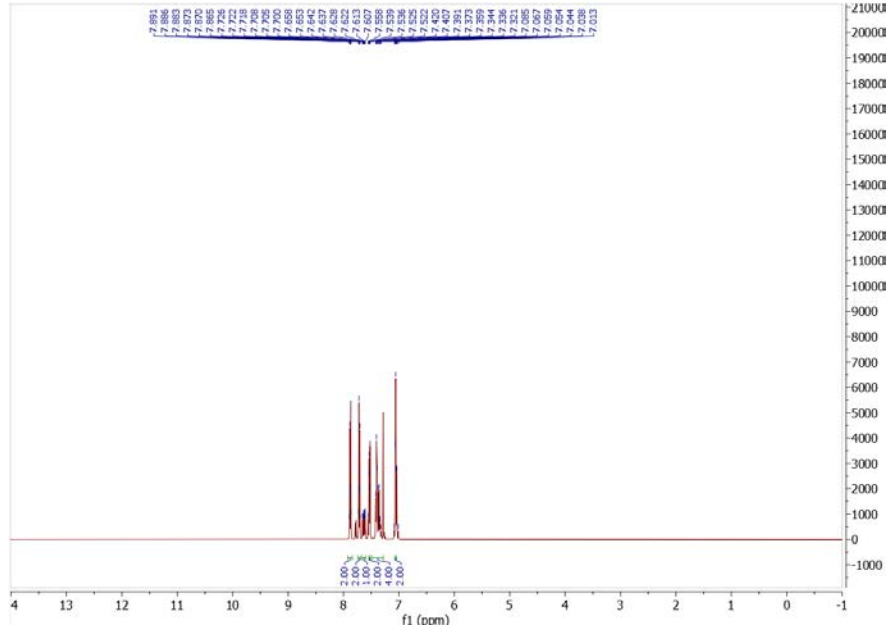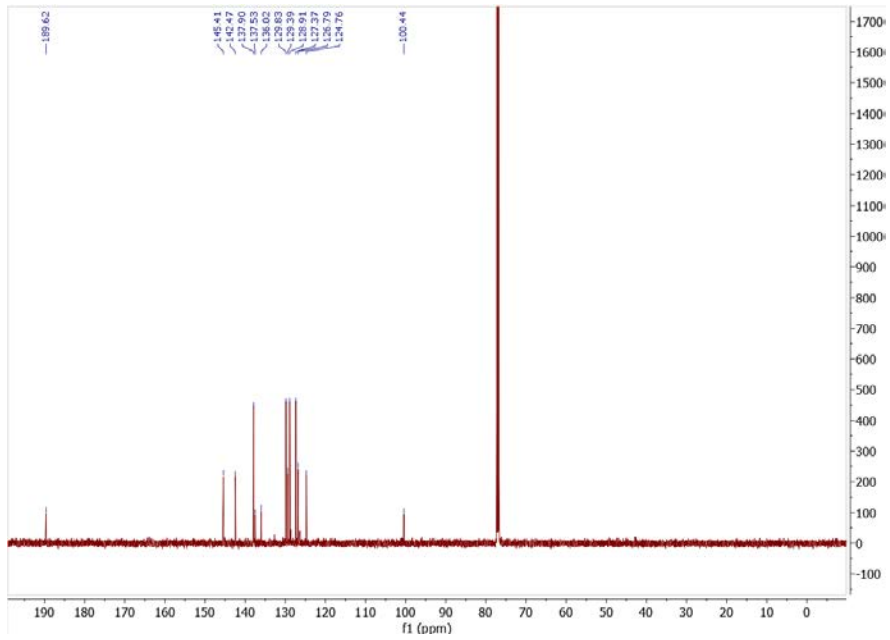

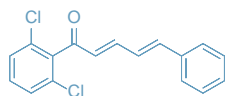

3f

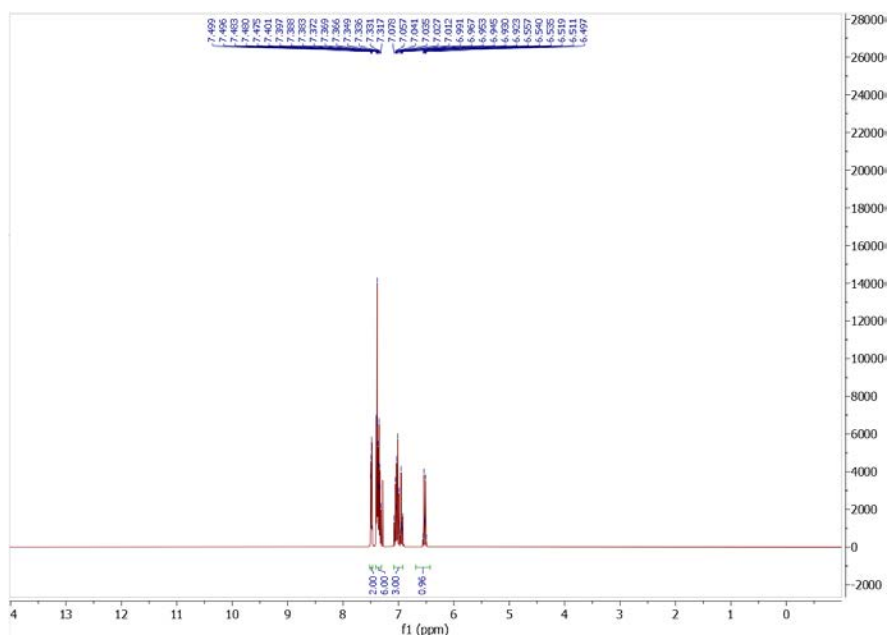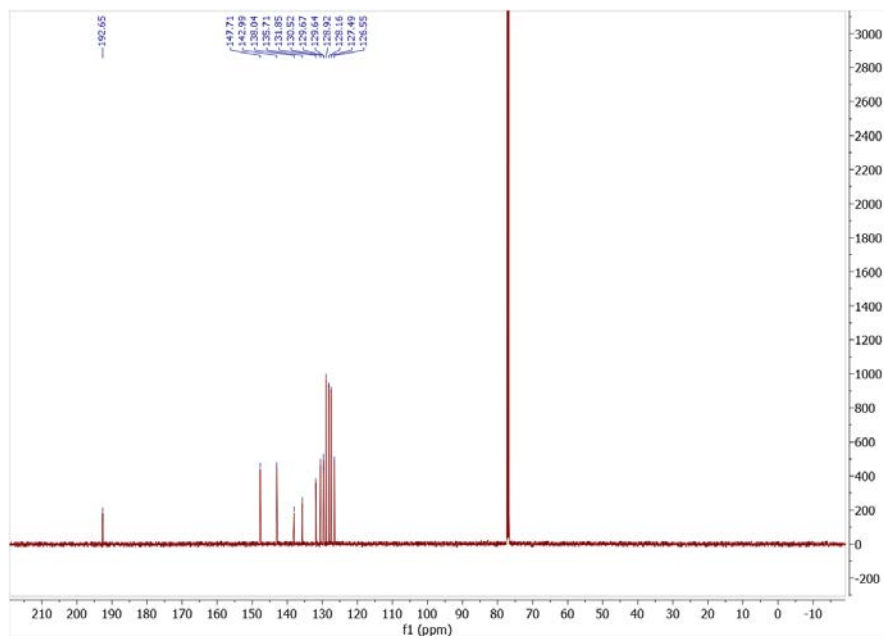





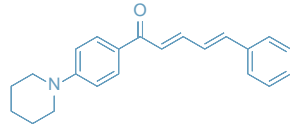

3h

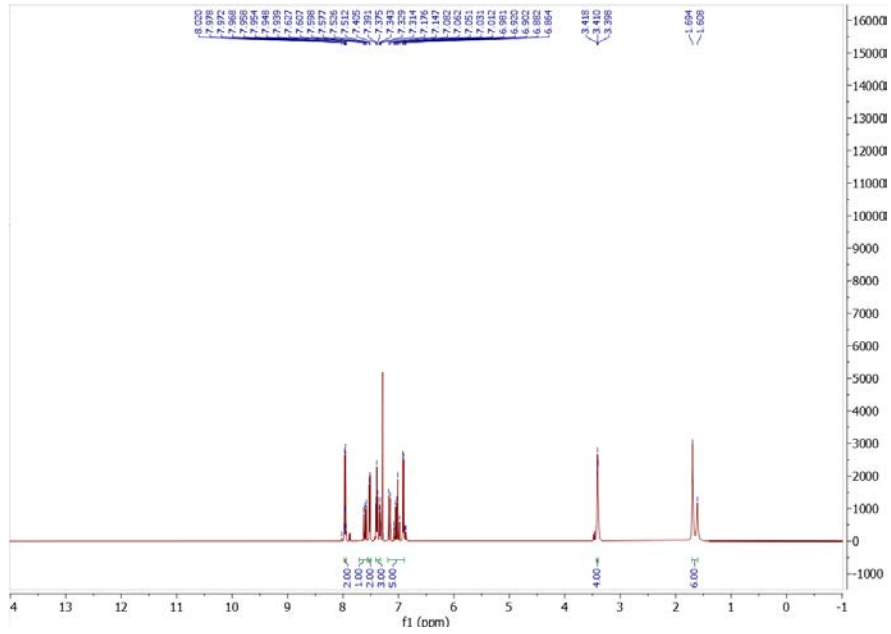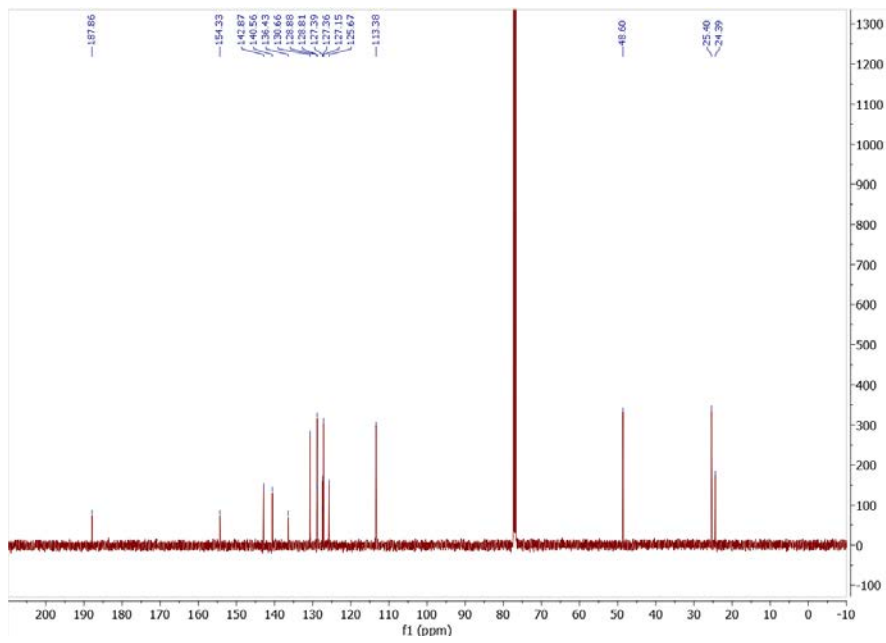

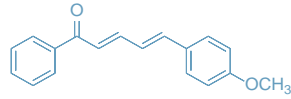

3i

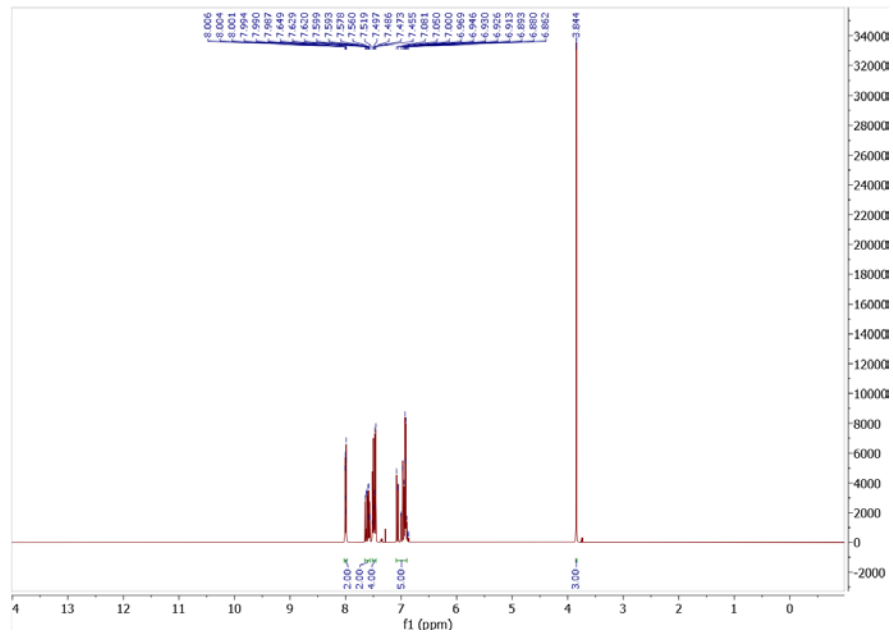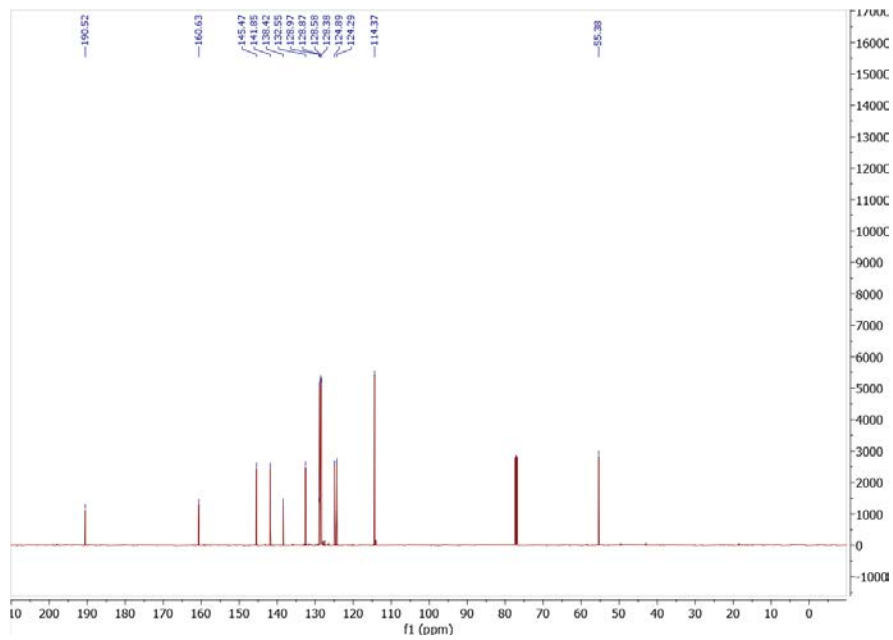

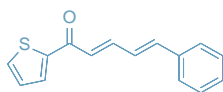

3j

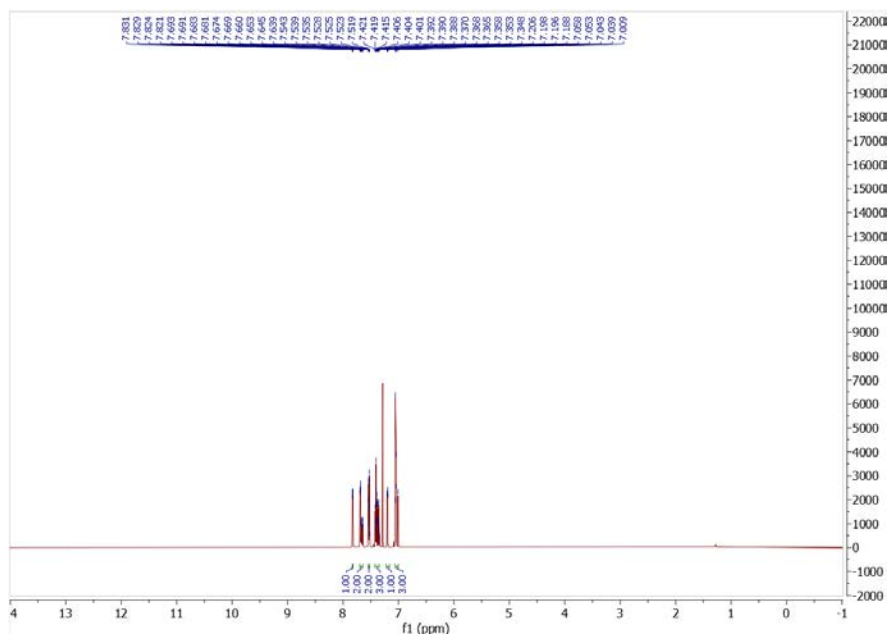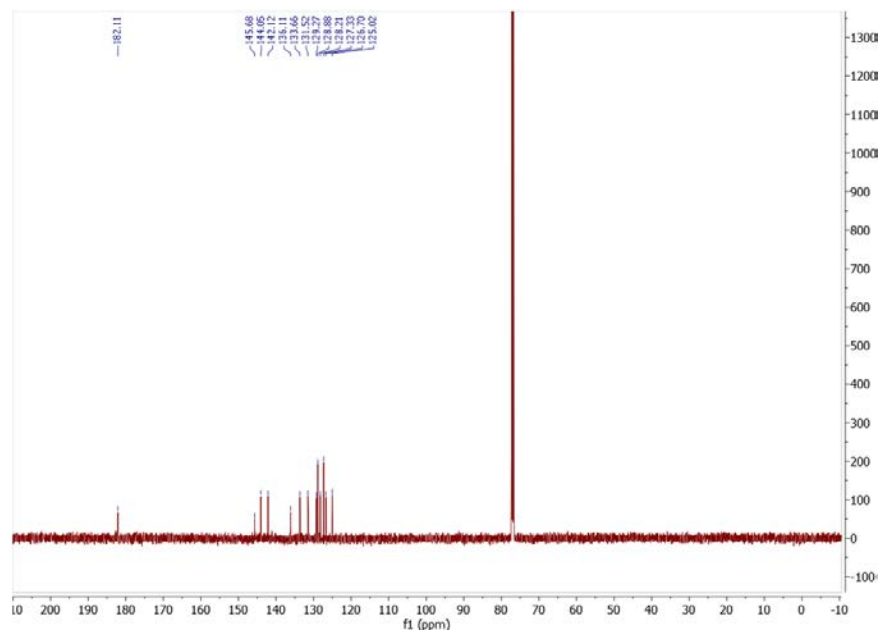

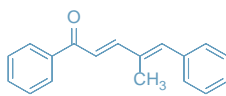

3k

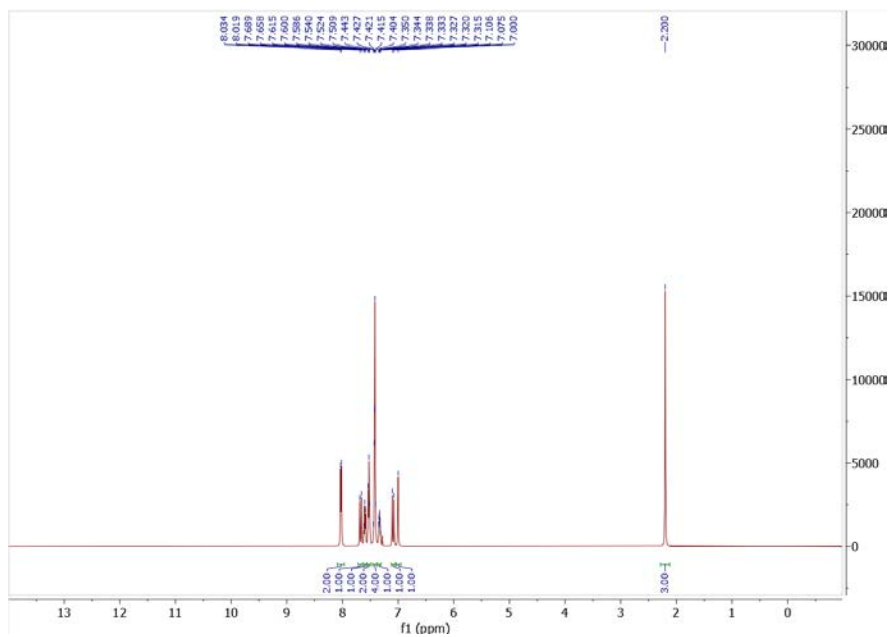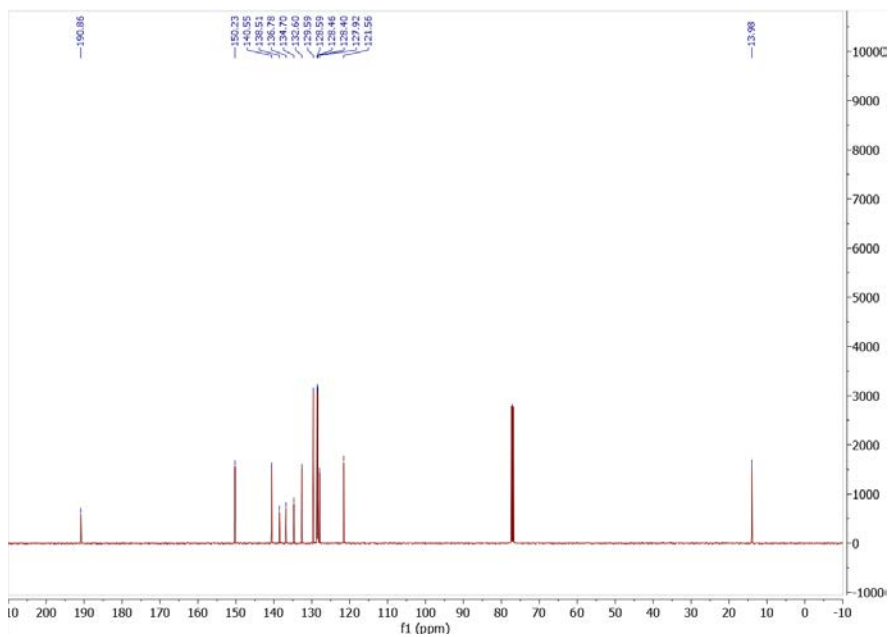



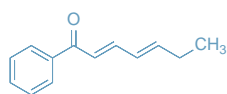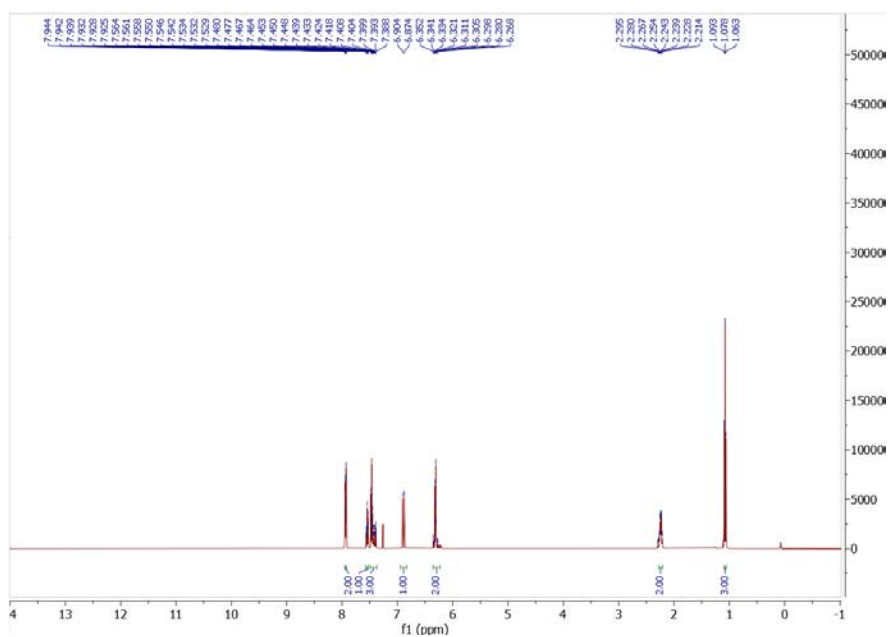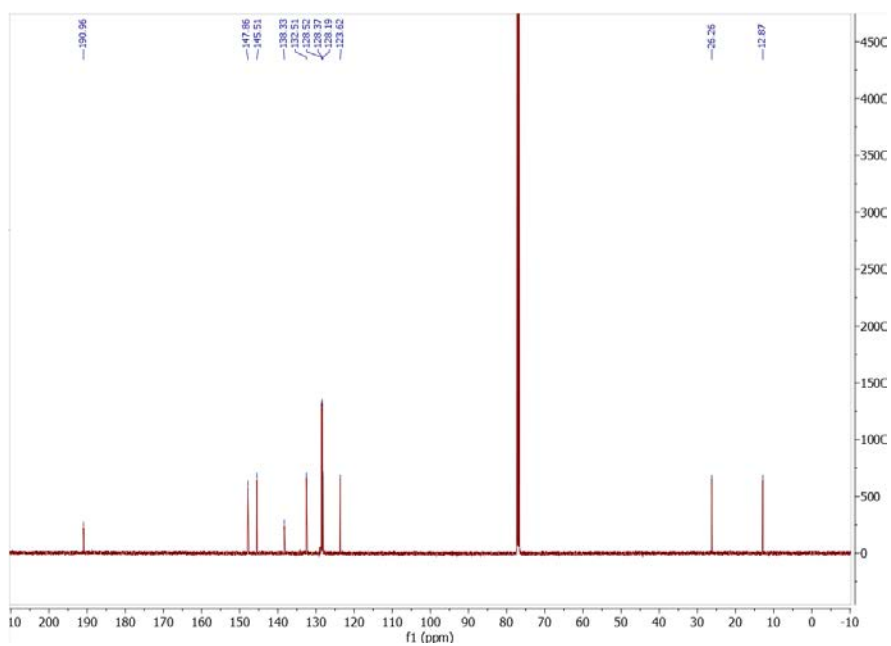

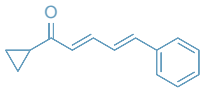

3n

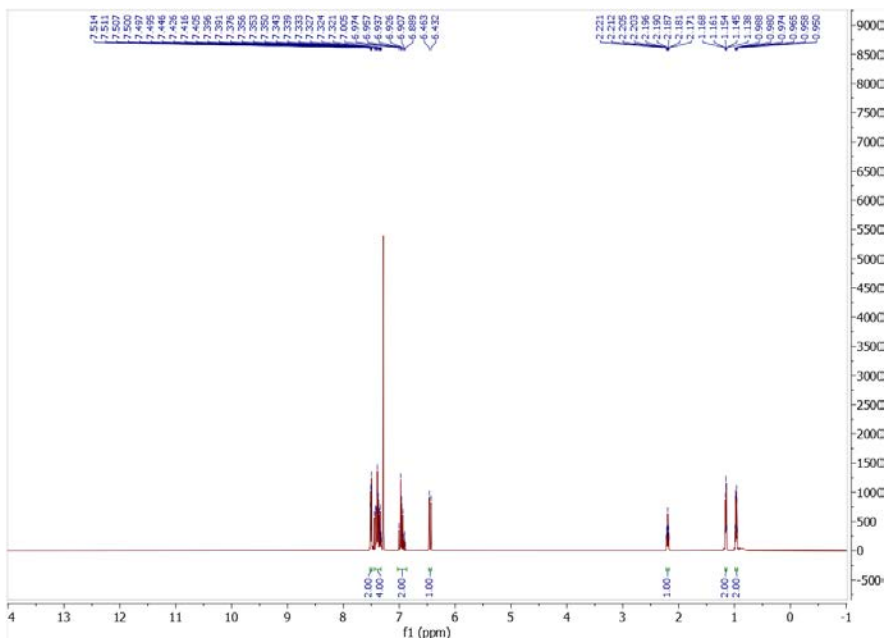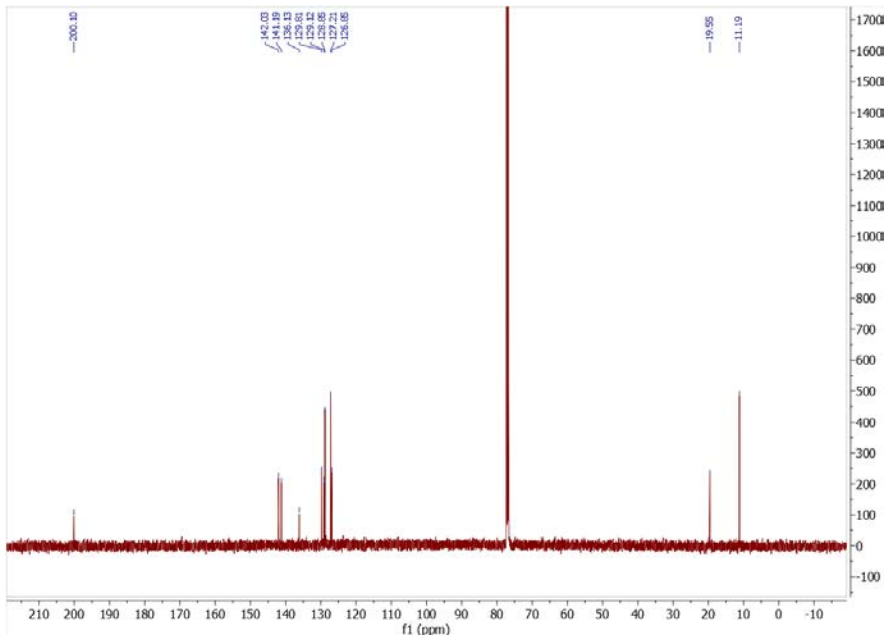

9.2 1,6-conjugate addition products.

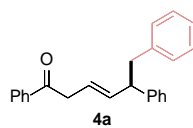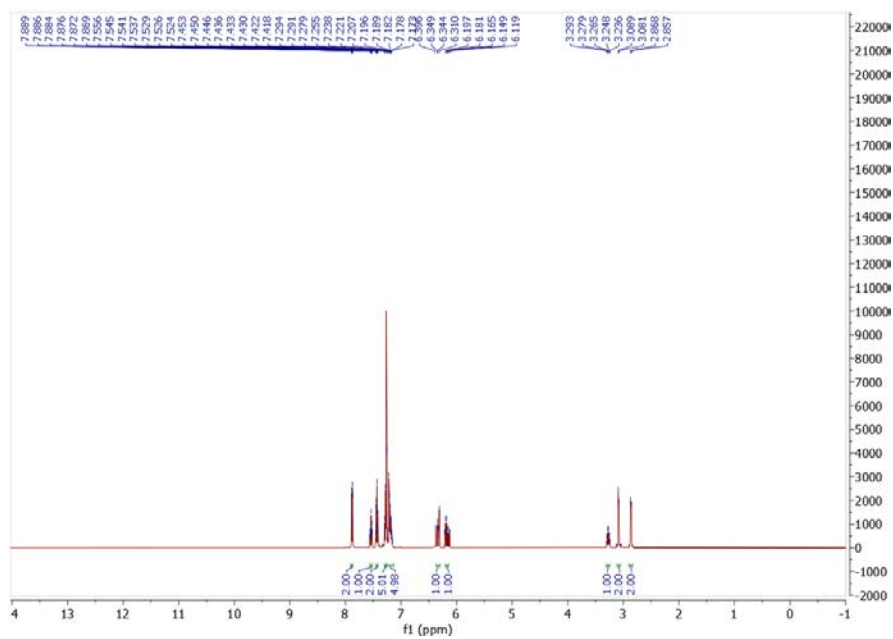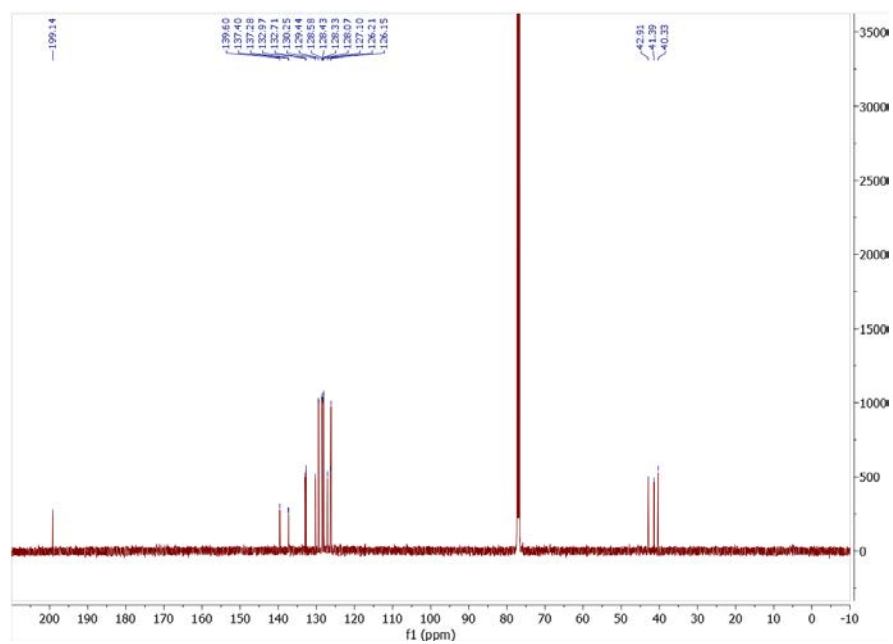



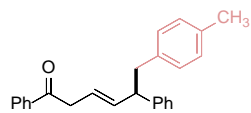

5

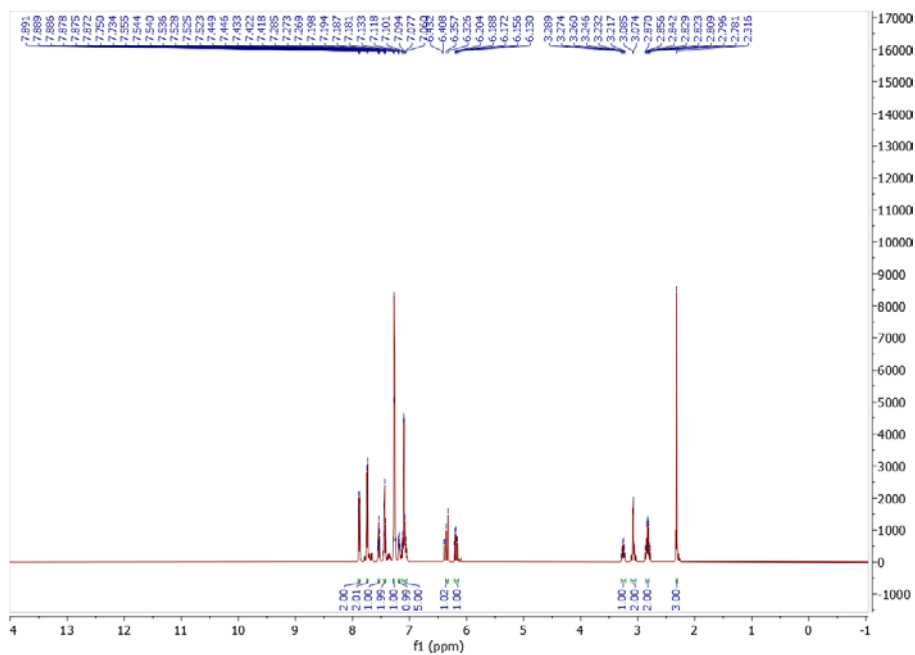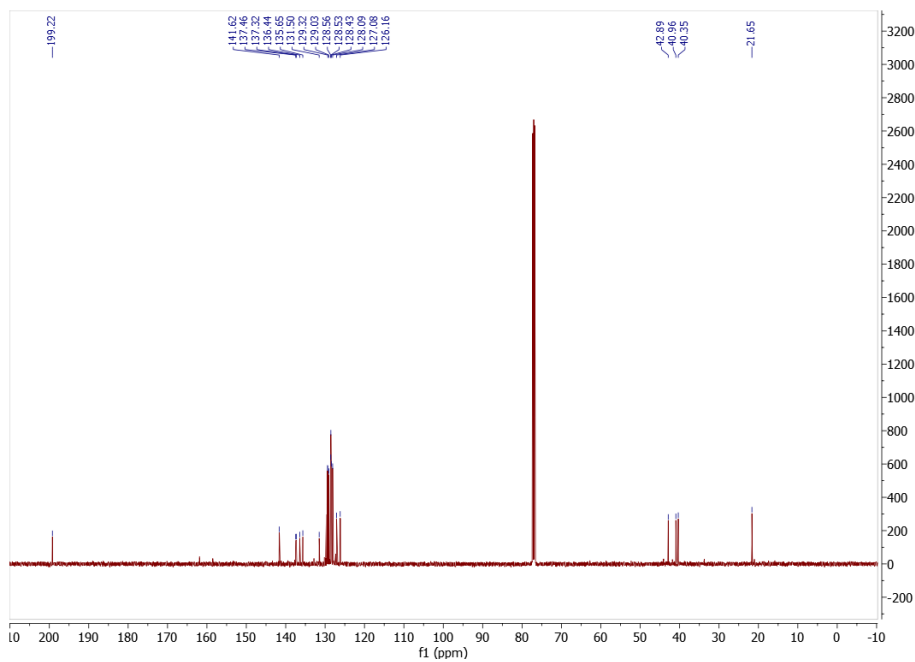

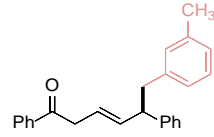

6

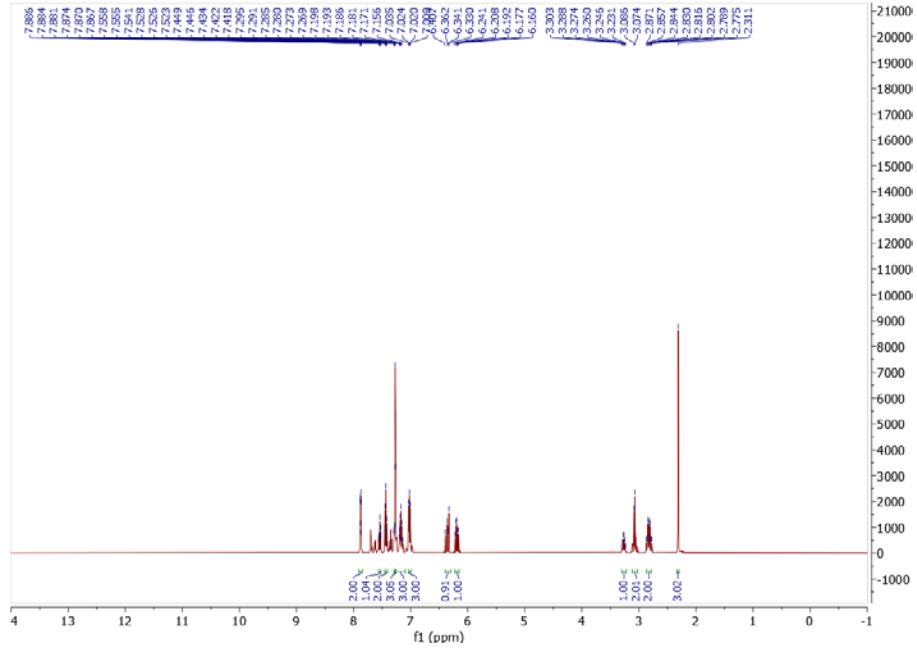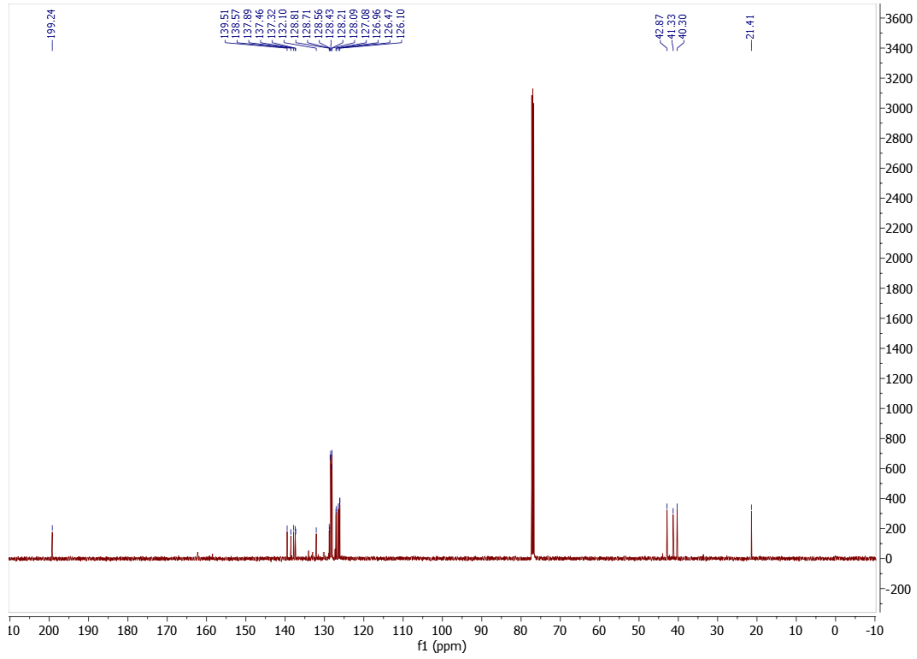

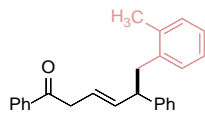

7

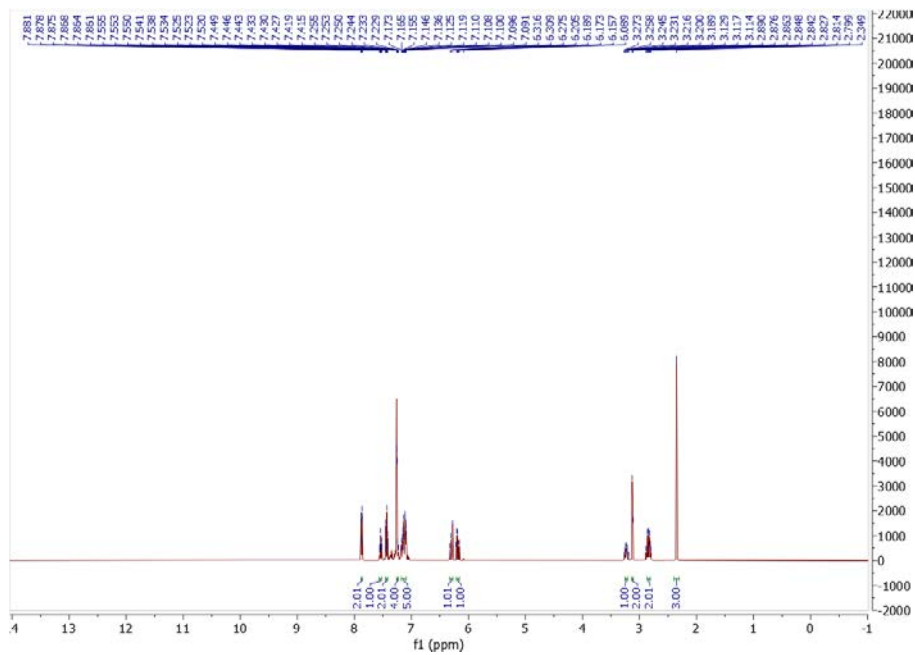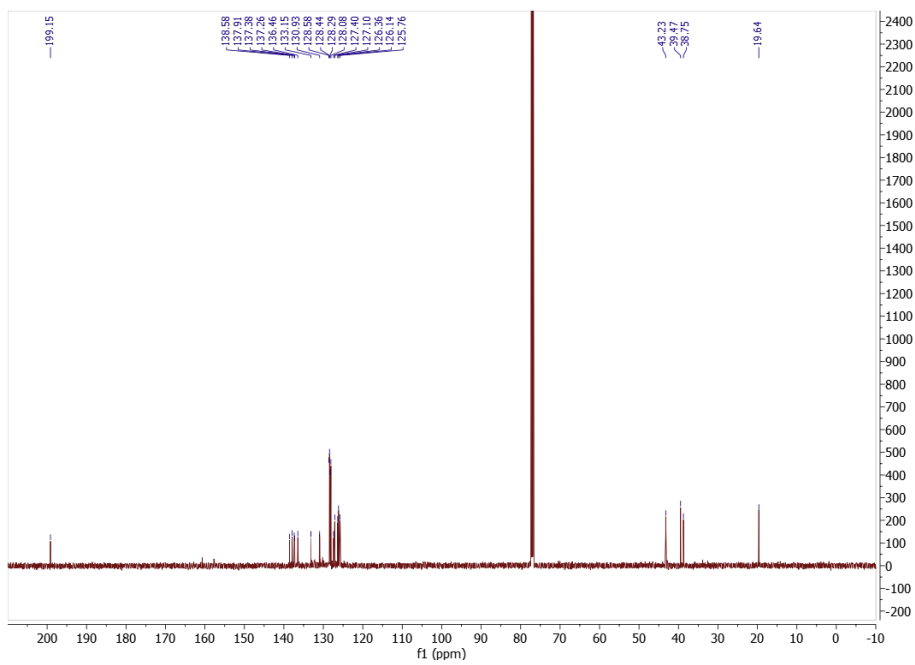

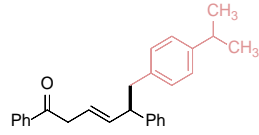

8

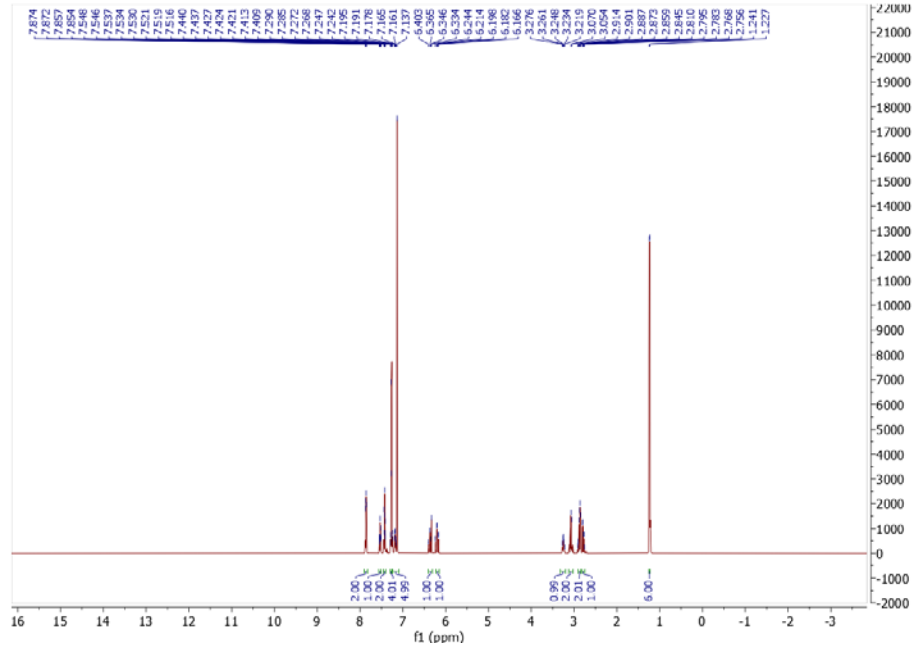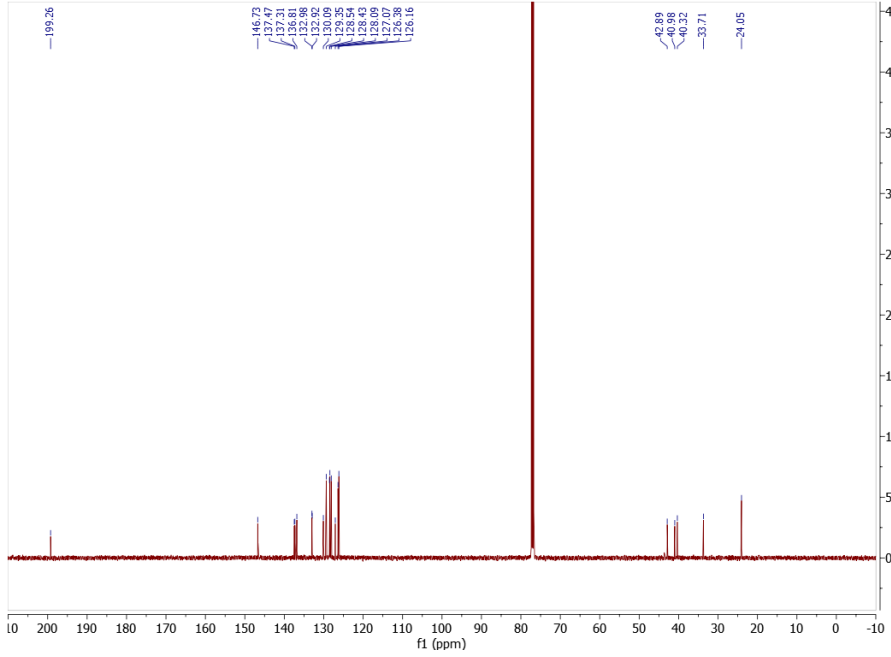

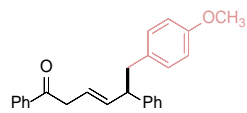

9

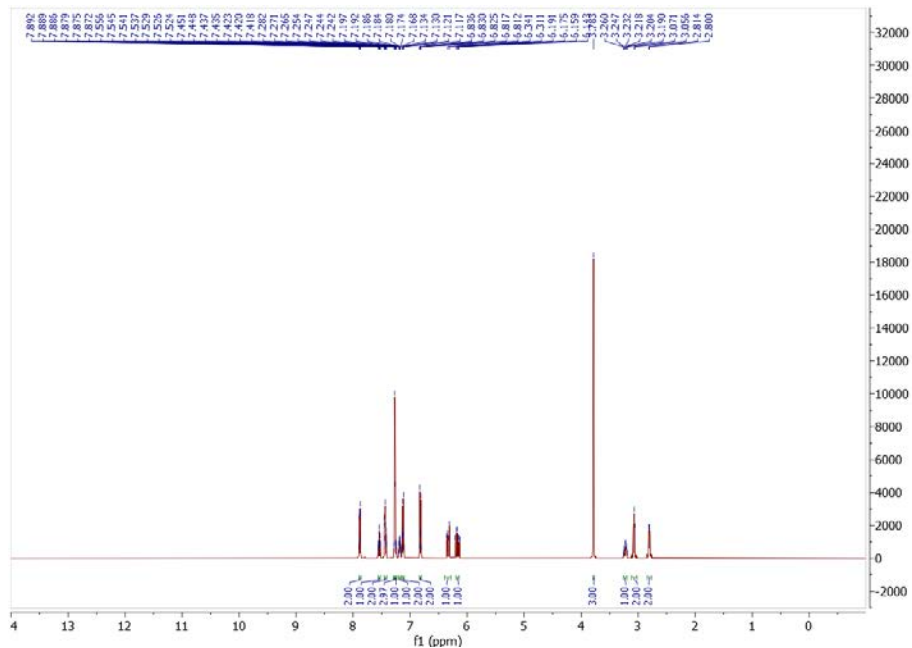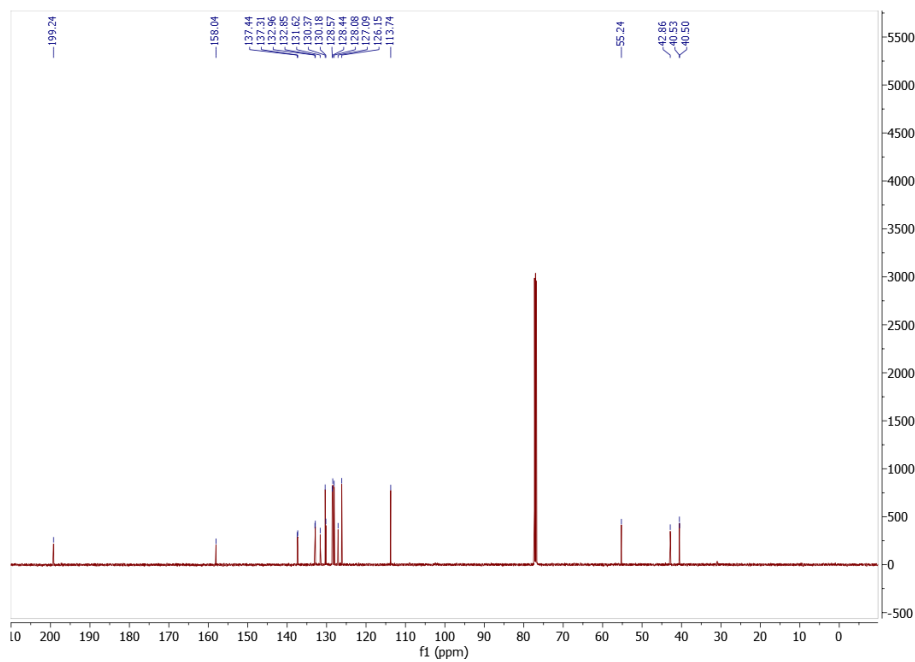

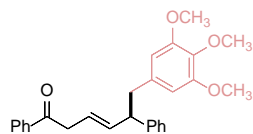

10

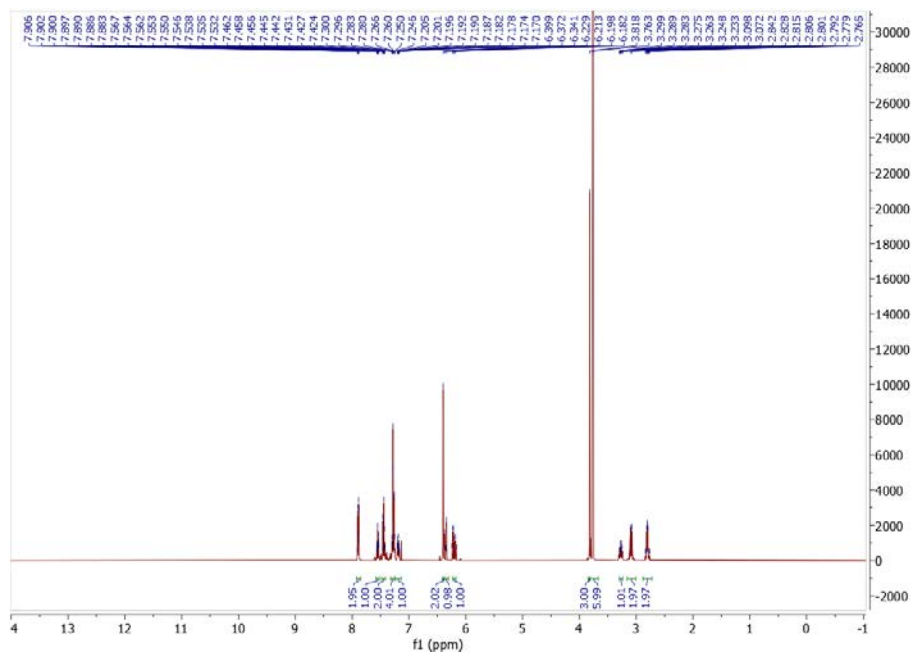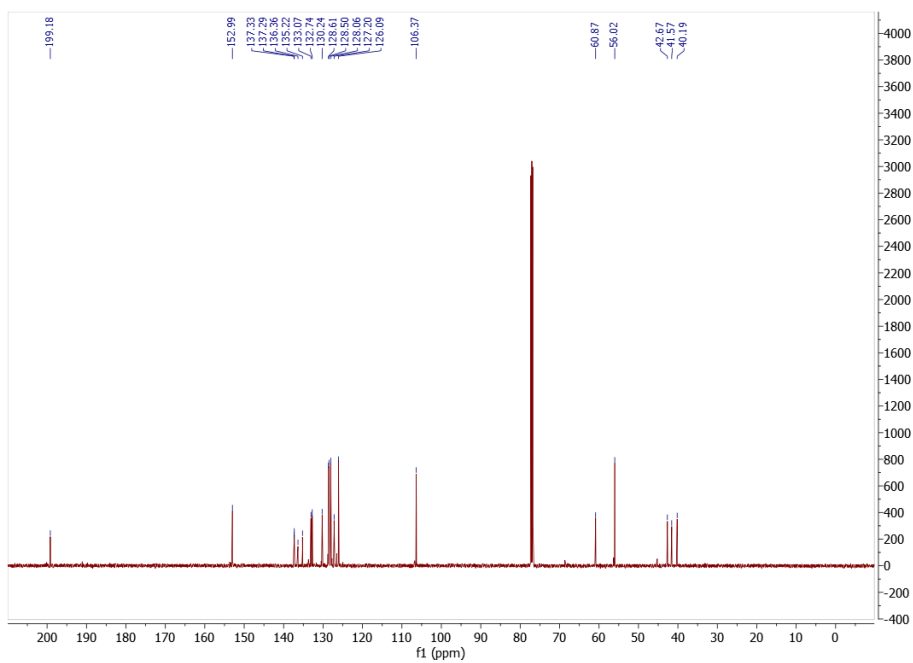

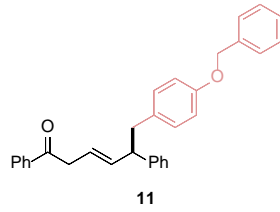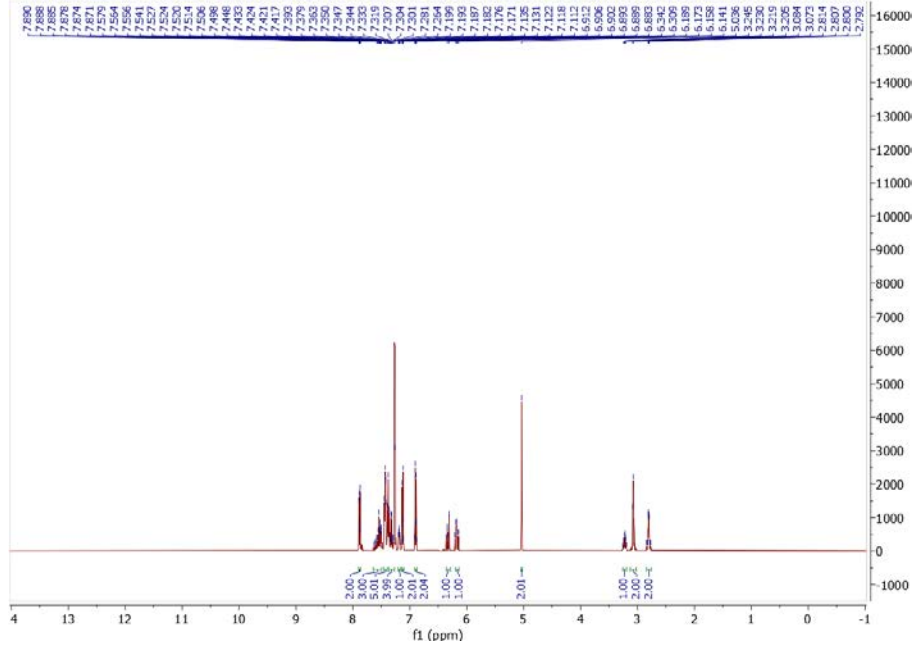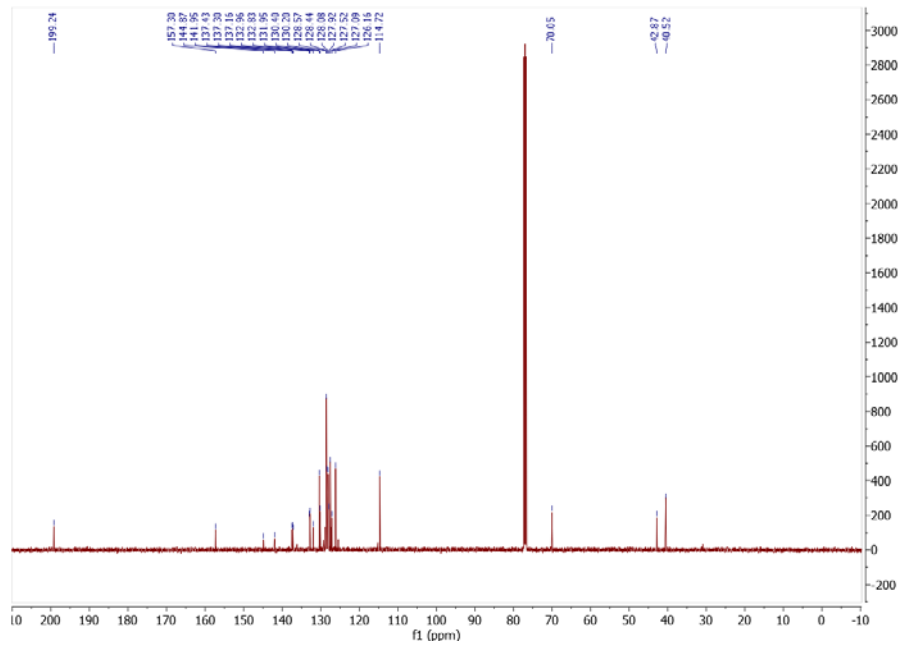

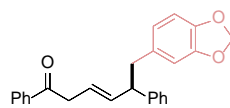

12

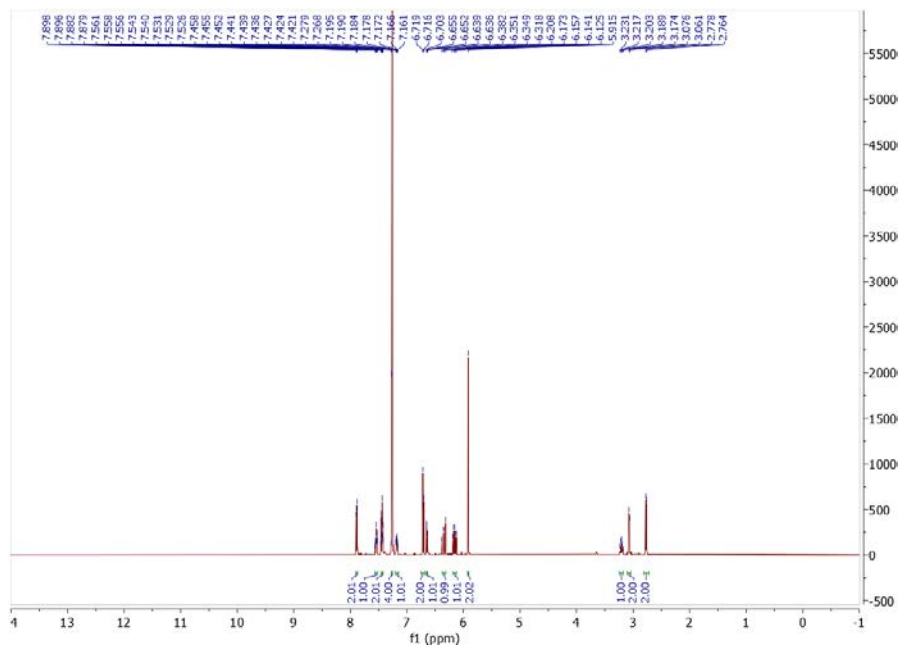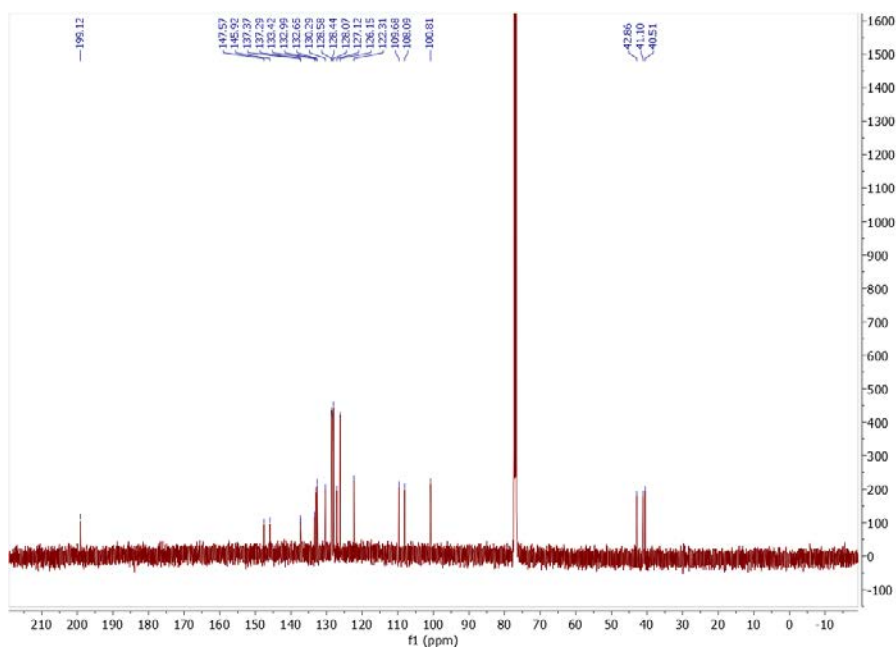



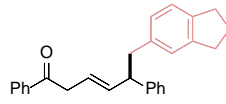

13

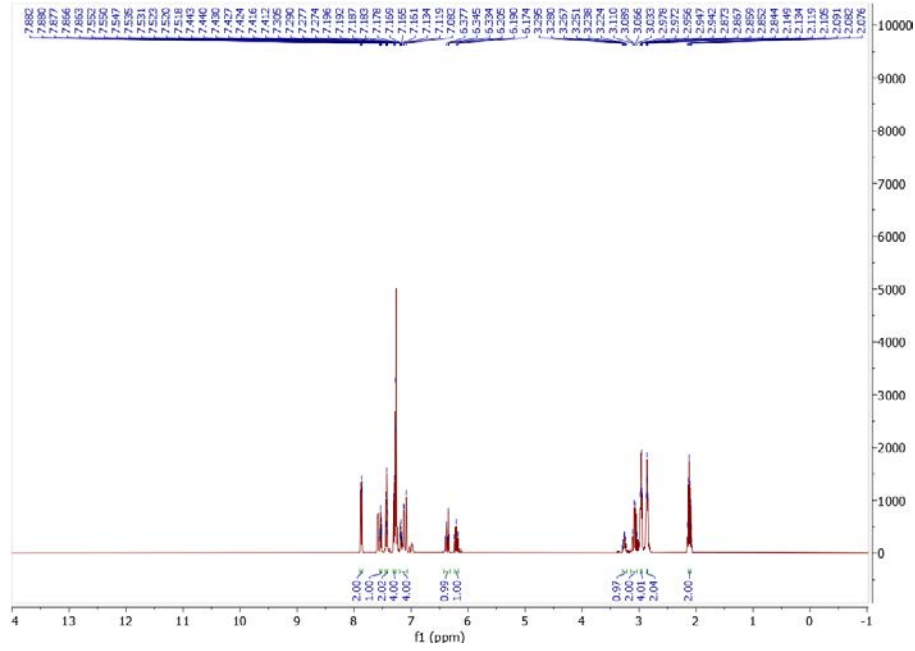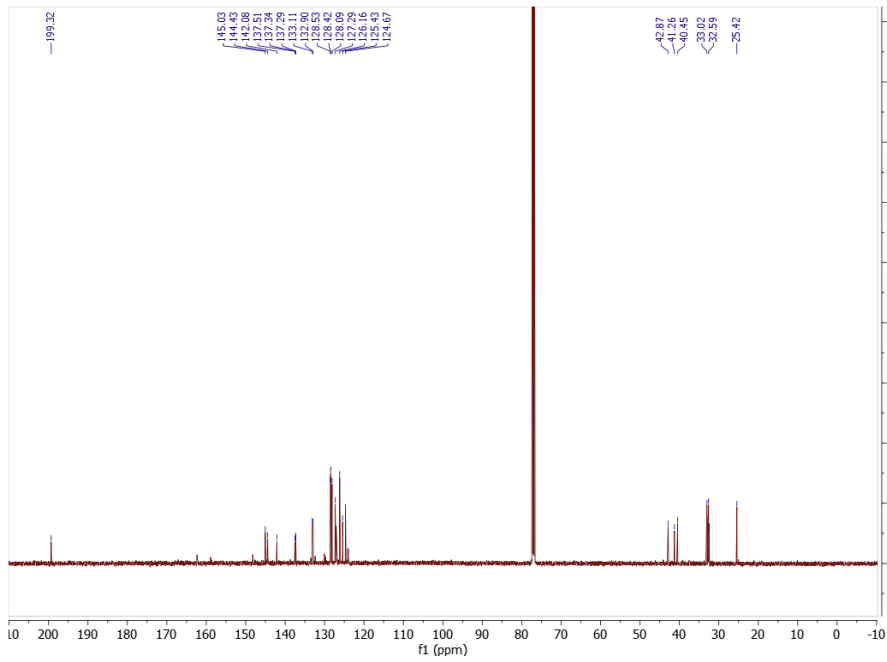

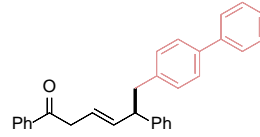

14

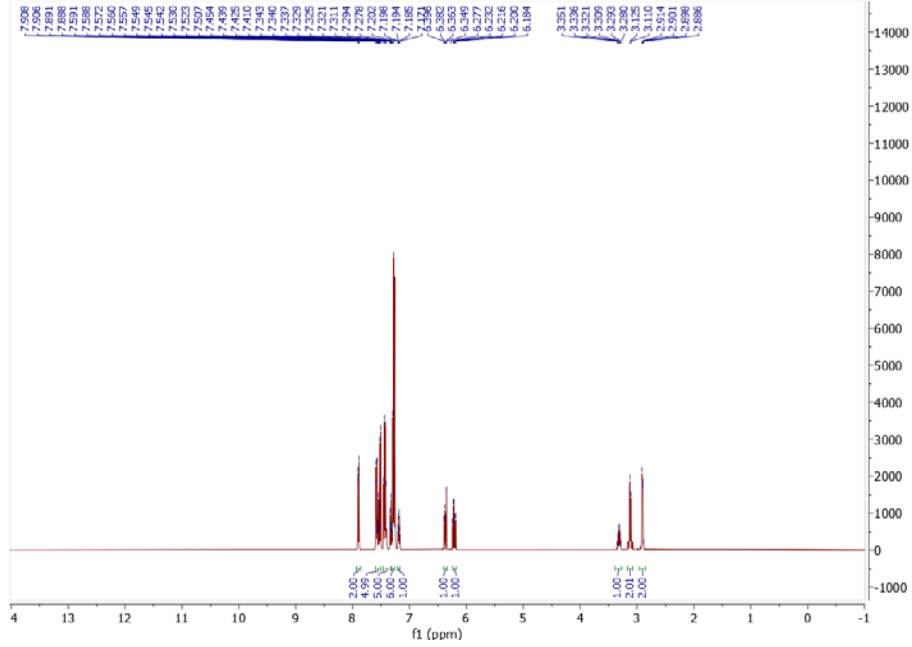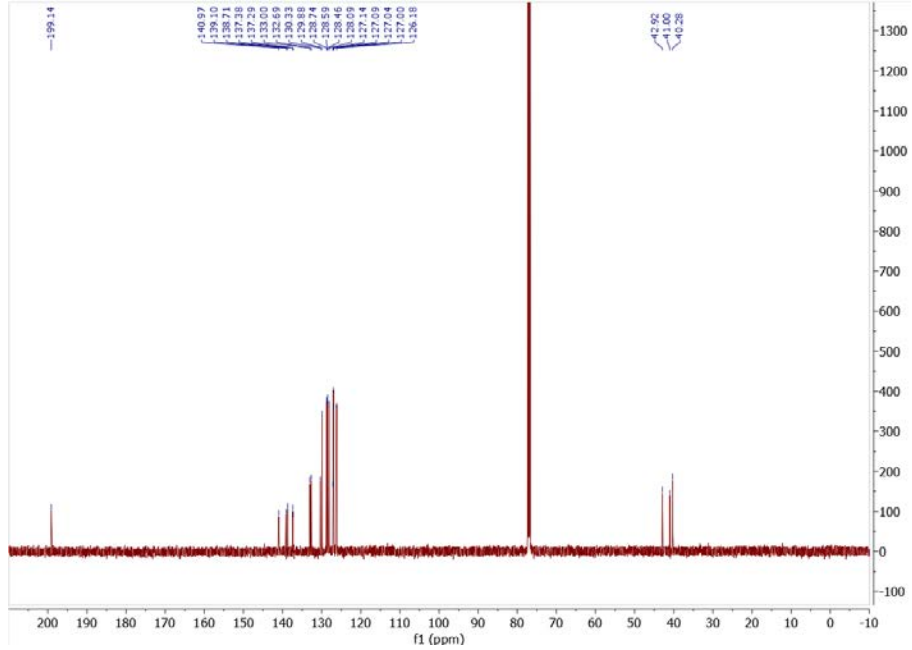

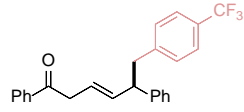

15

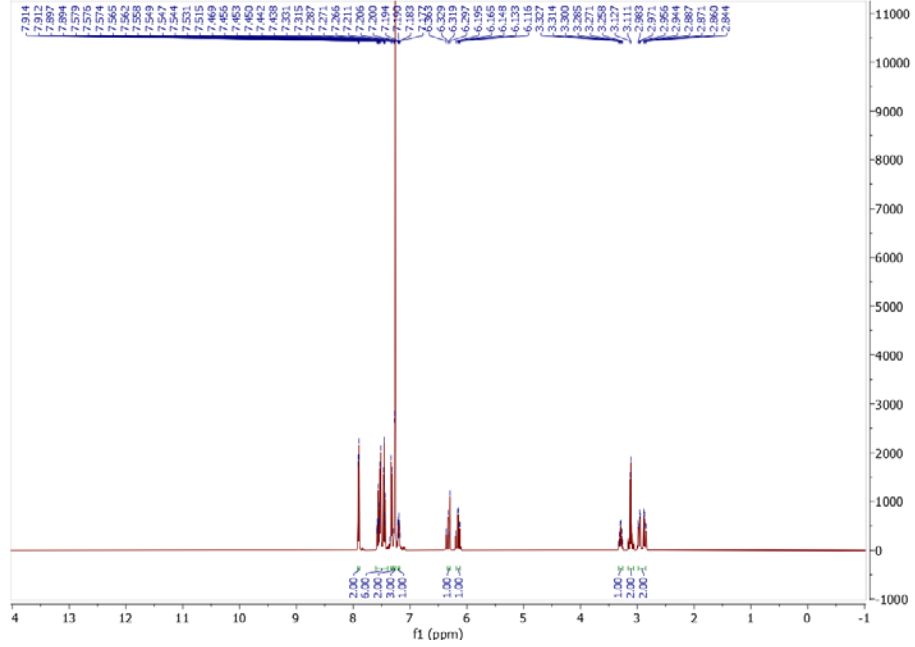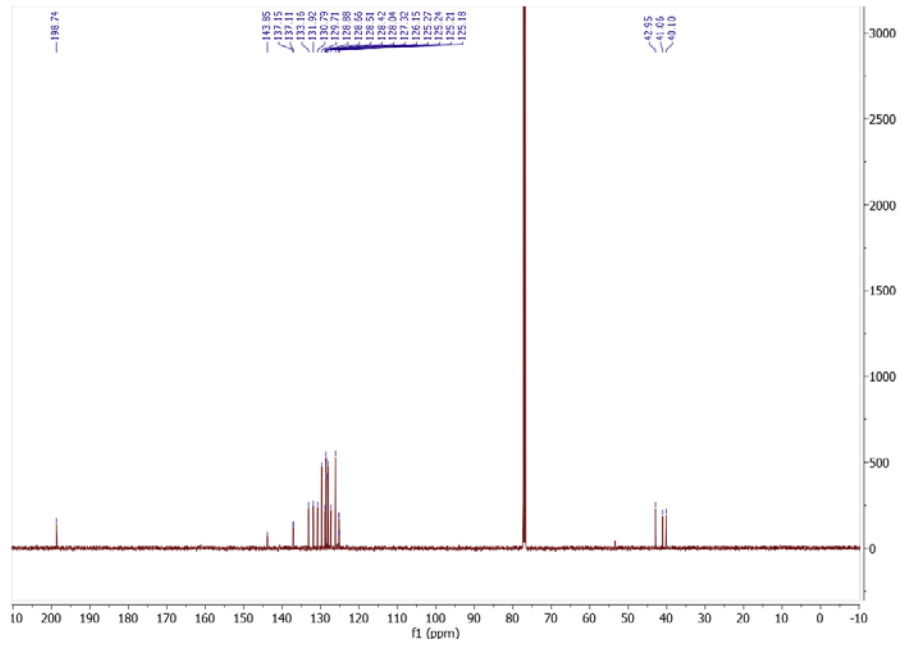

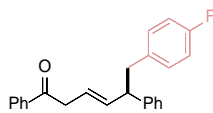

16

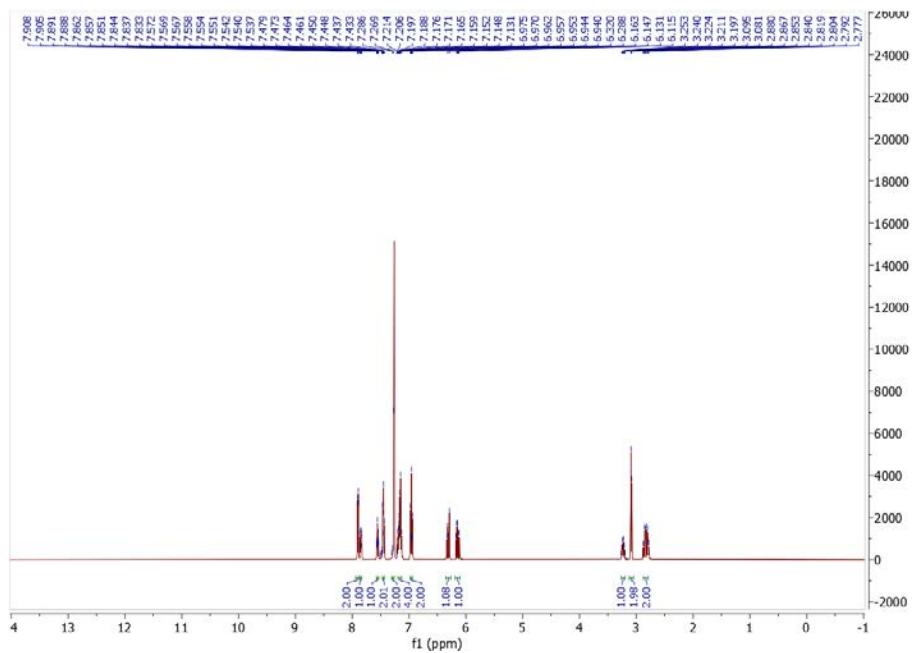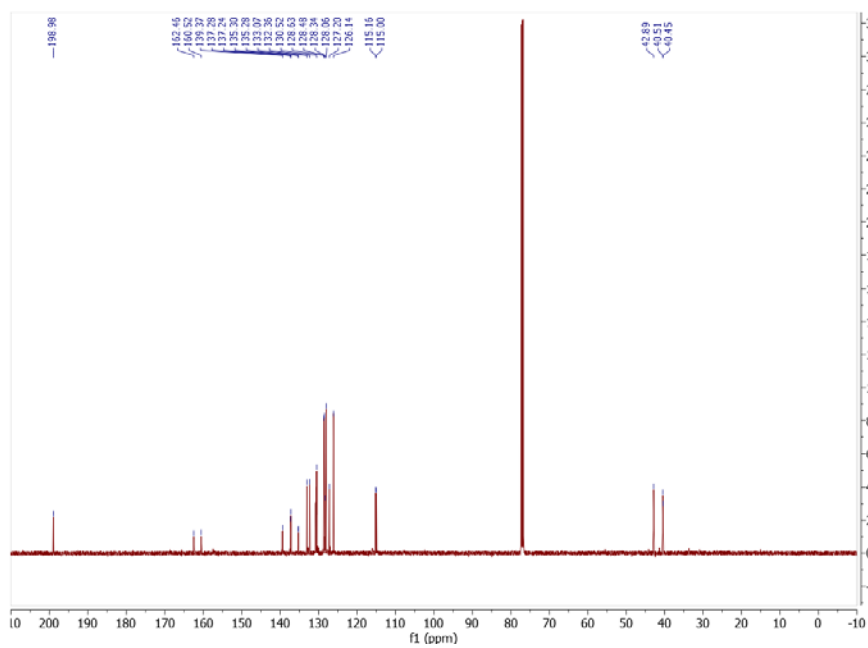

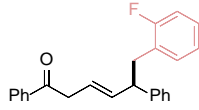

17

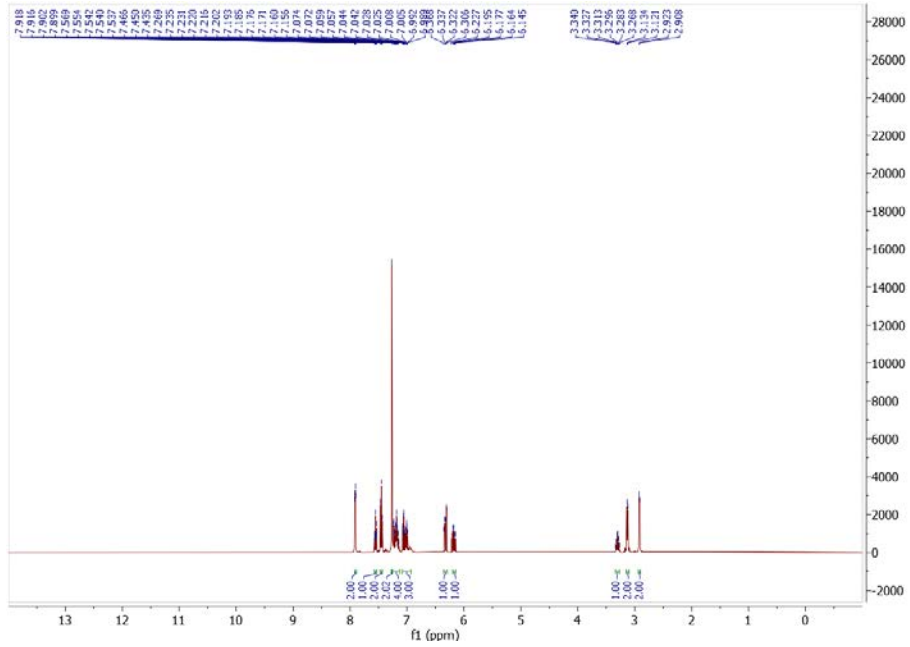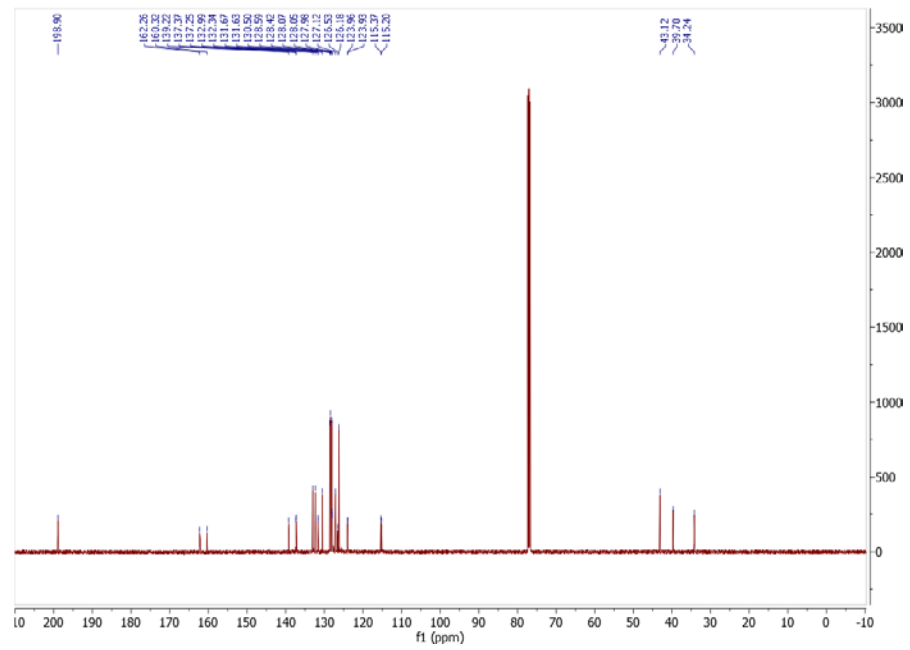

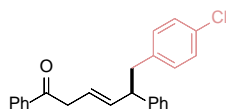

18

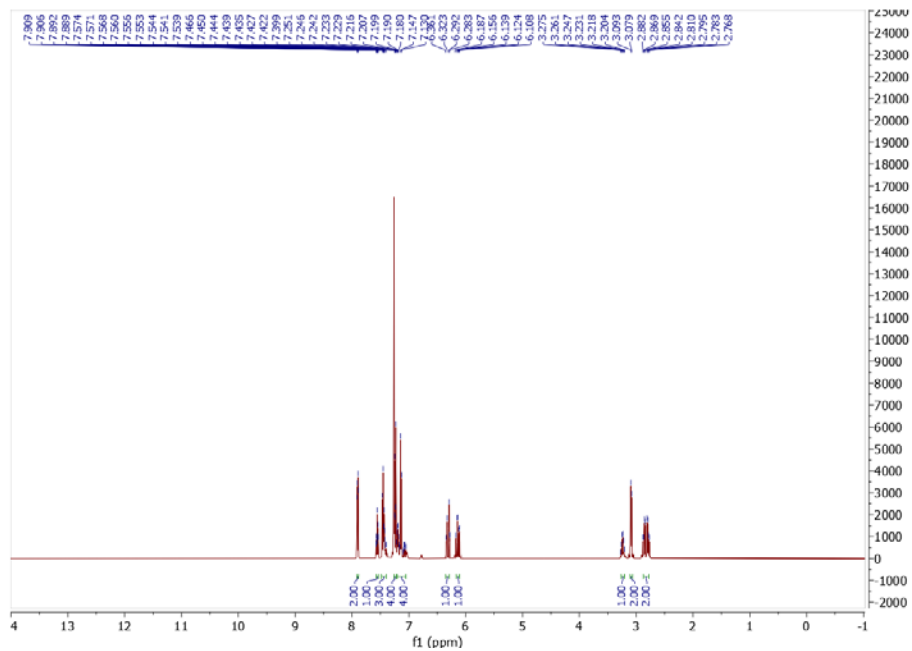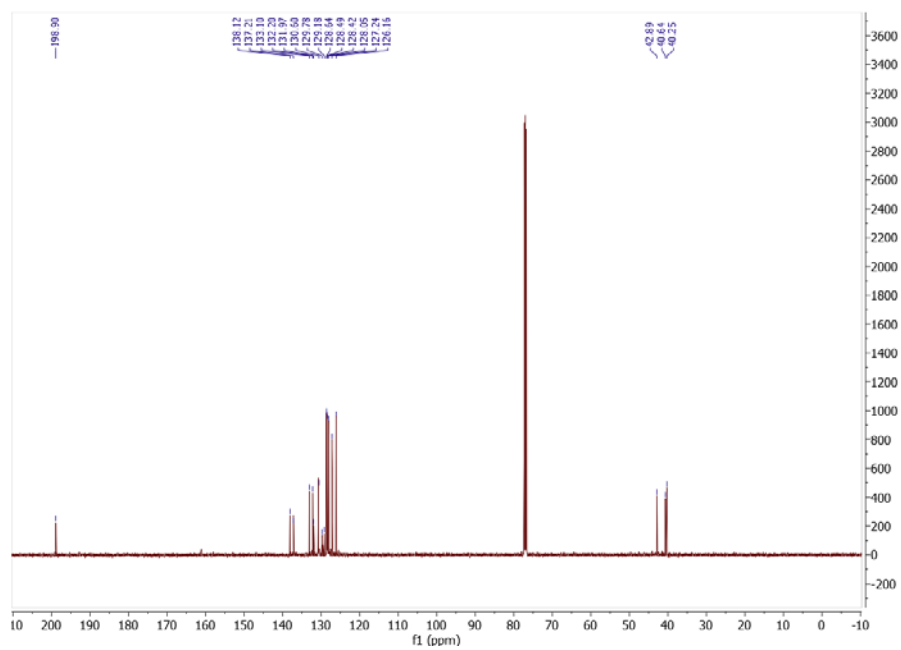

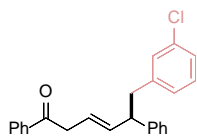

19

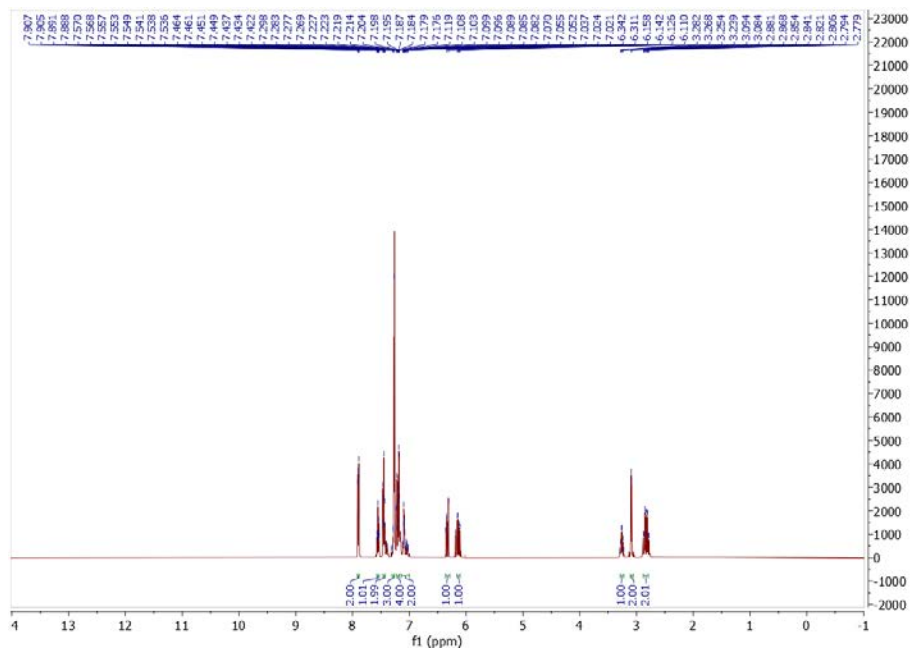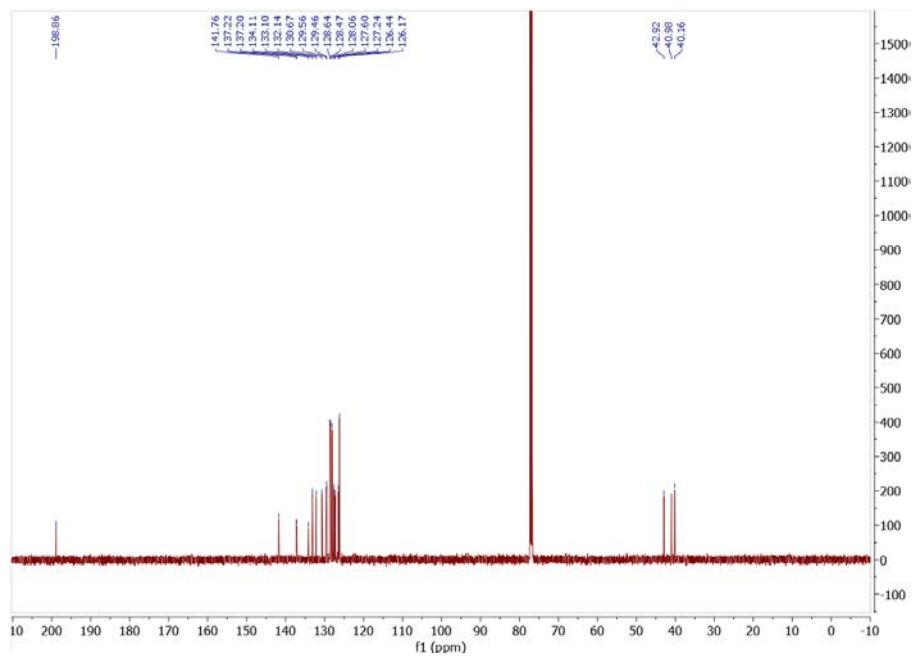





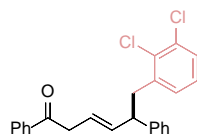

21

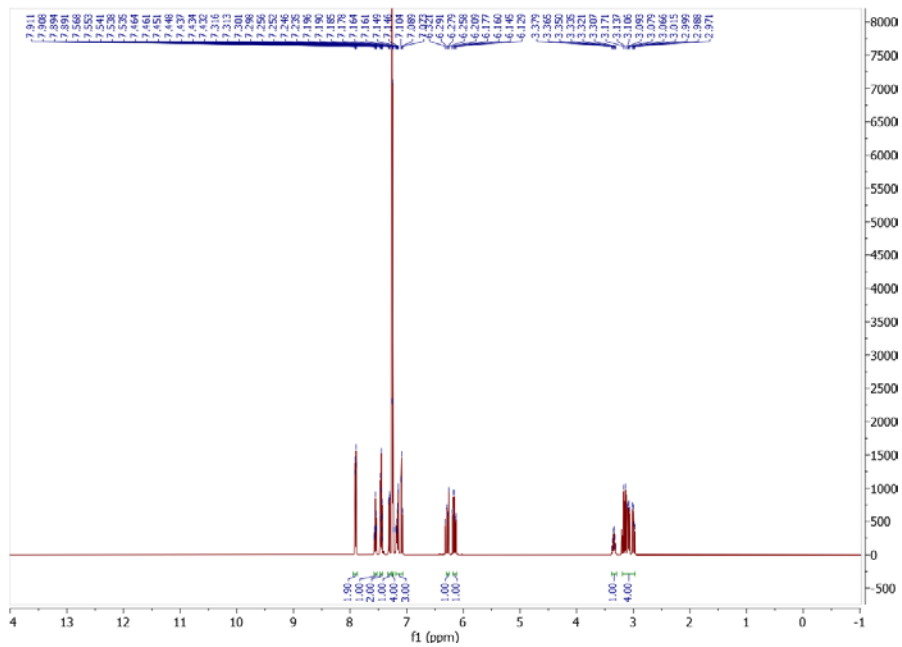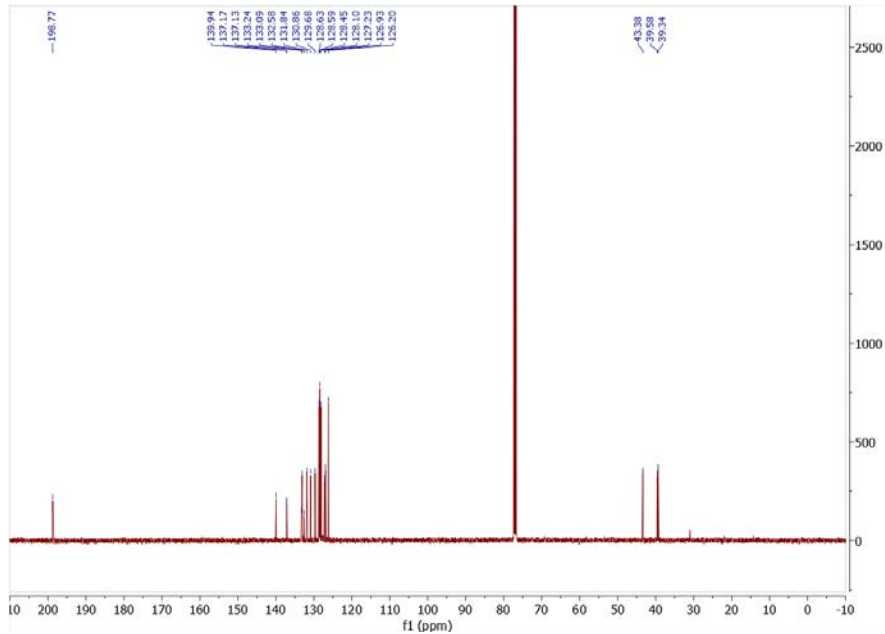

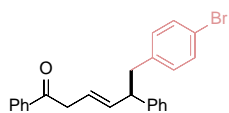

22

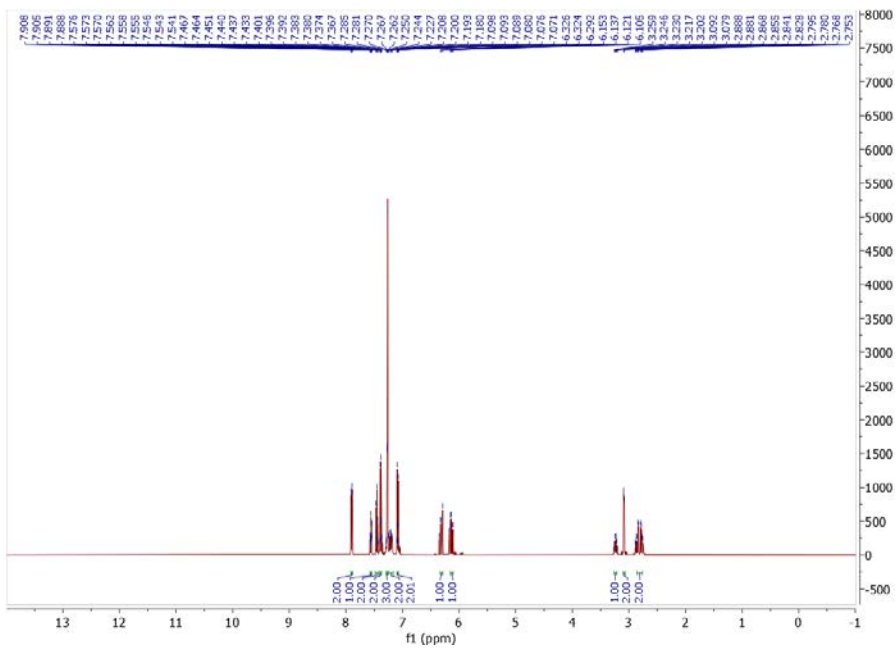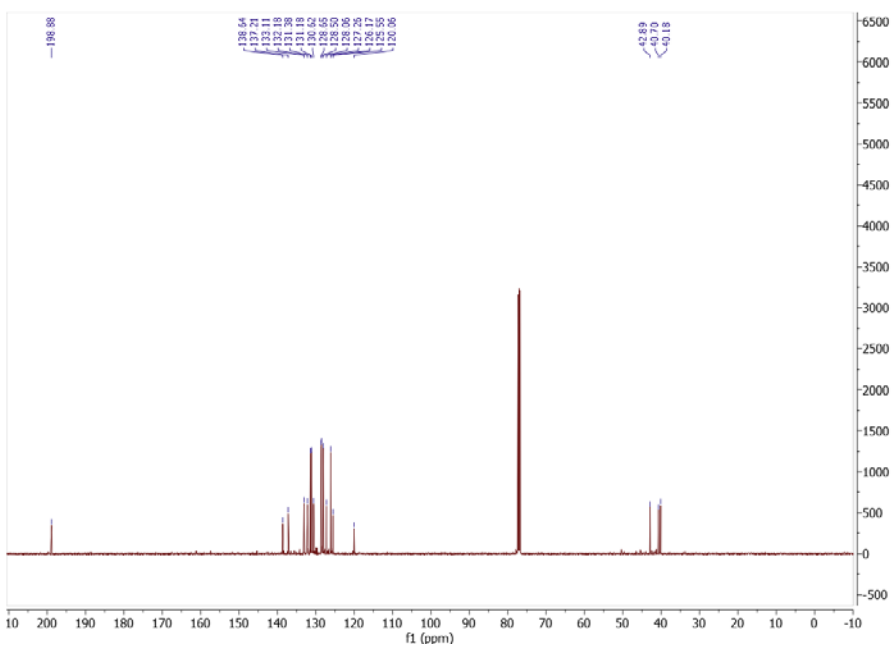

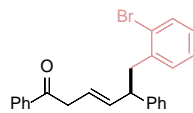

23

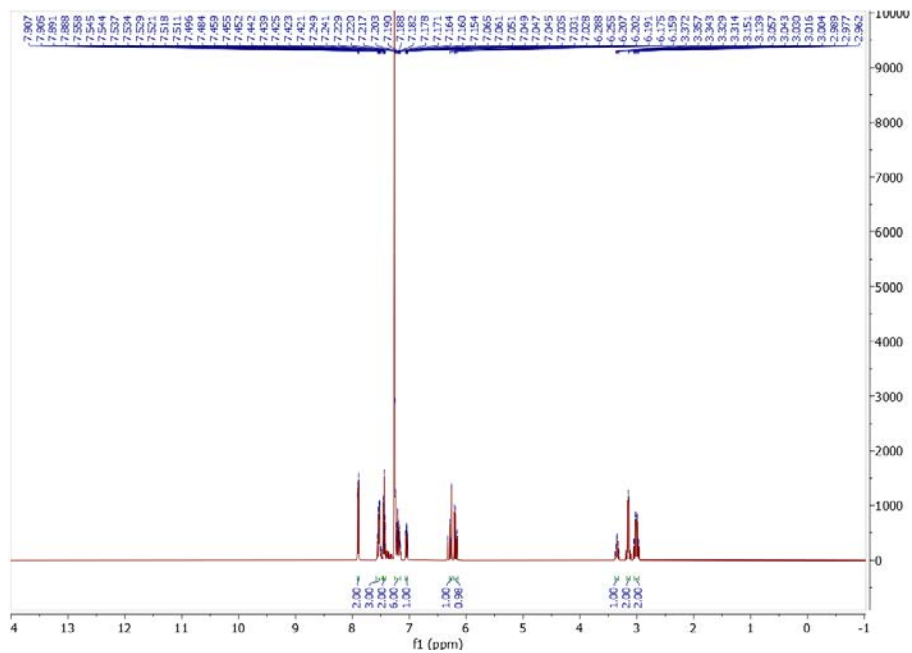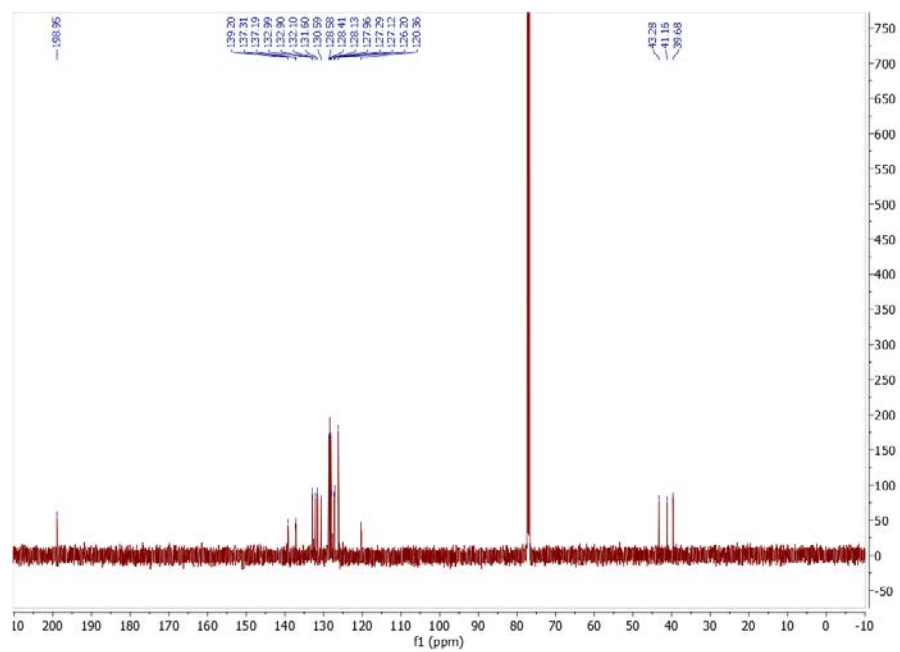

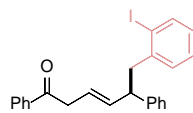

24

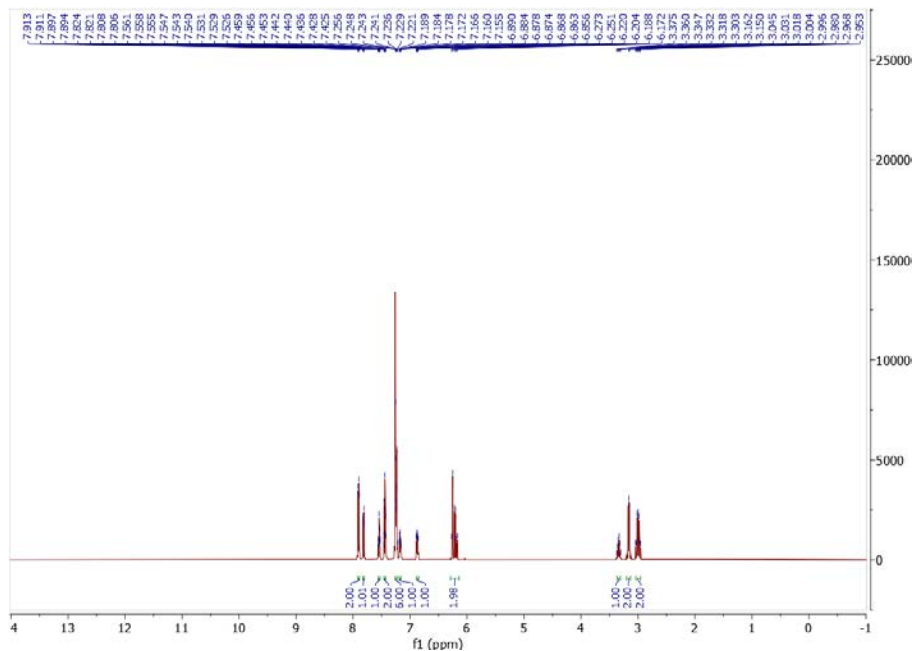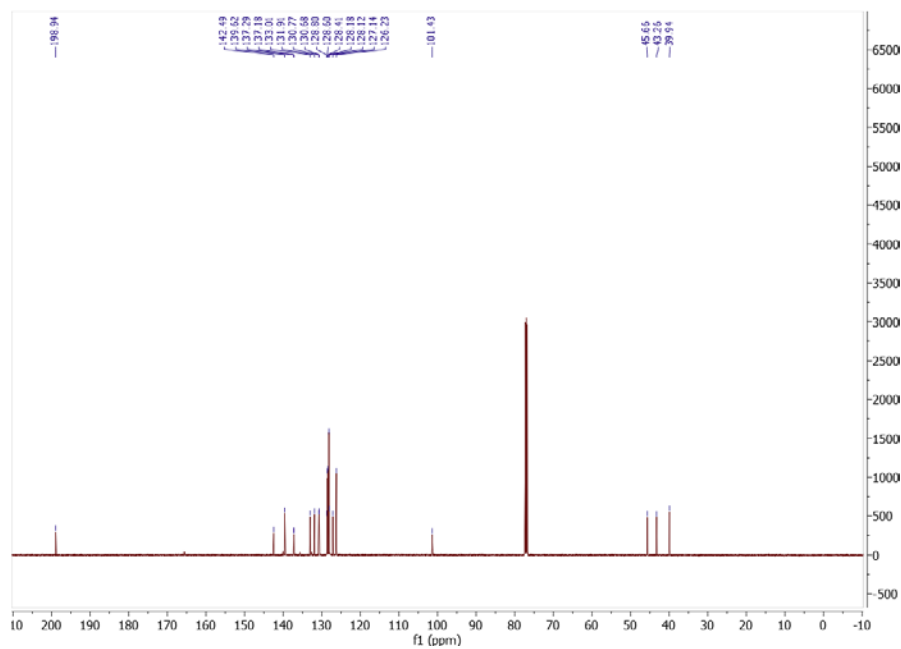

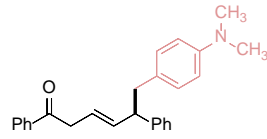

25

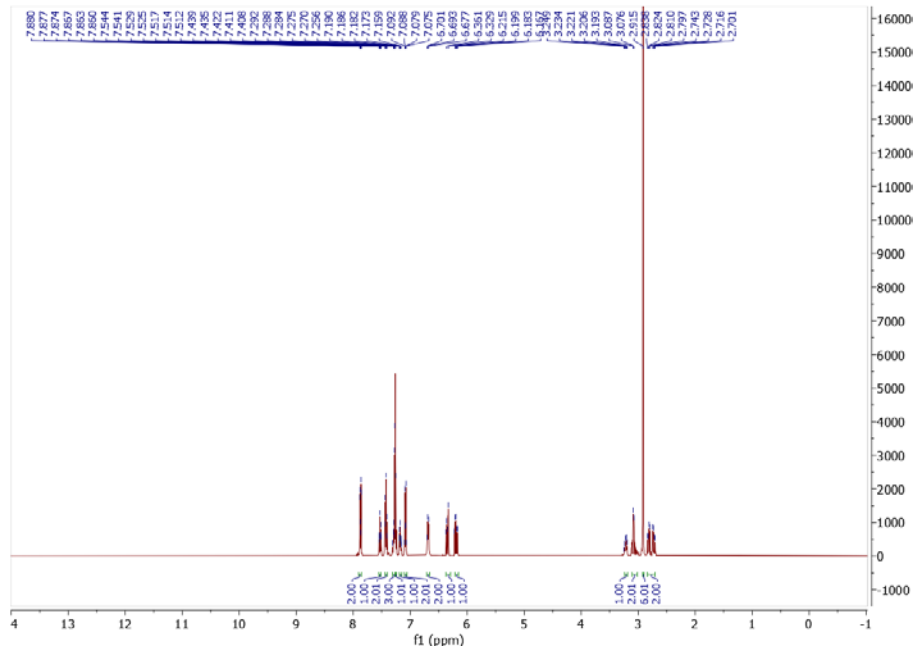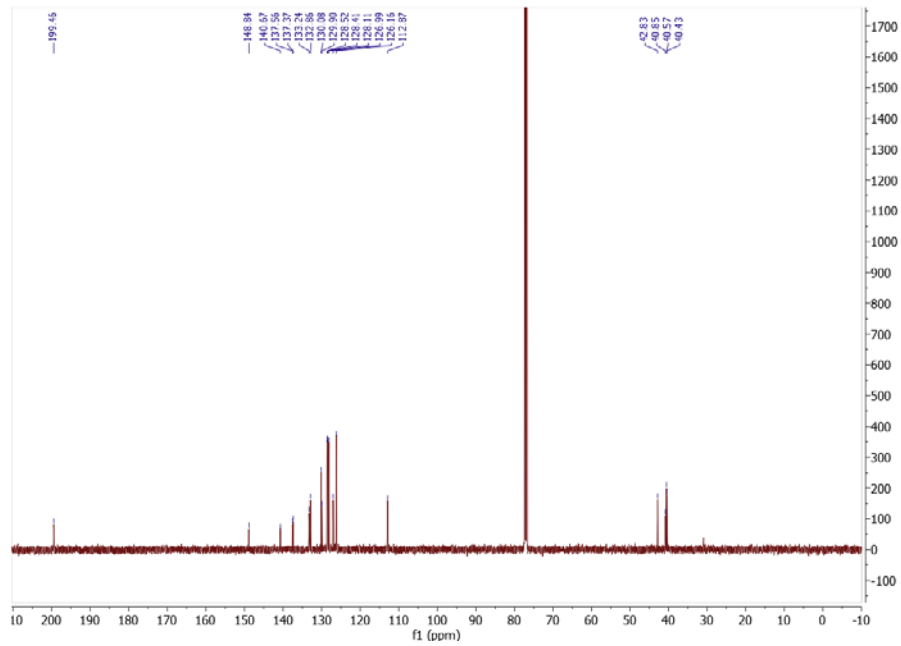



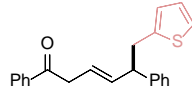

27

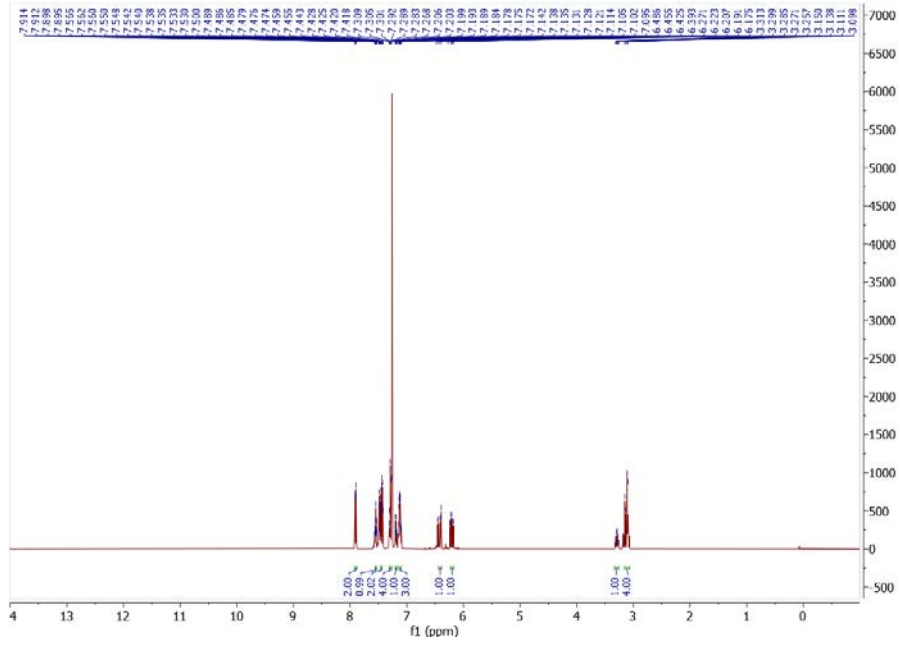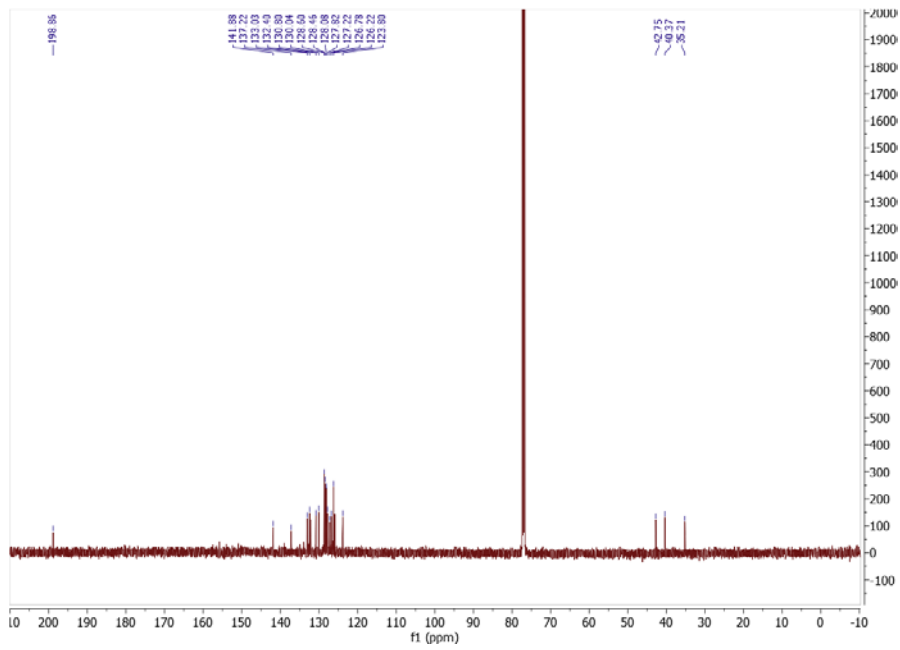





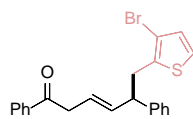

29

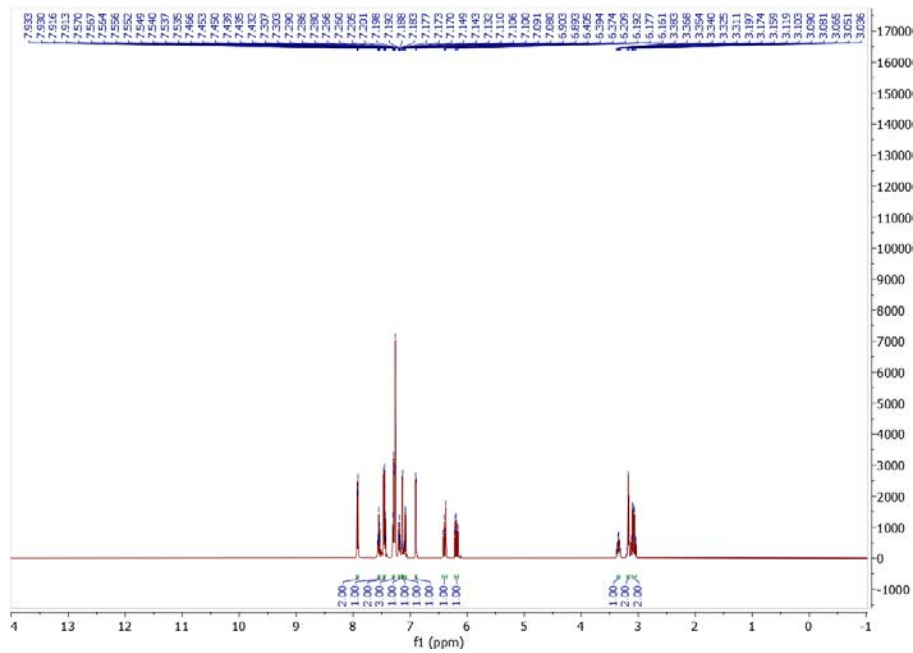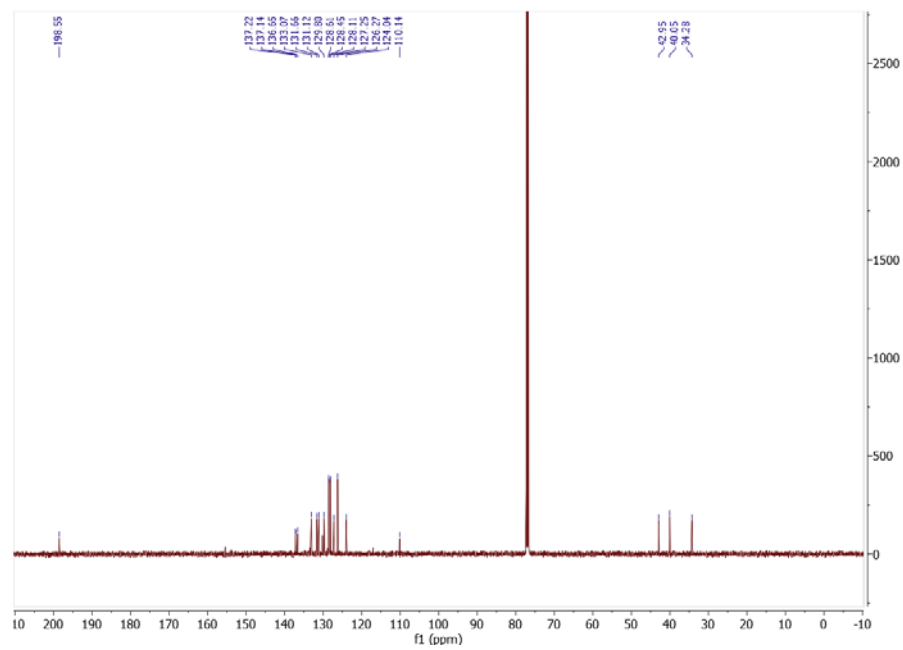

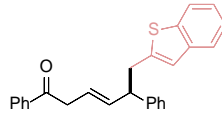

30

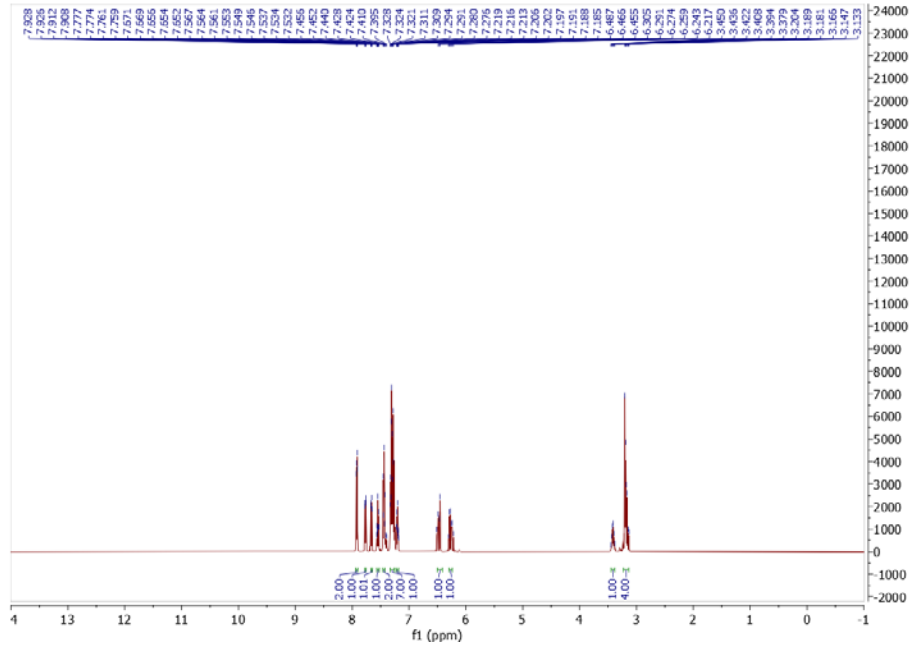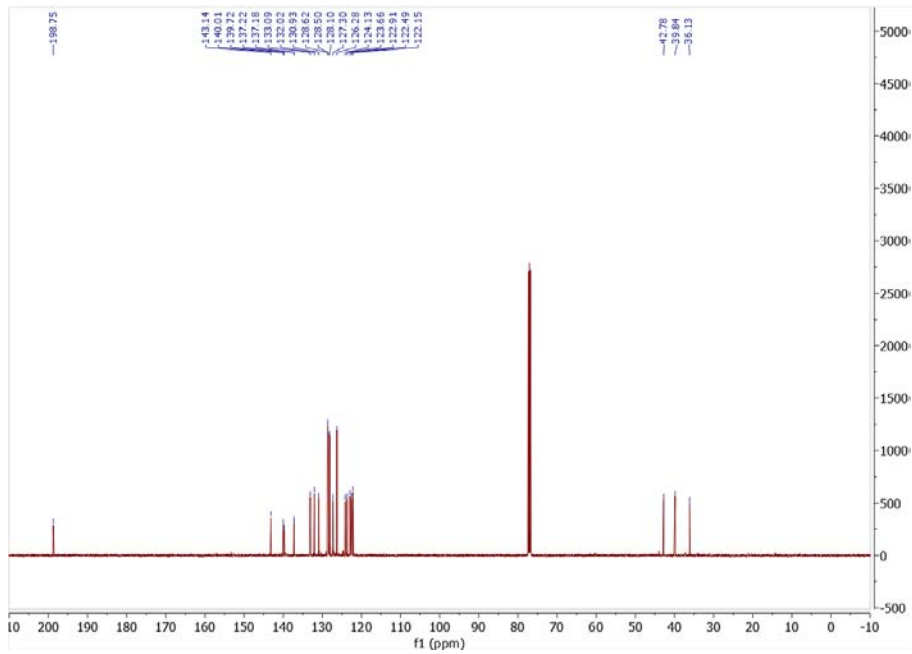

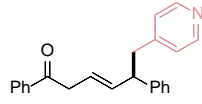

31

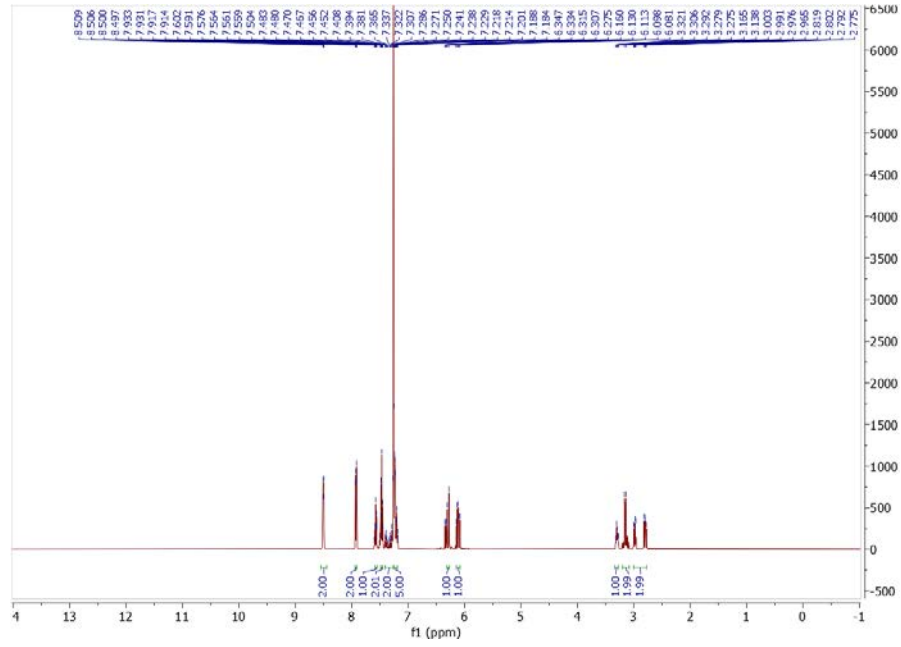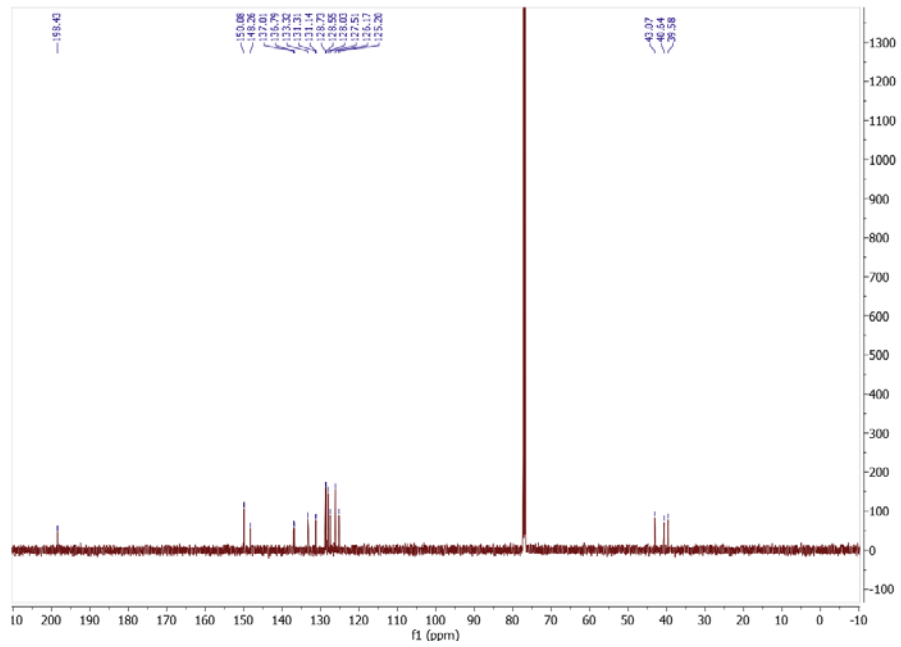

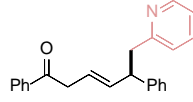

32

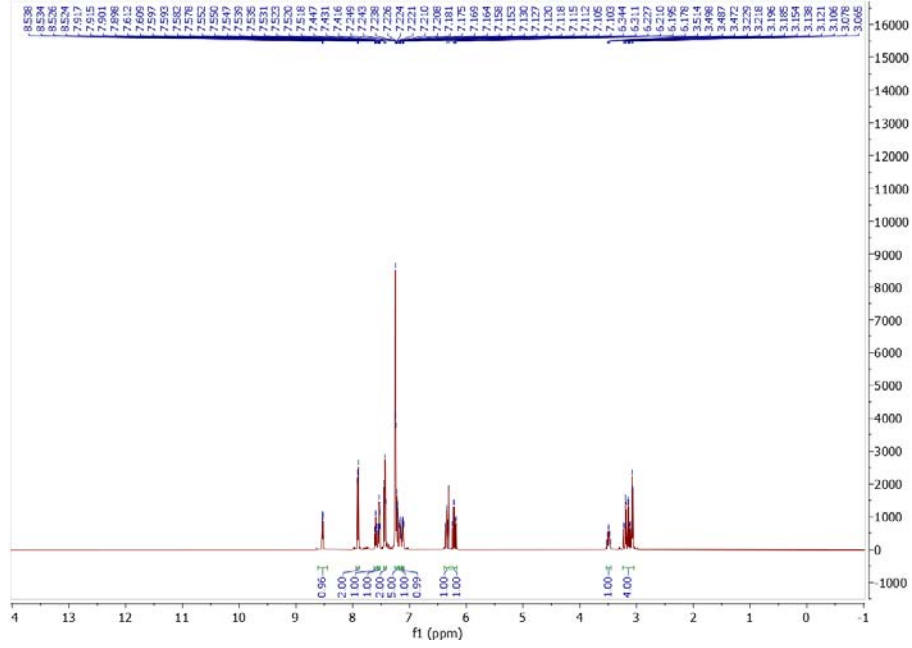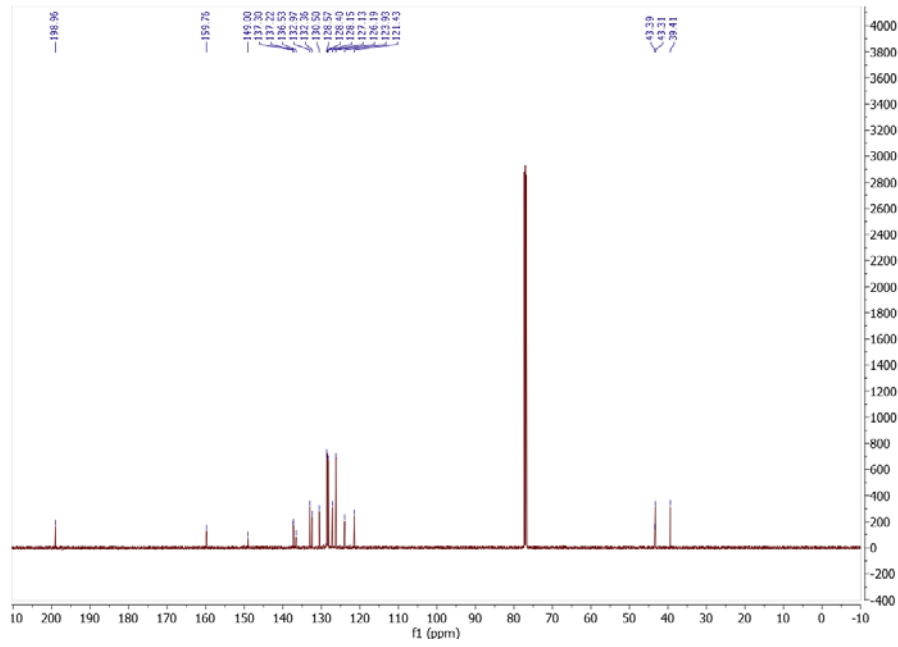

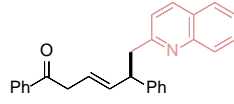

33

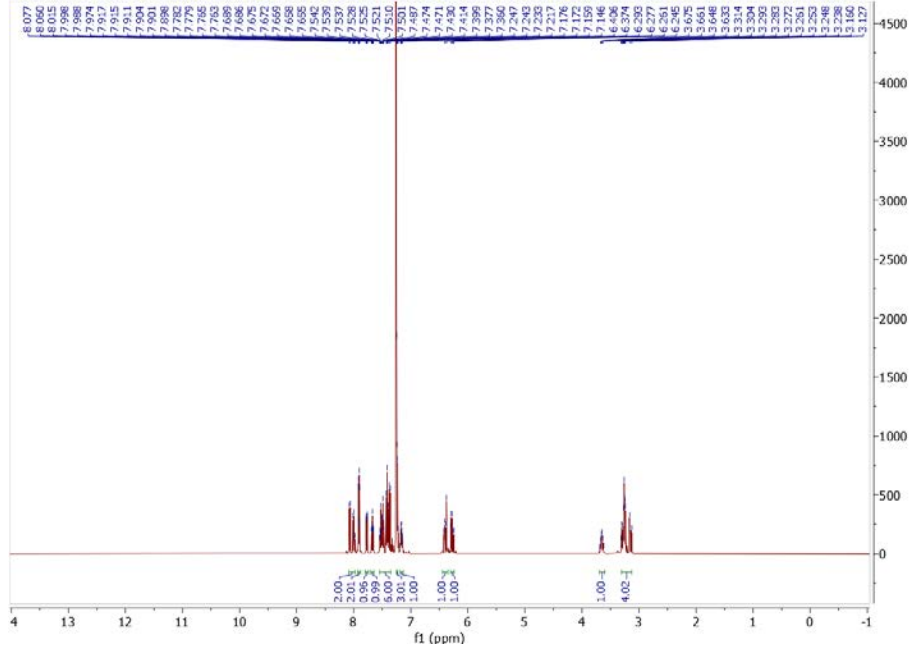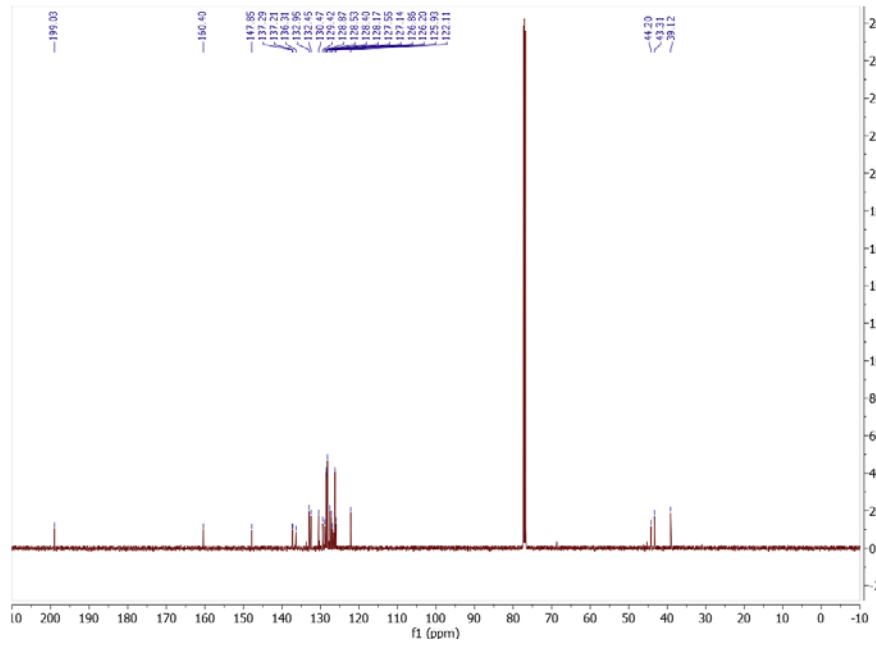

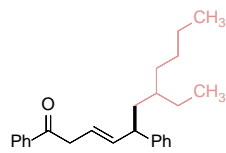

34

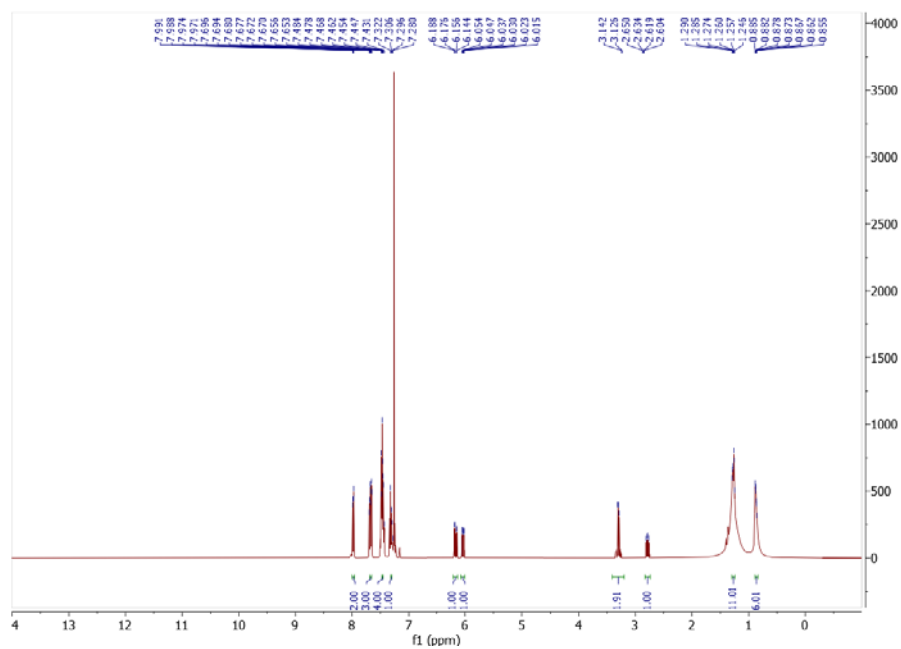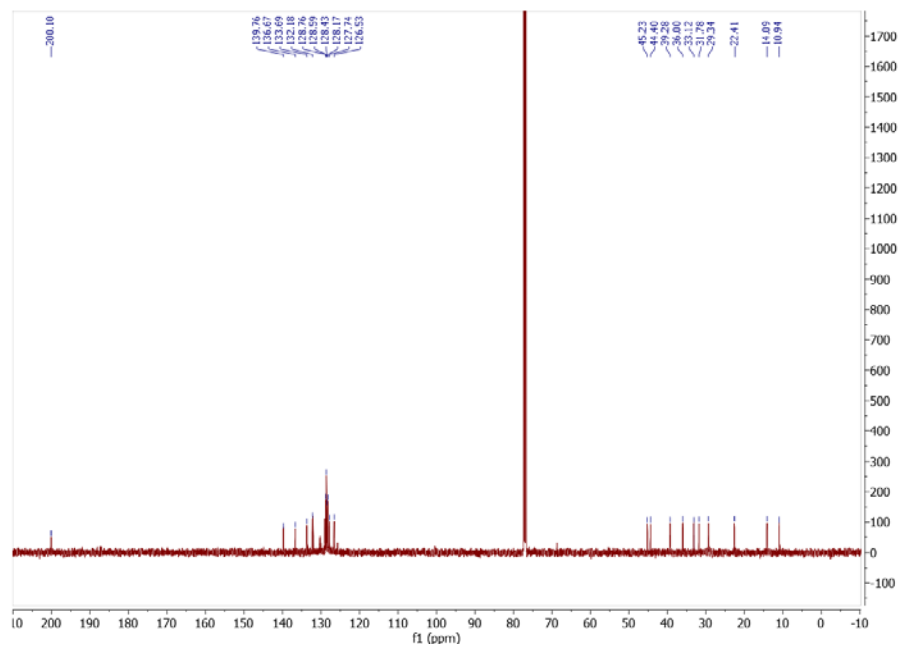

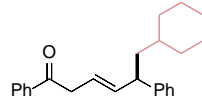

35

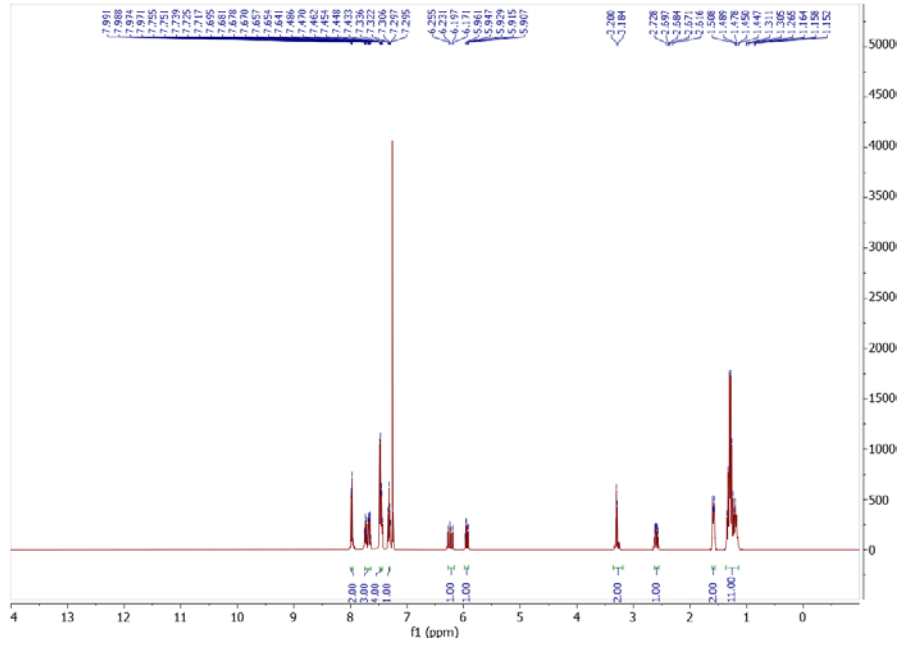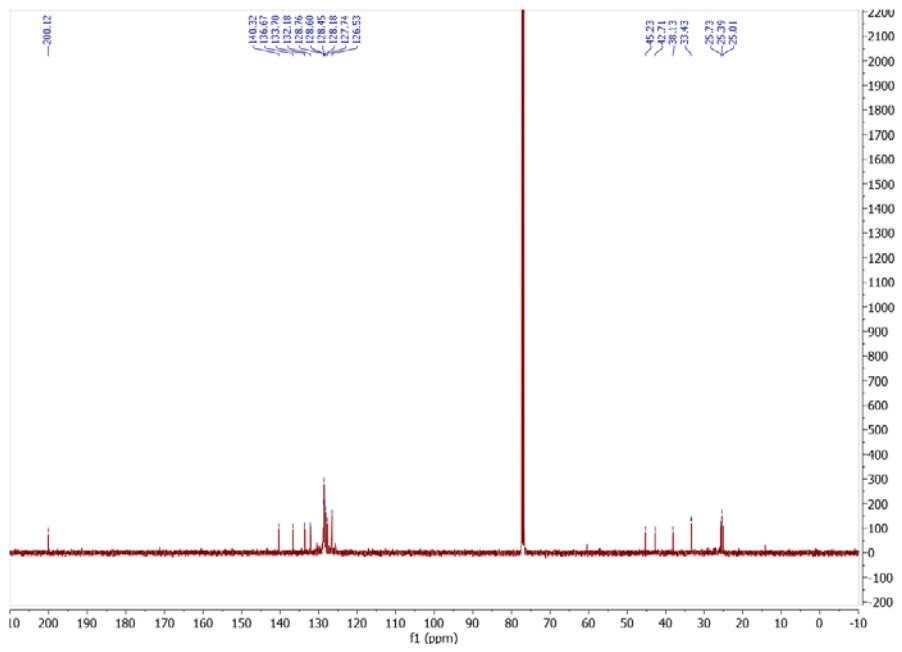

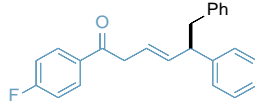

36

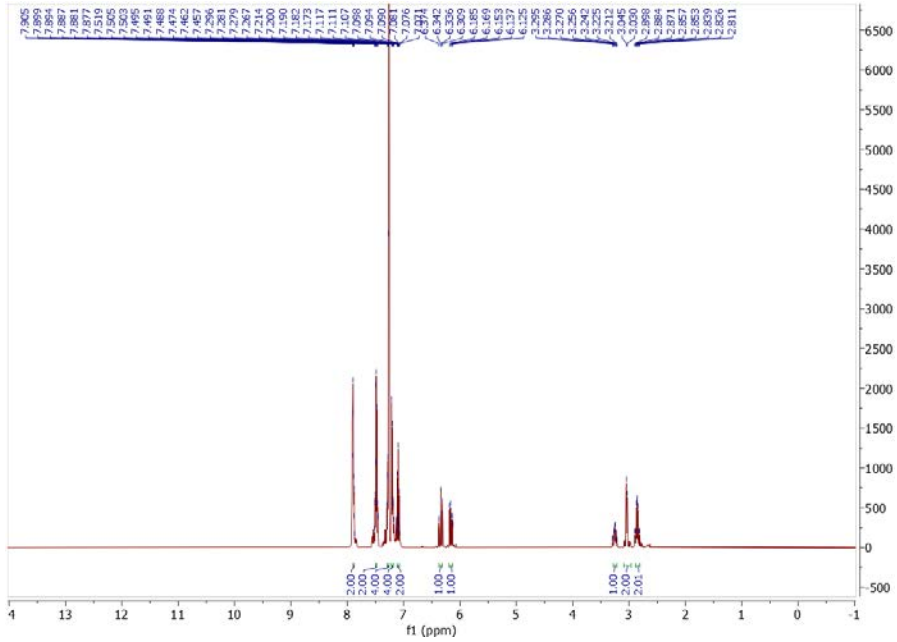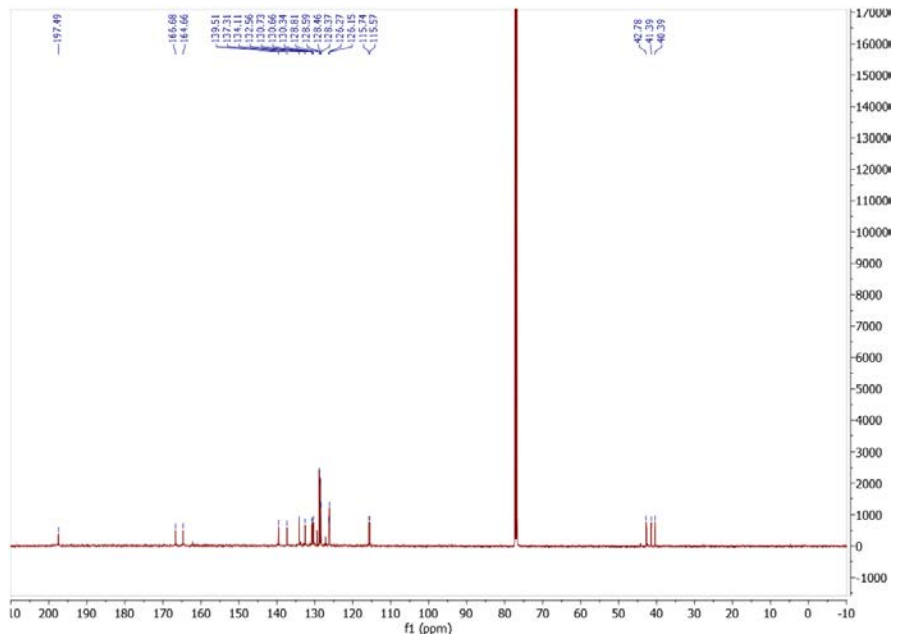



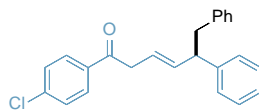

37

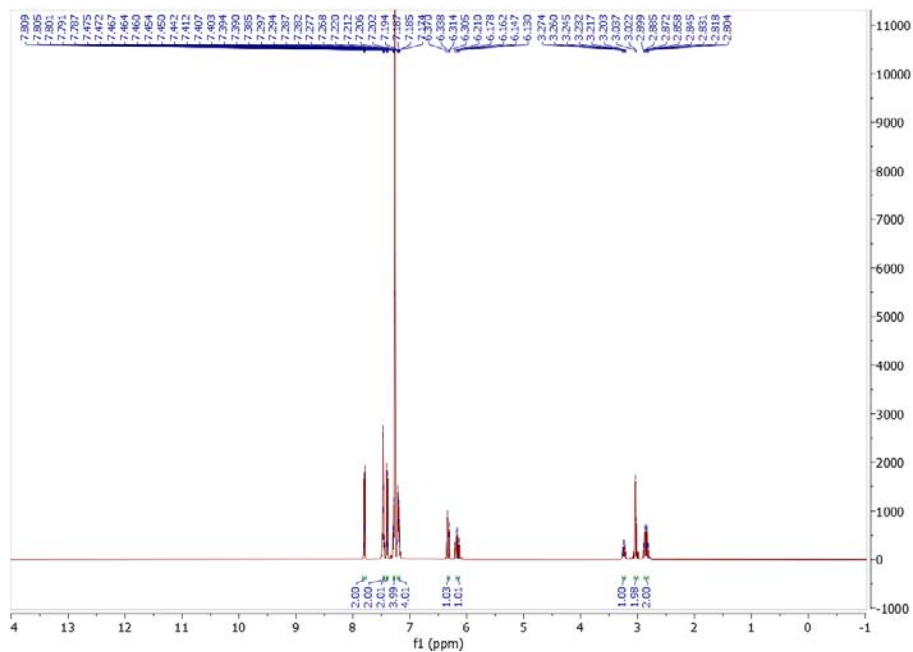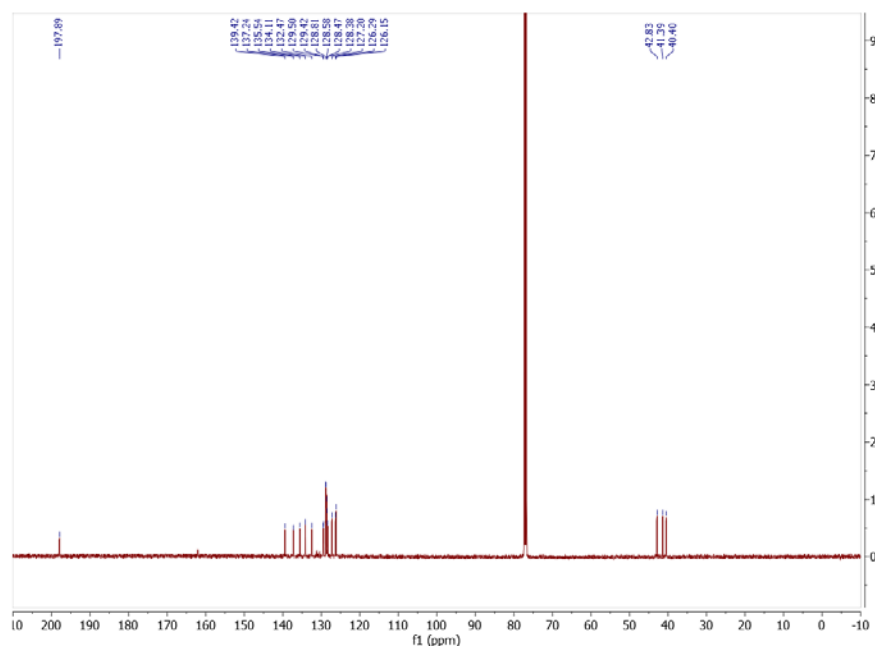

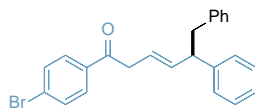

38

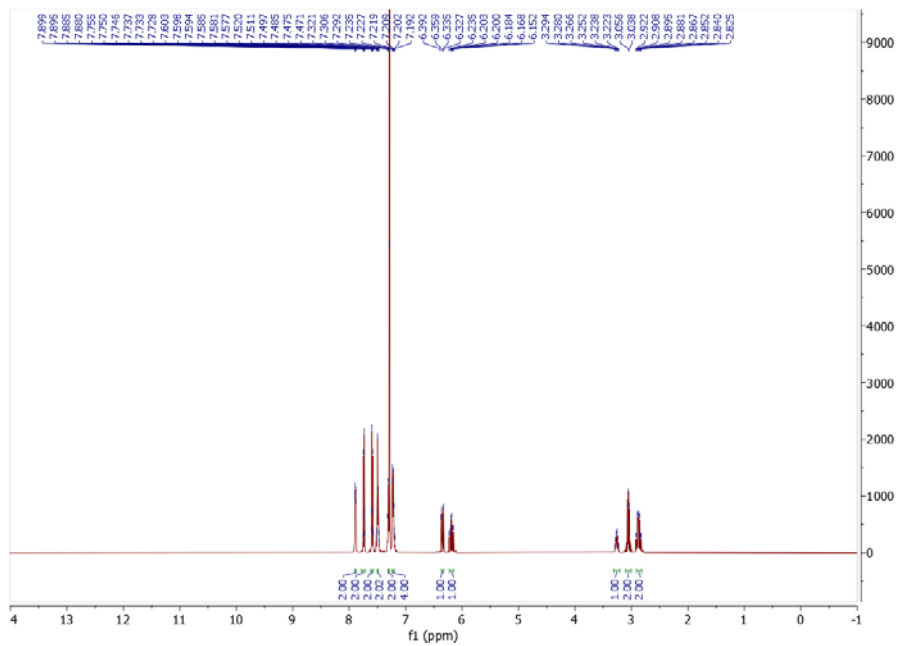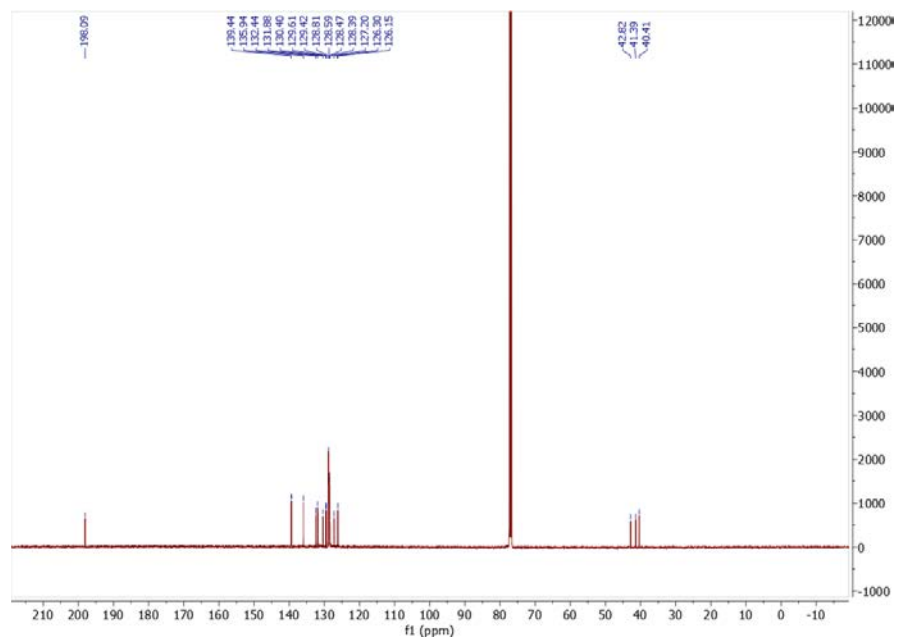

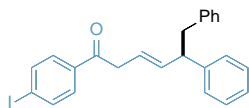

39

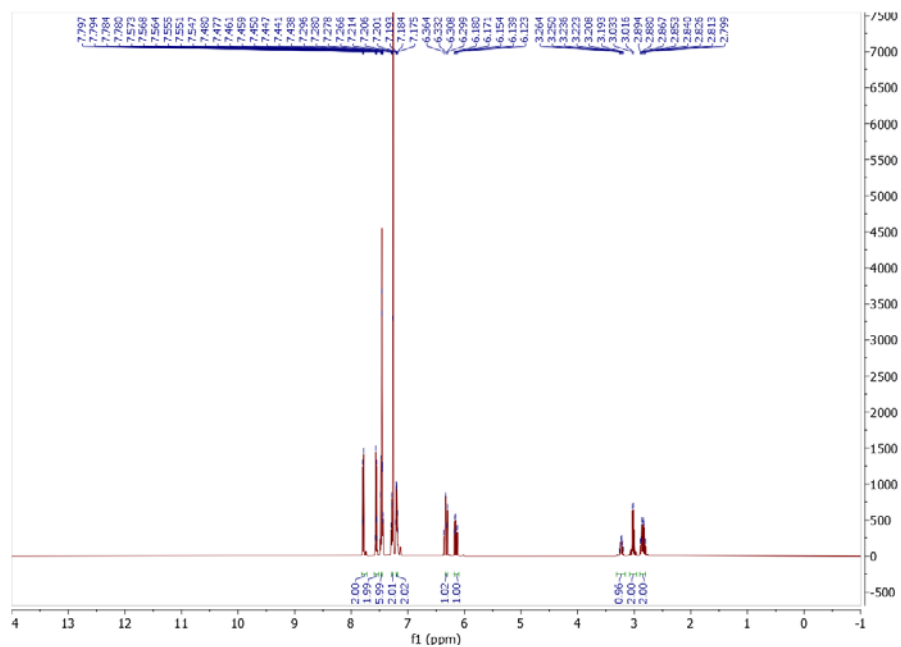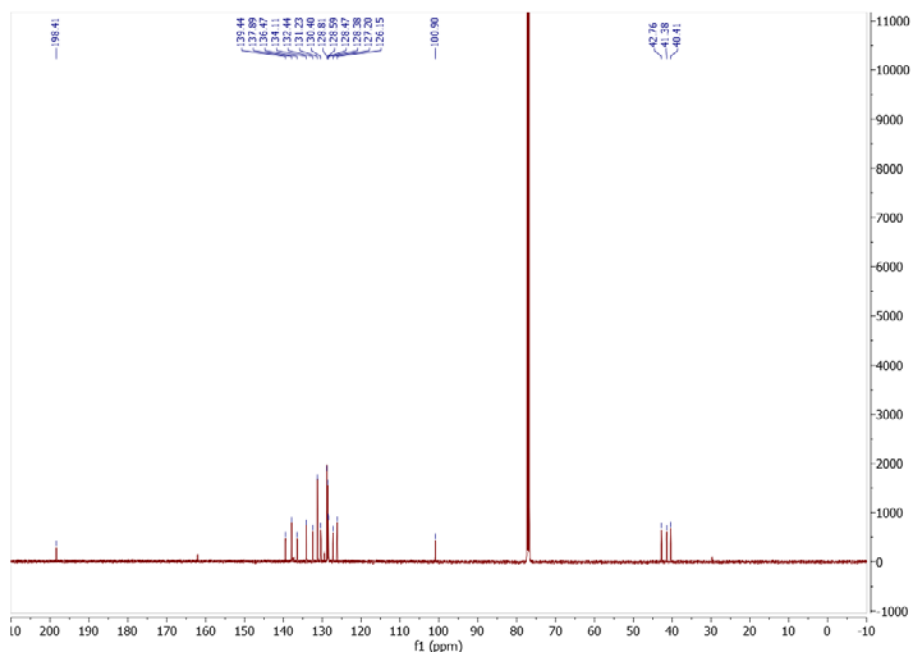

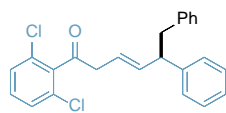

40

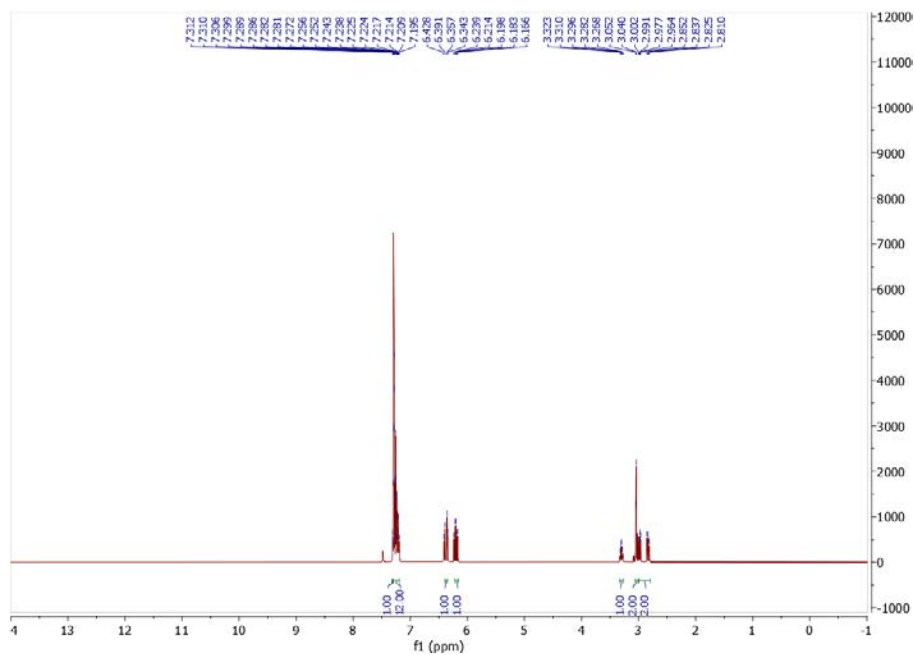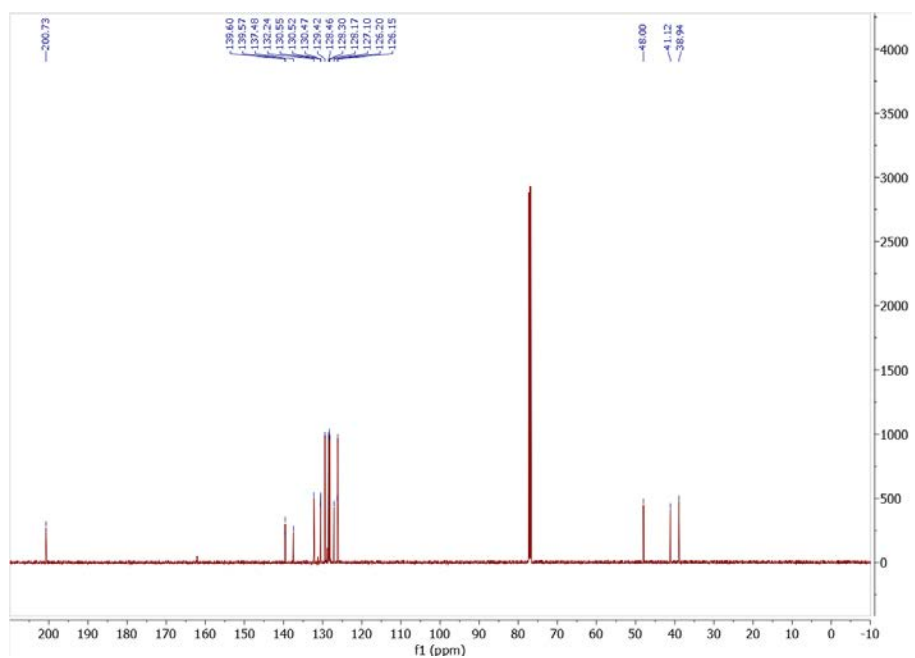

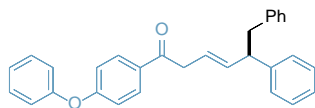

41

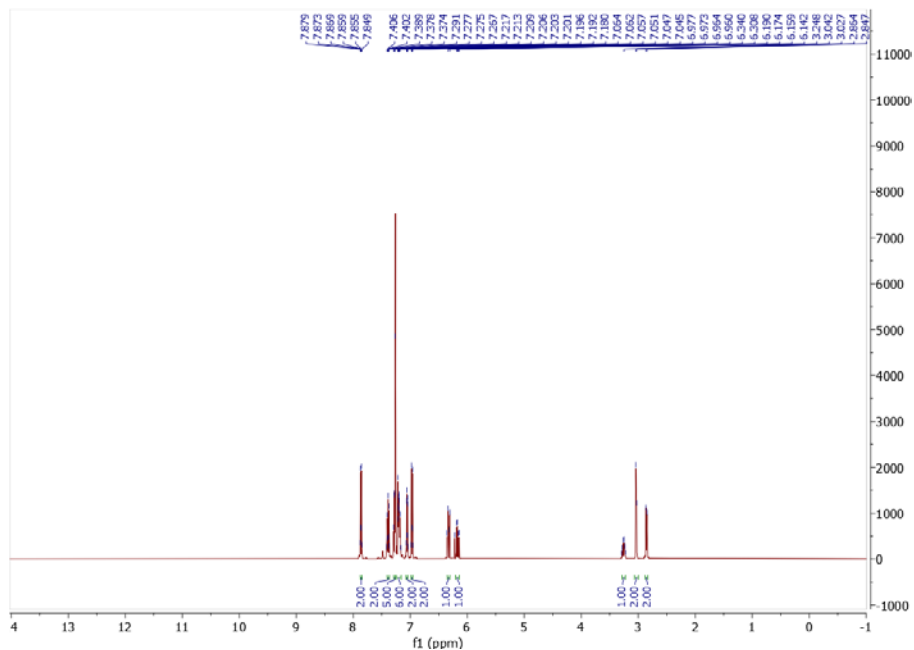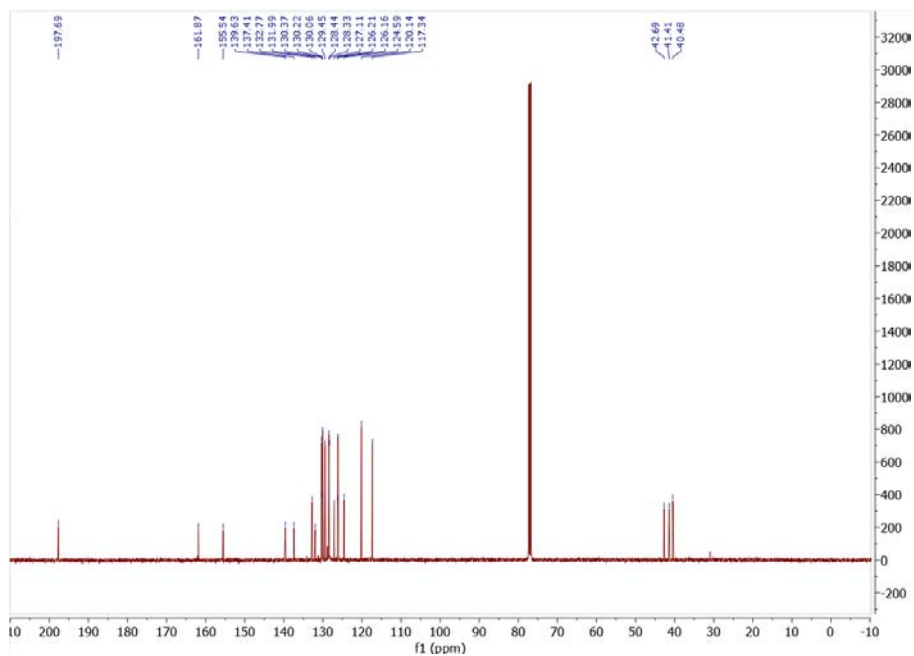

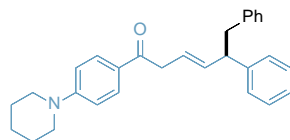

42

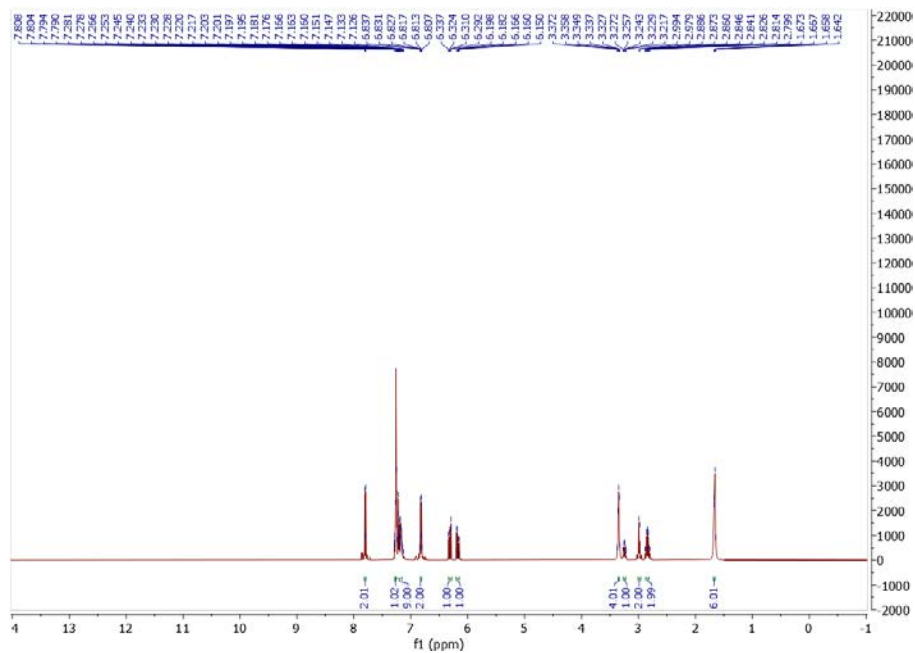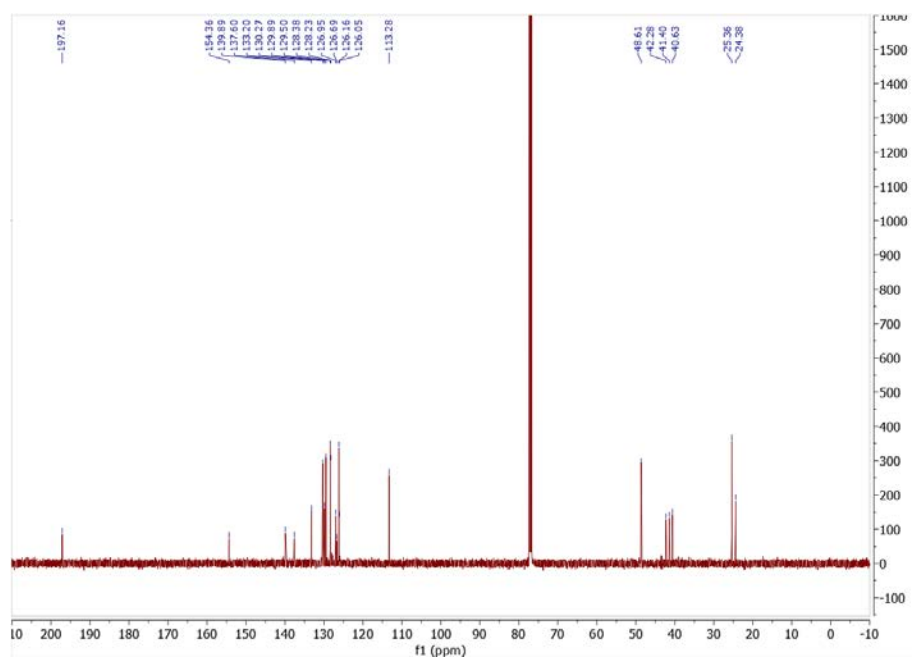

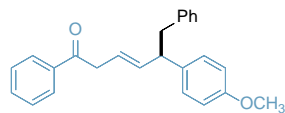

43

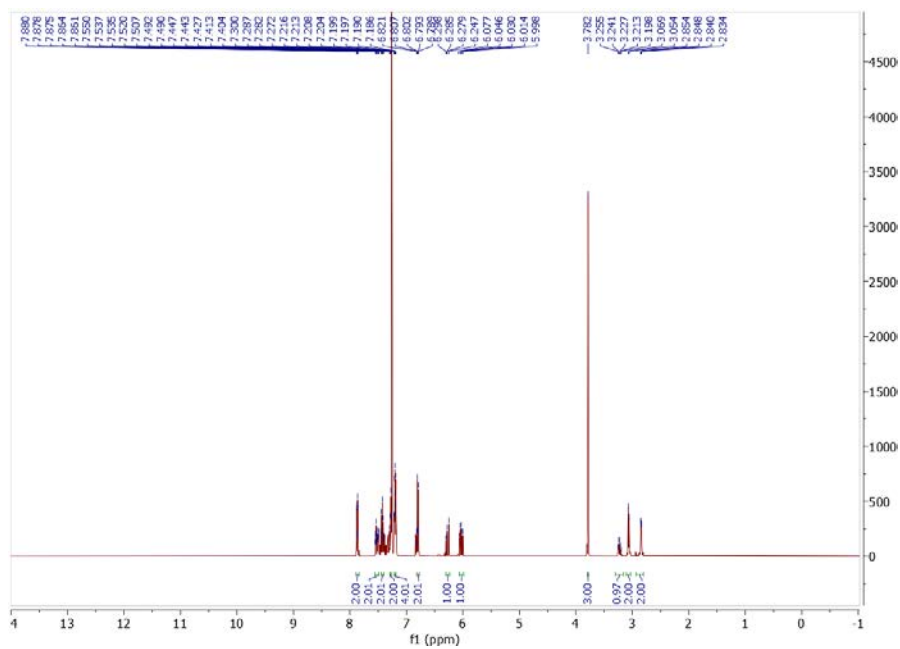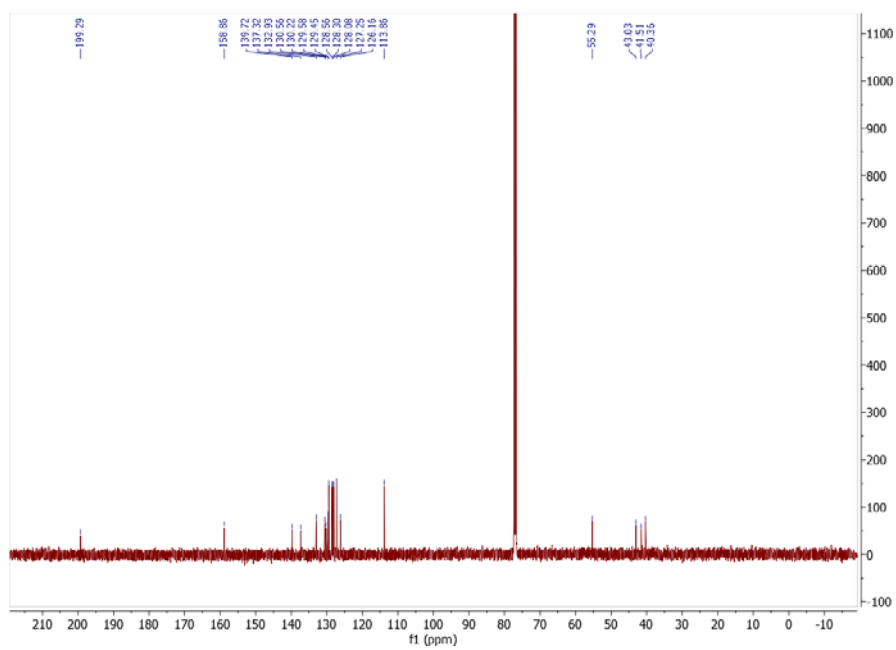

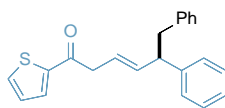

44

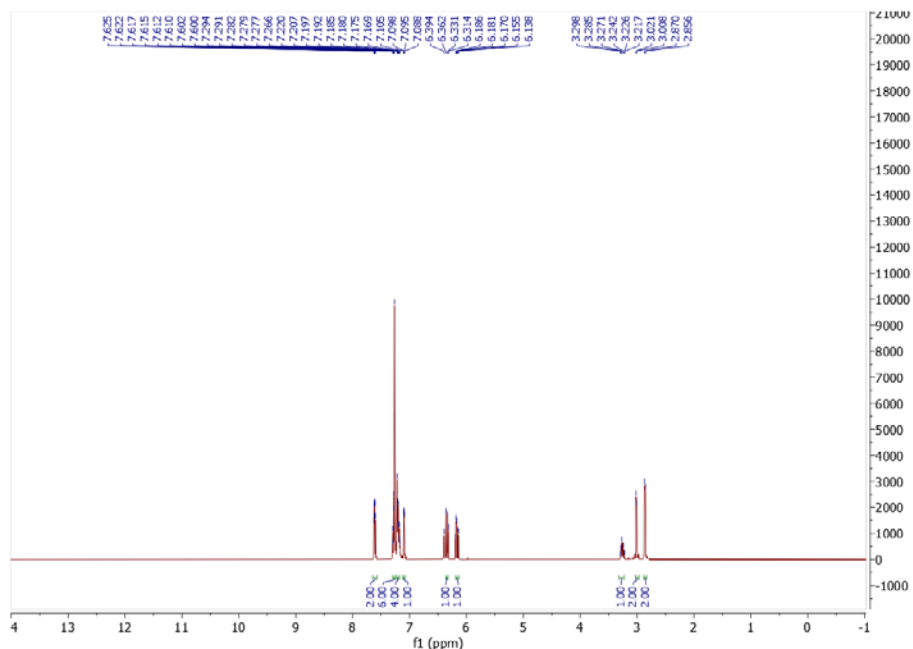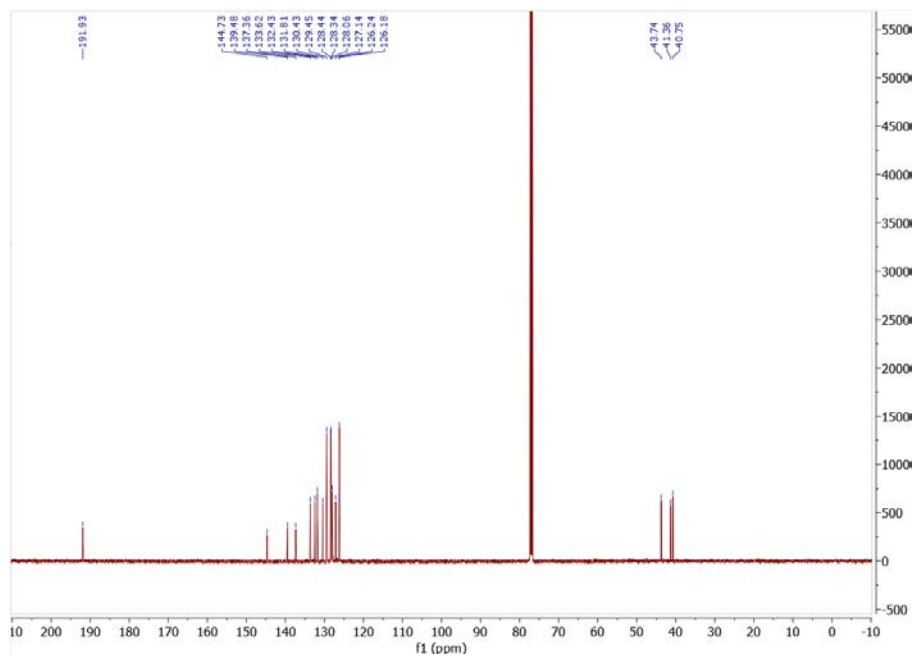



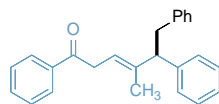

45

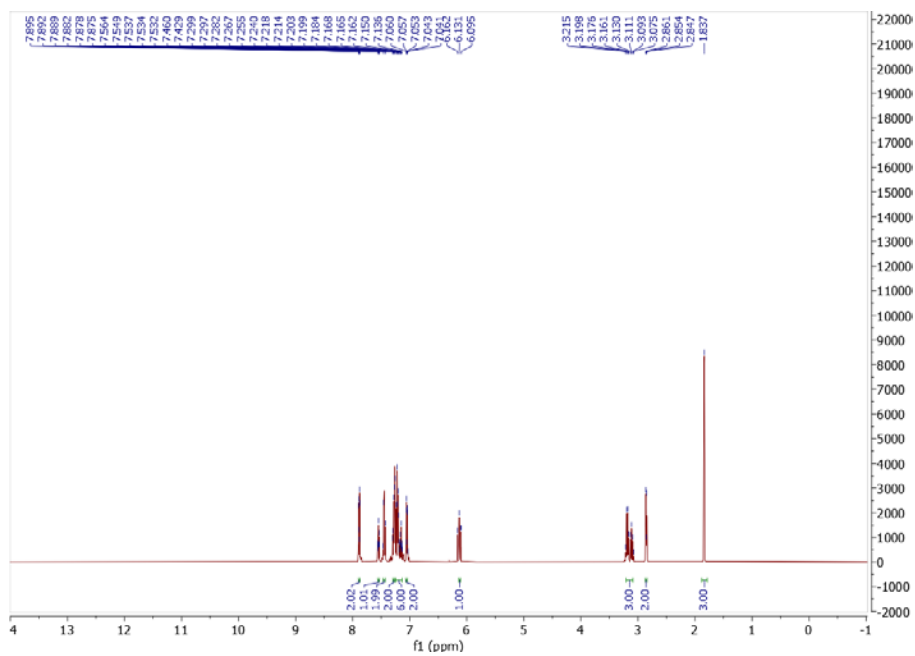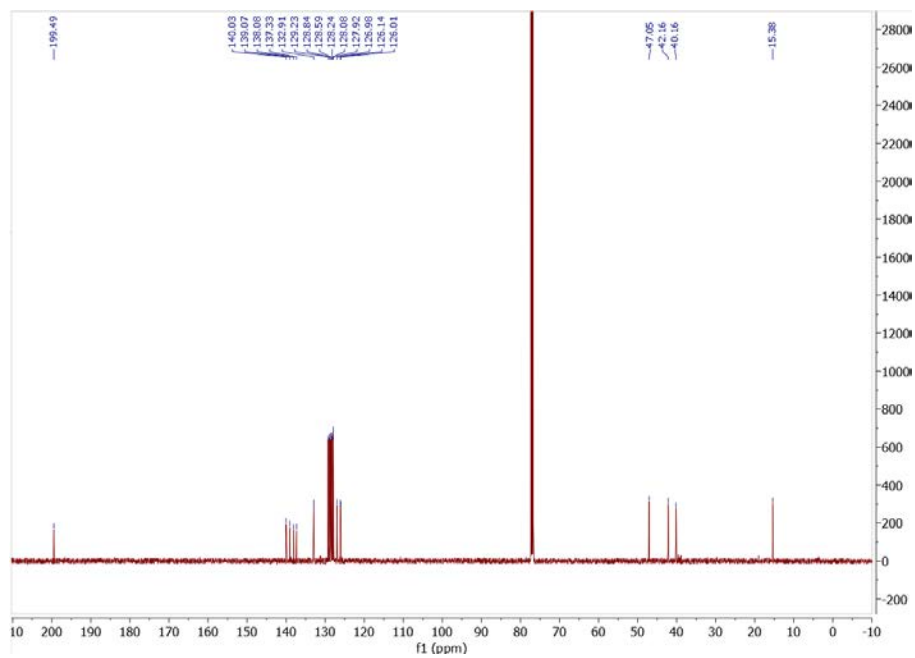

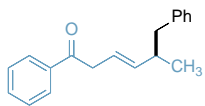

46

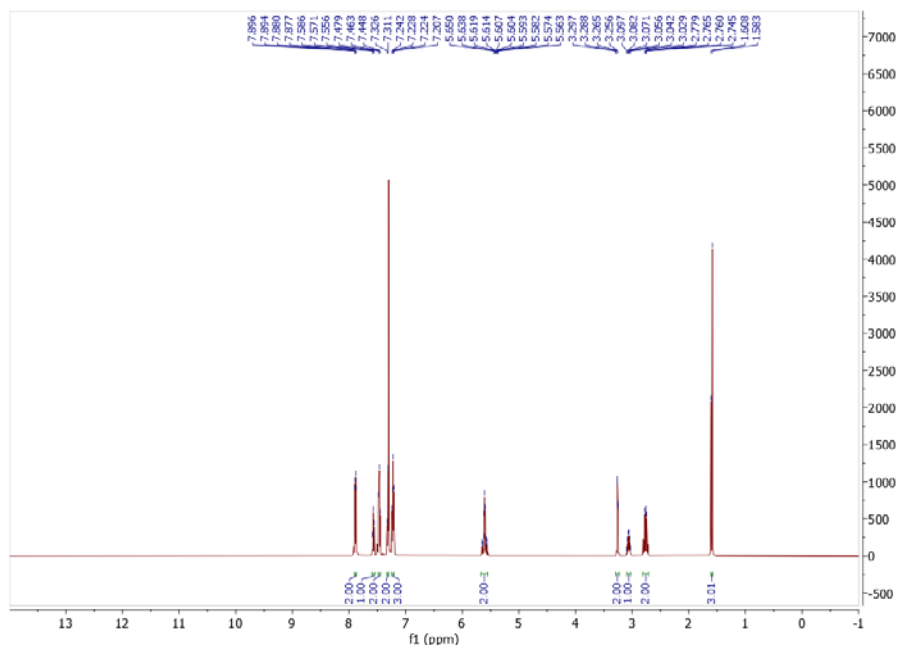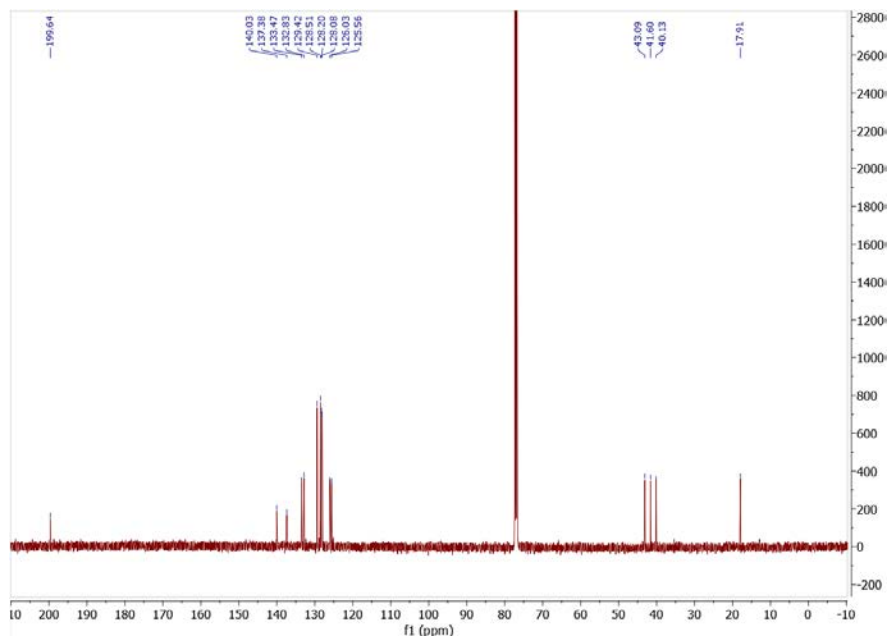

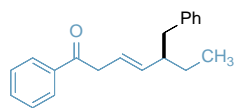

47

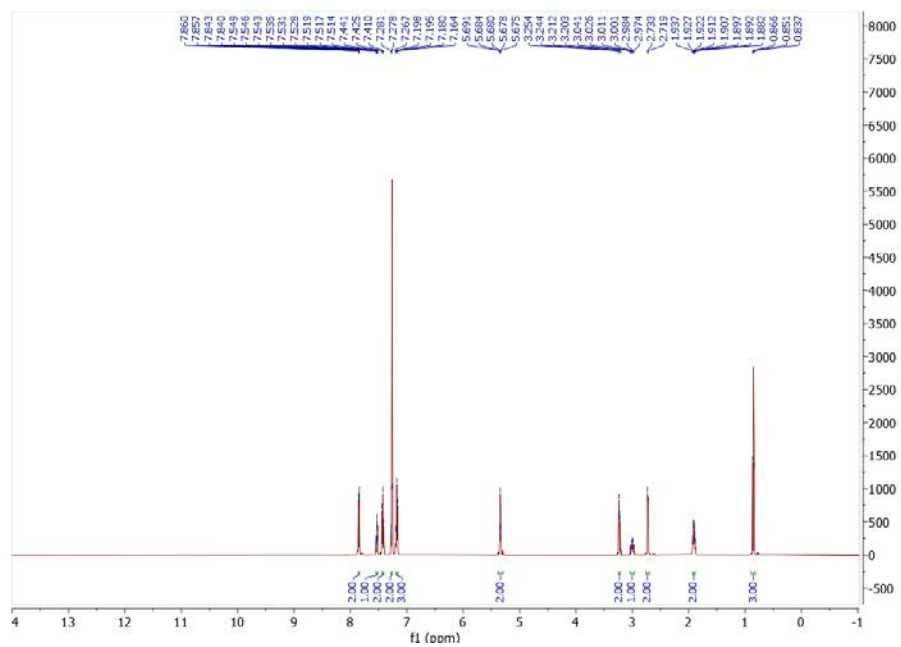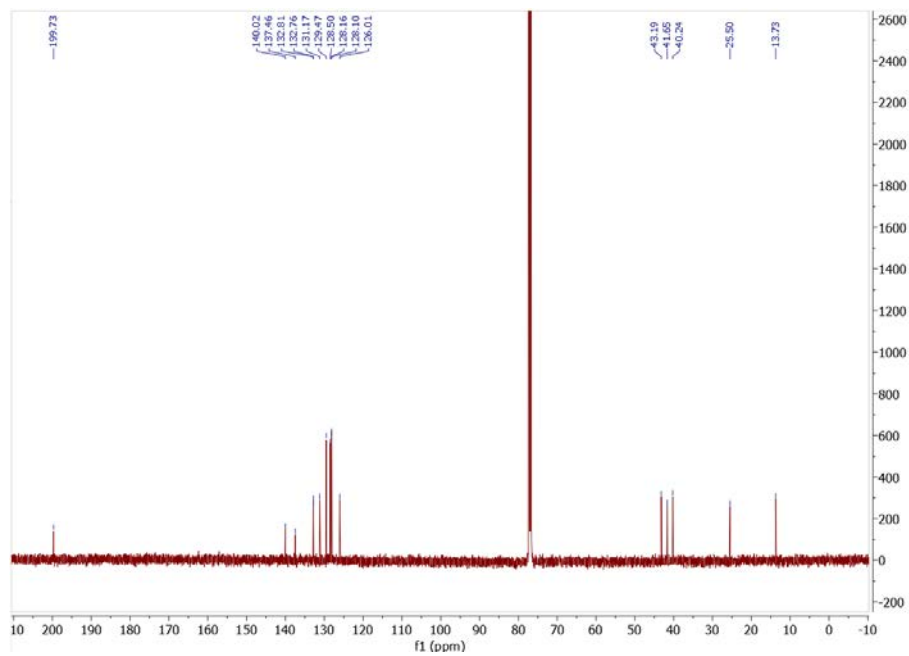

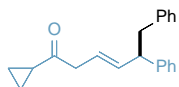

48

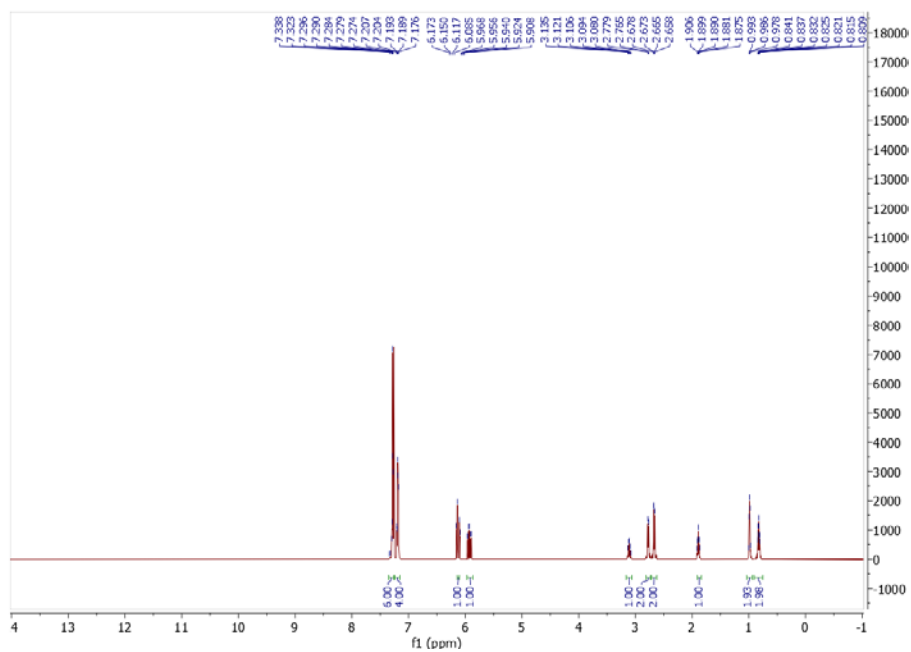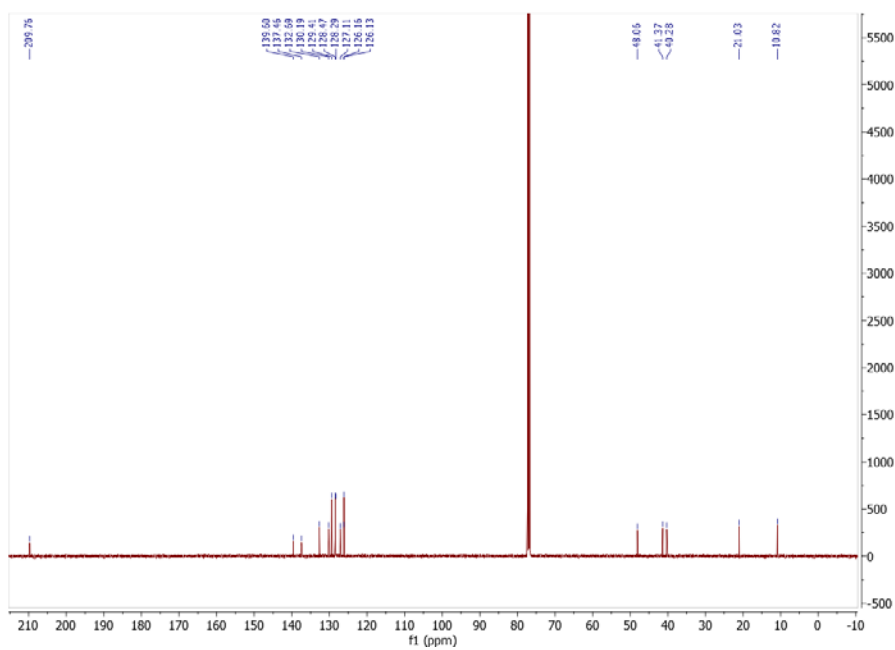

## 10. HPLC Chromatograph

HPLC instrument: Agilent Technologies 1260 Infinity instrument equipped with a quaternary pump

Column: Chiralpak OD-H, Daicel Corporation (250 mL × 4.6 mm, 5 μm)

Eluent: Pentane/IPA (98:2)

Flow rate: 0.7 mL/min

λ = 260 nm

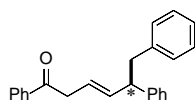

4a

Racemic sample (4a):

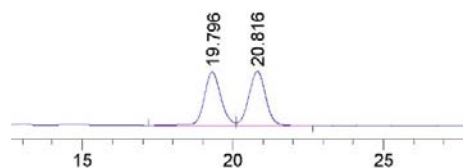

| Peak # | RetTime [min] | Type | Width [min] | Area [mAU*s] | Height [mAU] | Area %  |
|--------|---------------|------|-------------|--------------|--------------|---------|
| 1      | 19.796        | BV   | 0.5895      | 4443.76709   | 115.85569    | 49.3672 |
| 2      | 20.816        | VB   | 0.6037      | 4557.68066   | 117.70588    | 50.6328 |

Enriched sample (4a):

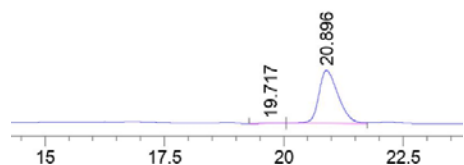

| Peak # | RetTime [min] | Type | Width [min] | Area [mAU*s] | Height [mAU] | Area %  |
|--------|---------------|------|-------------|--------------|--------------|---------|
| 1      | 19.717        | BB   | 0.4670      | 144.20700    | 5.11447      | 0.7735  |
| 2      | 20.896        | BV   | 0.4310      | 1.84995e4    | 656.05652    | 99.2265 |

## 11. References

1. K. Lee and D. Y. Oh, *Synthesis*, 1991, 213-214.
2. C. M. M. Santos, A. M. S. Silva, J. A. S. Cavaleiro, A. Lévai and T. Patonay, *E. J. Org. Chem.*, 2007, 2877-2887.
3. D. Trubitsõn, J. Martõnova, K. Erkman, A. Metsala, J. Saame, K. Kõster, I. Järving, I. Leito and T. Kanger, *Synthesis*, 2020, **52**, 1047-1059.
4. L. Lv, D. Zhu, Z. Qiu, J. Li and C.-J. Li, *ACS Catal.*, 2019, **9**, 9199-9205.
